# Supplementary material
Source: PubMed Central journal article supplement (PMC3208663)

Figure E1

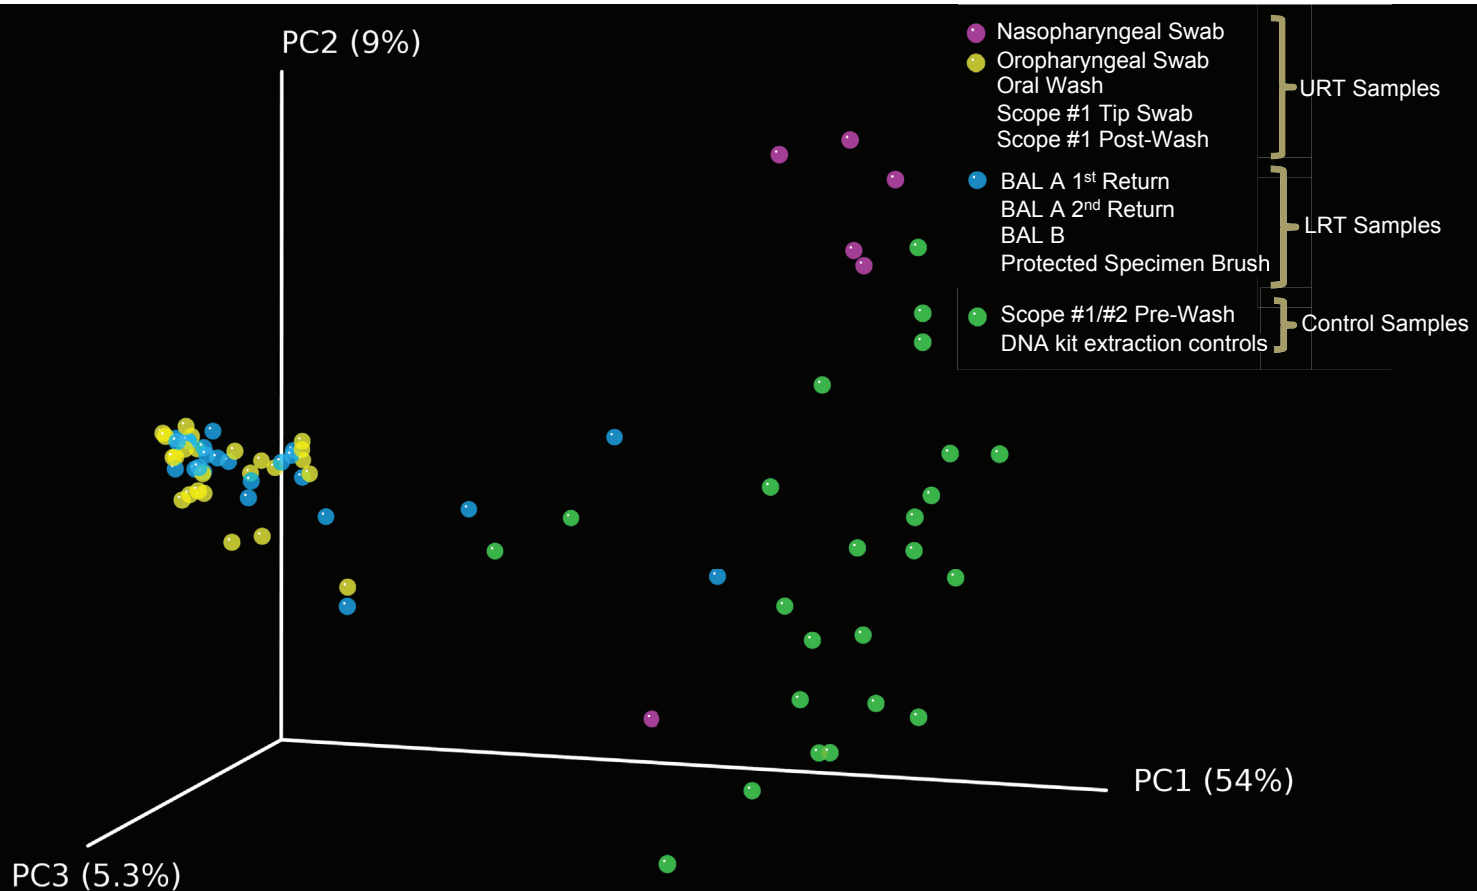

Figure E2

(A)

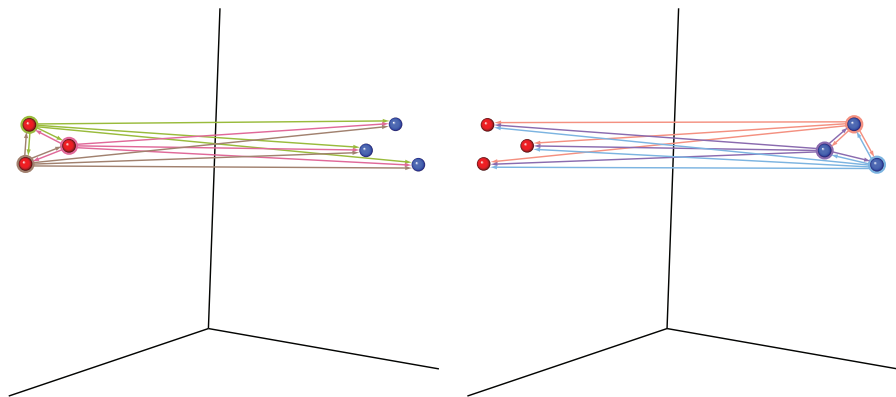

(B)

|                    | Extraction Control | Scope 1 Pre-Wash | Scope 2 Pre-Wash | NP Swab  | OP Swab  | OW       | Scope 1 Tip-Swab | Scope 1 Post-Wash | BAL A 1st Return | BAL A 2nd Return | BAL B    | PSB      |
|--------------------|--------------------|------------------|------------------|----------|----------|----------|------------------|-------------------|------------------|------------------|----------|----------|
| Extraction Control | NA                 | 8.67E-01         | 7.55E-01         | 1.95E-01 | 1.34E-08 | 6.78E-07 | 1.99E-04         | 3.73E-08          | 3.77E-04         | 2.65E-03         | 7.67E-04 | 4.82E-08 |
| Scope 1 Pre-Wash   | 4.75E-01           | NA               | 6.22E-01         | 5.14E-01 | 1.19E-03 | 4.40E-03 | 4.81E-03         | 1.87E-03          | 5.28E-03         | 1.28E-02         | 5.72E-07 | 1.89E-03 |
| Scope 2 Pre-Wash   | 5.75E-01           | 7.02E-01         | NA               | 6.51E-01 | 1.19E-03 | 3.73E-03 | 2.97E-03         | 2.07E-03          | 5.28E-03         | 1.28E-02         | 6.16E-03 | 2.44E-03 |
| NP Swab            | 2.14E-01           | 1.82E-01         | 6.07E-01         | NA       | 1.39E-03 | 2.49E-03 | 3.78E-03         | 1.84E-03          | 6.16E-03         | 1.14E-02         | 4.94E-03 | 2.03E-03 |
| OP Swab            | 1.00E-15           | 5.84E-11         | 1.42E-09         | 1.99E-11 | NA       | 7.31E-01 | 3.77E-01         | 6.88E-01          | 4.89E-01         | 1.51E-01         | 2.49E-01 | 4.29E-01 |
| OW                 | 3.90E-14           | 1.15E-10         | 1.86E-09         | 4.42E-11 | 7.90E-01 | NA       | 6.41E-01         | 6.45E-01          | 5.31E-01         | 1.33E-01         | 2.56E-01 | 7.13E-01 |
| Scope 1 Tip-Swab   | 7.72E-12           | 3.22E-11         | 2.31E-10         | 7.29E-12 | 6.76E-01 | 9.58E-01 | NA               | 6.85E-01          | 8.43E-01         | 2.96E-01         | 3.53E-01 | 4.69E-01 |
| Scope 1 Post-Wash  | 0.00               | 9.92E-13         | 4.43E-11         | 1.07E-13 | 8.45E-01 | 7.97E-01 | 2.91E-01         | NA                | 4.31E-01         | 9.36E-02         | 1.68E-01 | 5.18E-01 |
| BAL A 1st Return   | 5.73E-06           | 9.37E-06         | 6.95E-06         | 5.63E-06 | 7.55E-01 | 7.28E-01 | 6.93E-01         | 5.05E-01          | NA               | 9.65E-01         | 8.61E-01 | 4.07E-01 |
| BAL A 2nd Return   | 7.84E-04           | 8.87E-04         | 4.82E-04         | 3.63E-04 | 5.32E-01 | 5.10E-01 | 4.27E-01         | 3.76E-01          | 4.09E-01         | NA               | 4.85E-01 | 3.22E-01 |
| BAL B              | 2.74E-07           | 5.54E-07         | 5.72E-07         | 1.13E-07 | 5.64E-01 | 5.71E-01 | 5.77E-01         | 2.83E-01          | 4.87E-01         | 8.57E-01         | NA       | 2.51E-01 |
| PSB                | 0.00               | 1.49E-12         | 1.24E-10         | 3.02E-13 | 8.80E-01 | 4.52E-01 | 2.80E-01         | 8.81E-01          | 4.32E-01         | 8.05E-02         | 1.09E-01 | NA       |

Figure E3

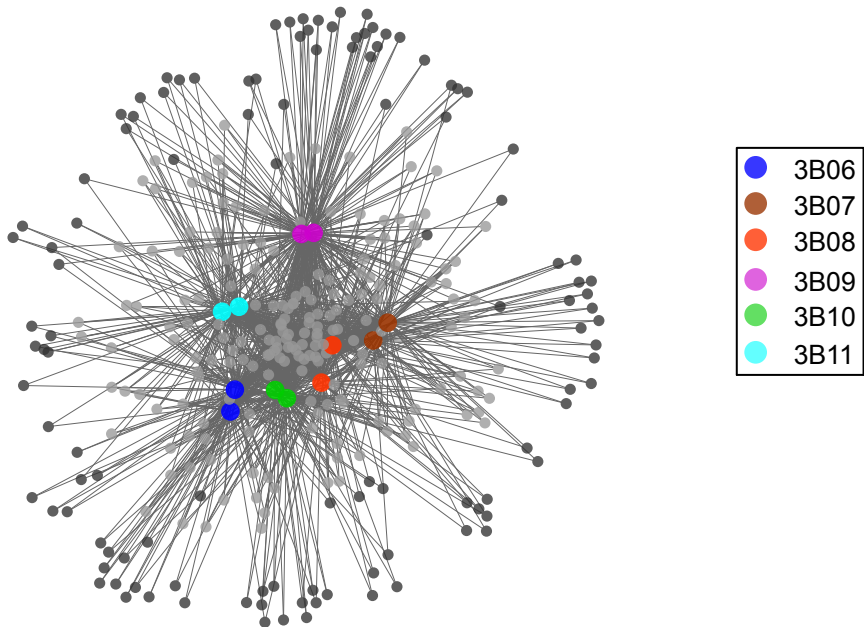

Supplement: supp_184_8_957__2.pdf [file supp_184_8_957__2.pdf]
