# Supplementary material
Source: PubMed Central journal article supplement (PMC3208663)
Supplement: supp_184_8_957__3.pdf [file supp_184_8_957__3.pdf]

Table E1

| <b>Patient ID#</b> | <b>Age</b> | <b>Gender</b> | <b>Race</b>      | <b>Smoker (pack years)</b> |
|--------------------|------------|---------------|------------------|----------------------------|
| 3B06               | 39         | Male          | Caucasian        | Yes (22)                   |
| 3B07               | 24         | Female        | Caucasian        | No                         |
| 3B08               | 31         | Male          | Caucasian        | No                         |
| 3B09               | 42         | Male          | African American | Yes (7.5)                  |
| 3B10               | 65         | Male          | Caucasian        | No                         |
| 3B11               | 50         | Female        | African American | Yes (14)                   |
