# Supplementary material
Source: PubMed Central journal article supplement (PMC3208663)
Supplement: supp_184_8_957__4.pdf [file supp_184_8_957__4.pdf]

|                                                                                                                                                                                                                                                                                                                                                                                                                                                                                                                                                                                                                                                                                                                                                                                                                                                                                                                                                                                                                                                                                                                                                                                                                                                                                                                                                                                                                                                                                                                                                                                                                                                                                                                                                                                                                                                                                                                                                                                                                                                                                                                                                                                                                                                                                                                                                                                                                                                                                                                                                                                                                                                                                                                                                                                                                                                                                                                                                                                                                                                                                                                                                                                                                                                                                                                                                                                                                                                                                                                                                                                                                                                                                                                                                                                                                                                                                                                                                                                                                                                                                                                                                                                                                                                                                                                                                                                                                                                                                                                                                                                                                                                                                                                                                                                                                                                                                                                                                                                                                                                                                                                                                                                                                                                                                                                                                                                                                                                                                                                                                                                                                                                                                                                                                                                                                                                                                                                                                                                                                                                                                                                                                                                                                                                                                                                                                                                                                                                                                                                                                                                                                                                                                                                                                                                                                                                                                                                                                                                                                                                                                                                                                                                                                                                                                                                                                                                                                                                                                                                                                                                                                                                                                                                                                                                                                                                                                                                                                                                                                                                                                                                                                                                                                         |  |  |  |  |  |  |  |
|-------------------------------------------------------------------------------------------------------------------------------------------------------------------------------------------------------------------------------------------------------------------------------------------------------------------------------------------------------------------------------------------------------------------------------------------------------------------------------------------------------------------------------------------------------------------------------------------------------------------------------------------------------------------------------------------------------------------------------------------------------------------------------------------------------------------------------------------------------------------------------------------------------------------------------------------------------------------------------------------------------------------------------------------------------------------------------------------------------------------------------------------------------------------------------------------------------------------------------------------------------------------------------------------------------------------------------------------------------------------------------------------------------------------------------------------------------------------------------------------------------------------------------------------------------------------------------------------------------------------------------------------------------------------------------------------------------------------------------------------------------------------------------------------------------------------------------------------------------------------------------------------------------------------------------------------------------------------------------------------------------------------------------------------------------------------------------------------------------------------------------------------------------------------------------------------------------------------------------------------------------------------------------------------------------------------------------------------------------------------------------------------------------------------------------------------------------------------------------------------------------------------------------------------------------------------------------------------------------------------------------------------------------------------------------------------------------------------------------------------------------------------------------------------------------------------------------------------------------------------------------------------------------------------------------------------------------------------------------------------------------------------------------------------------------------------------------------------------------------------------------------------------------------------------------------------------------------------------------------------------------------------------------------------------------------------------------------------------------------------------------------------------------------------------------------------------------------------------------------------------------------------------------------------------------------------------------------------------------------------------------------------------------------------------------------------------------------------------------------------------------------------------------------------------------------------------------------------------------------------------------------------------------------------------------------------------------------------------------------------------------------------------------------------------------------------------------------------------------------------------------------------------------------------------------------------------------------------------------------------------------------------------------------------------------------------------------------------------------------------------------------------------------------------------------------------------------------------------------------------------------------------------------------------------------------------------------------------------------------------------------------------------------------------------------------------------------------------------------------------------------------------------------------------------------------------------------------------------------------------------------------------------------------------------------------------------------------------------------------------------------------------------------------------------------------------------------------------------------------------------------------------------------------------------------------------------------------------------------------------------------------------------------------------------------------------------------------------------------------------------------------------------------------------------------------------------------------------------------------------------------------------------------------------------------------------------------------------------------------------------------------------------------------------------------------------------------------------------------------------------------------------------------------------------------------------------------------------------------------------------------------------------------------------------------------------------------------------------------------------------------------------------------------------------------------------------------------------------------------------------------------------------------------------------------------------------------------------------------------------------------------------------------------------------------------------------------------------------------------------------------------------------------------------------------------------------------------------------------------------------------------------------------------------------------------------------------------------------------------------------------------------------------------------------------------------------------------------------------------------------------------------------------------------------------------------------------------------------------------------------------------------------------------------------------------------------------------------------------------------------------------------------------------------------------------------------------------------------------------------------------------------------------------------------------------------------------------------------------------------------------------------------------------------------------------------------------------------------------------------------------------------------------------------------------------------------------------------------------------------------------------------------------------------------------------------------------------------------------------------------------------------------------------------------------------------------------------------------------------------------------------------------------------------------------------------------------------------------------------------------------------------------------------------------------------------------------------------------------------------------------------------------------------------------------------------------------------------------------------------------------------------------------------------------------------------------------------------------|--|--|--|--|--|--|--|
| <p>1<br/>2<br/>3<br/>4<br/>5<br/>6<br/>7<br/>8<br/>9<br/>10<br/>11<br/>12<br/>13<br/>14<br/>15<br/>16<br/>17<br/>18<br/>19<br/>20<br/>21<br/>22<br/>23<br/>24<br/>25<br/>26<br/>27<br/>28<br/>29<br/>30<br/>31<br/>32<br/>33<br/>34<br/>35<br/>36<br/>37<br/>38<br/>39<br/>40<br/>41<br/>42<br/>43<br/>44<br/>45<br/>46<br/>47<br/>48<br/>49<br/>50<br/>51<br/>52<br/>53<br/>54<br/>55<br/>56<br/>57<br/>58<br/>59<br/>60<br/>61<br/>62<br/>63<br/>64<br/>65<br/>66<br/>67<br/>68<br/>69<br/>70<br/>71<br/>72<br/>73<br/>74<br/>75<br/>76<br/>77<br/>78<br/>79<br/>80<br/>81<br/>82<br/>83<br/>84<br/>85<br/>86<br/>87<br/>88<br/>89<br/>90<br/>91<br/>92<br/>93<br/>94<br/>95<br/>96<br/>97<br/>98<br/>99<br/>100<br/>101<br/>102<br/>103<br/>104<br/>105<br/>106<br/>107<br/>108<br/>109<br/>110<br/>111<br/>112<br/>113<br/>114<br/>115<br/>116<br/>117<br/>118<br/>119<br/>120<br/>121<br/>122<br/>123<br/>124<br/>125<br/>126<br/>127<br/>128<br/>129<br/>130<br/>131<br/>132<br/>133<br/>134<br/>135<br/>136<br/>137<br/>138<br/>139<br/>140<br/>141<br/>142<br/>143<br/>144<br/>145<br/>146<br/>147<br/>148<br/>149<br/>150<br/>151<br/>152<br/>153<br/>154<br/>155<br/>156<br/>157<br/>158<br/>159<br/>160<br/>161<br/>162<br/>163<br/>164<br/>165<br/>166<br/>167<br/>168<br/>169<br/>170<br/>171<br/>172<br/>173<br/>174<br/>175<br/>176<br/>177<br/>178<br/>179<br/>180<br/>181<br/>182<br/>183<br/>184<br/>185<br/>186<br/>187<br/>188<br/>189<br/>190<br/>191<br/>192<br/>193<br/>194<br/>195<br/>196<br/>197<br/>198<br/>199<br/>200<br/>201<br/>202<br/>203<br/>204<br/>205<br/>206<br/>207<br/>208<br/>209<br/>210<br/>211<br/>212<br/>213<br/>214<br/>215<br/>216<br/>217<br/>218<br/>219<br/>220<br/>221<br/>222<br/>223<br/>224<br/>225<br/>226<br/>227<br/>228<br/>229<br/>230<br/>231<br/>232<br/>233<br/>234<br/>235<br/>236<br/>237<br/>238<br/>239<br/>240<br/>241<br/>242<br/>243<br/>244<br/>245<br/>246<br/>247<br/>248<br/>249<br/>250<br/>251<br/>252<br/>253<br/>254<br/>255<br/>256<br/>257<br/>258<br/>259<br/>260<br/>261<br/>262<br/>263<br/>264<br/>265<br/>266<br/>267<br/>268<br/>269<br/>270<br/>271<br/>272<br/>273<br/>274<br/>275<br/>276<br/>277<br/>278<br/>279<br/>280<br/>281<br/>282<br/>283<br/>284<br/>285<br/>286<br/>287<br/>288<br/>289<br/>290<br/>291<br/>292<br/>293<br/>294<br/>295<br/>296<br/>297<br/>298<br/>299<br/>300<br/>301<br/>302<br/>303<br/>304<br/>305<br/>306<br/>307<br/>308<br/>309<br/>310<br/>311<br/>312<br/>313<br/>314<br/>315<br/>316<br/>317<br/>318<br/>319<br/>320<br/>321<br/>322<br/>323<br/>324<br/>325<br/>326<br/>327<br/>328<br/>329<br/>330<br/>331<br/>332<br/>333<br/>334<br/>335<br/>336<br/>337<br/>338<br/>339<br/>340<br/>341<br/>342<br/>343<br/>344<br/>345<br/>346<br/>347<br/>348<br/>349<br/>350<br/>351<br/>352<br/>353<br/>354<br/>355<br/>356<br/>357<br/>358<br/>359<br/>360<br/>361<br/>362<br/>363<br/>364<br/>365<br/>366<br/>367<br/>368<br/>369<br/>370<br/>371<br/>372<br/>373<br/>374<br/>375<br/>376<br/>377<br/>378<br/>379<br/>380<br/>381<br/>382<br/>383<br/>384<br/>385<br/>386<br/>387<br/>388<br/>389<br/>390<br/>391<br/>392<br/>393<br/>394<br/>395<br/>396<br/>397<br/>398<br/>399<br/>400<br/>401<br/>402<br/>403<br/>404<br/>405<br/>406<br/>407<br/>408<br/>409<br/>410<br/>411<br/>412<br/>413<br/>414<br/>415<br/>416<br/>417<br/>418<br/>419<br/>420<br/>421<br/>422<br/>423<br/>424<br/>425<br/>426<br/>427<br/>428<br/>429<br/>430<br/>431<br/>432<br/>433<br/>434<br/>435<br/>436<br/>437<br/>438<br/>439<br/>440<br/>441<br/>442<br/>443<br/>444<br/>445<br/>446<br/>447<br/>448<br/>449<br/>450<br/>451<br/>452<br/>453<br/>454<br/>455<br/>456<br/>457<br/>458<br/>459<br/>460<br/>461<br/>462<br/>463<br/>464<br/>465<br/>466<br/>467<br/>468<br/>469<br/>470<br/>471<br/>472<br/>473<br/>474<br/>475<br/>476<br/>477<br/>478<br/>479<br/>480<br/>481<br/>482<br/>483<br/>484<br/>485<br/>486<br/>487<br/>488<br/>489<br/>490<br/>491<br/>492<br/>493<br/>494<br/>495<br/>496<br/>497<br/>498<br/>499<br/>500<br/>501<br/>502<br/>503<br/>504<br/>505<br/>506<br/>507<br/>508<br/>509<br/>510<br/>511<br/>512<br/>513<br/>514<br/>515<br/>516<br/>517<br/>518<br/>519<br/>520<br/>521<br/>522<br/>523<br/>524<br/>525<br/>526<br/>527<br/>528<br/>529<br/>530<br/>531<br/>532<br/>533<br/>534<br/>535<br/>536<br/>537<br/>538<br/>539<br/>540<br/>541<br/>542<br/>543<br/>544<br/>545<br/>546<br/>547<br/>548<br/>549<br/>550<br/>551<br/>552<br/>553<br/>554<br/>555<br/>556<br/>557<br/>558<br/>559<br/>560<br/>561<br/>562<br/>563<br/>564<br/>565<br/>566<br/>567<br/>568<br/>569<br/>570<br/>571<br/>572<br/>573<br/>574<br/>575<br/>576<br/>577<br/>578<br/>579<br/>580<br/>581<br/>582<br/>583<br/>584<br/>585<br/>586<br/>587<br/>588<br/>589<br/>590<br/>591<br/>592<br/>593<br/>594<br/>595<br/>596<br/>597<br/>598<br/>599<br/>600<br/>601<br/>602<br/>603<br/>604<br/>605<br/>606<br/>607<br/>608<br/>609<br/>610<br/>611<br/>612<br/>613<br/>614<br/>615<br/>616<br/>617<br/>618<br/>619<br/>620<br/>621<br/>622<br/>623<br/>624<br/>625<br/>626<br/>627<br/>628<br/>629<br/>630<br/>631<br/>632<br/>633<br/>634<br/>635<br/>636<br/>637<br/>638<br/>639<br/>640<br/>641<br/>642<br/>643<br/>644<br/>645<br/>646<br/>647<br/>648<br/>649<br/>650<br/>651<br/>652<br/>653<br/>654<br/>655<br/>656<br/>657<br/>658<br/>659<br/>660<br/>661<br/>662<br/>663<br/>664<br/>665<br/>666<br/>667<br/>668<br/>669<br/>670<br/>671<br/>672<br/>673<br/>674<br/>675<br/>676<br/>677<br/>678<br/>679<br/>680<br/>681<br/>682<br/>683<br/>684<br/>685<br/>686<br/>687<br/>688<br/>689<br/>690<br/>691<br/>692<br/>693<br/>694<br/>695<br/>696<br/>697<br/>698<br/>699<br/>700<br/>701<br/>702<br/>703<br/>704<br/>705<br/>706<br/>707<br/>708<br/>709<br/>710<br/>711<br/>712<br/>713<br/>714<br/>715<br/>716<br/>717<br/>718<br/>719<br/>720<br/>721<br/>722<br/>723<br/>724<br/>725<br/>726<br/>727<br/>728<br/>729<br/>730<br/>731<br/>732<br/>733<br/>734<br/>735<br/>736<br/>737<br/>738<br/>739<br/>740<br/>741<br/>742<br/>743<br/>744<br/>745<br/>746<br/>747<br/>748<br/>749<br/>750<br/>751<br/>752<br/>753<br/>754<br/>755<br/>756<br/>757<br/>758<br/>759<br/>760<br/>761<br/>762<br/>763<br/>764<br/>765<br/>766<br/>767<br/>768<br/>769<br/>770<br/>771<br/>772<br/>773<br/>774<br/>775<br/>776<br/>777<br/>778<br/>779<br/>780<br/>781<br/>782<br/>783<br/>784<br/>785<br/>786<br/>787<br/>788<br/>789<br/>790<br/>791<br/>792<br/>793<br/>794<br/>795<br/>796<br/>797<br/>798<br/>799<br/>800<br/>801<br/>802<br/>803<br/>804<br/>805<br/>806<br/>807<br/>808<br/>809<br/>810<br/>811<br/>812<br/>813<br/>814<br/>815<br/>816<br/>817<br/>818<br/>819<br/>820<br/>821<br/>822<br/>823<br/>824<br/>825<br/>826<br/>827<br/>828<br/>829<br/>830<br/>831<br/>832<br/>833<br/>834<br/>835<br/>836<br/>837<br/>838<br/>839<br/>840<br/>841<br/>842<br/>843<br/>844<br/>845<br/>846<br/>847<br/>848<br/>849<br/>850<br/>851<br/>852<br/>853<br/>854<br/>855<br/>856<br/>857<br/>858<br/>859<br/>860<br/>861<br/>862<br/>863<br/>864<br/>865<br/>866<br/>867<br/>868<br/>869<br/>870<br/>871<br/>872<br/>873<br/>874<br/>875<br/>876<br/>877<br/>878<br/>879<br/>880<br/>881<br/>882<br/>883<br/>884<br/>885<br/>886<br/>887<br/>888<br/>889<br/>890<br/>891<br/>892<br/>893<br/>894<br/>895<br/>896<br/>897<br/>898<br/>899<br/>900<br/>901<br/>902<br/>903<br/>904<br/>905<br/>906<br/>907<br/>908<br/>909<br/>910<br/>911<br/>912<br/>913<br/>914<br/>915<br/>916<br/>917<br/>918<br/>919<br/>920<br/>921<br/>922<br/>923<br/>924<br/>925<br/>926<br/>927<br/>928<br/>929<br/>930<br/>931<br/>932<br/>933<br/>934<br/>935<br/>936<br/>937<br/>938<br/>939<br/>940<br/>941<br/>942<br/>943<br/>944<br/>945<br/>946<br/>947<br/>948<br/>949<br/>950<br/>951<br/>952<br/>953<br/>954<br/>955<br/>956<br/>957<br/>958<br/>959<br/>960<br/>961<br/>962<br/>963<br/>964<br/>965<br/>966<br/>967<br/>968<br/>969<br/>970<br/>971<br/>972<br/>973<br/>974<br/>975<br/>976<br/>977<br/>978<br/>979<br/>980<br/>981<br/>982<br/>983<br/>984<br/>985<br/>986<br/>987<br/>988<br/>989<br/>990<br/>991<br/>992<br/>993<br/>994<br/>995<br/>996<br/>997<br/>998<br/>999<br/>1000</p> |  |  |  |  |  |  |  |
|-------------------------------------------------------------------------------------------------------------------------------------------------------------------------------------------------------------------------------------------------------------------------------------------------------------------------------------------------------------------------------------------------------------------------------------------------------------------------------------------------------------------------------------------------------------------------------------------------------------------------------------------------------------------------------------------------------------------------------------------------------------------------------------------------------------------------------------------------------------------------------------------------------------------------------------------------------------------------------------------------------------------------------------------------------------------------------------------------------------------------------------------------------------------------------------------------------------------------------------------------------------------------------------------------------------------------------------------------------------------------------------------------------------------------------------------------------------------------------------------------------------------------------------------------------------------------------------------------------------------------------------------------------------------------------------------------------------------------------------------------------------------------------------------------------------------------------------------------------------------------------------------------------------------------------------------------------------------------------------------------------------------------------------------------------------------------------------------------------------------------------------------------------------------------------------------------------------------------------------------------------------------------------------------------------------------------------------------------------------------------------------------------------------------------------------------------------------------------------------------------------------------------------------------------------------------------------------------------------------------------------------------------------------------------------------------------------------------------------------------------------------------------------------------------------------------------------------------------------------------------------------------------------------------------------------------------------------------------------------------------------------------------------------------------------------------------------------------------------------------------------------------------------------------------------------------------------------------------------------------------------------------------------------------------------------------------------------------------------------------------------------------------------------------------------------------------------------------------------------------------------------------------------------------------------------------------------------------------------------------------------------------------------------------------------------------------------------------------------------------------------------------------------------------------------------------------------------------------------------------------------------------------------------------------------------------------------------------------------------------------------------------------------------------------------------------------------------------------------------------------------------------------------------------------------------------------------------------------------------------------------------------------------------------------------------------------------------------------------------------------------------------------------------------------------------------------------------------------------------------------------------------------------------------------------------------------------------------------------------------------------------------------------------------------------------------------------------------------------------------------------------------------------------------------------------------------------------------------------------------------------------------------------------------------------------------------------------------------------------------------------------------------------------------------------------------------------------------------------------------------------------------------------------------------------------------------------------------------------------------------------------------------------------------------------------------------------------------------------------------------------------------------------------------------------------------------------------------------------------------------------------------------------------------------------------------------------------------------------------------------------------------------------------------------------------------------------------------------------------------------------------------------------------------------------------------------------------------------------------------------------------------------------------------------------------------------------------------------------------------------------------------------------------------------------------------------------------------------------------------------------------------------------------------------------------------------------------------------------------------------------------------------------------------------------------------------------------------------------------------------------------------------------------------------------------------------------------------------------------------------------------------------------------------------------------------------------------------------------------------------------------------------------------------------------------------------------------------------------------------------------------------------------------------------------------------------------------------------------------------------------------------------------------------------------------------------------------------------------------------------------------------------------------------------------------------------------------------------------------------------------------------------------------------------------------------------------------------------------------------------------------------------------------------------------------------------------------------------------------------------------------------------------------------------------------------------------------------------------------------------------------------------------------------------------------------------------------------------------------------------------------------------------------------------------------------------------------------------------------------------------------------------------------------------------------------------------------------------------------------------------------------------------------------------------------------------------------------------------------------------------------------------------------------------------------------------------------------------------------------------------------------------------------------------------------------------------------------------|--|--|--|--|--|--|--|



|                                                                                                                                                                                                                                                                                                                                                                                                                                                                                                                                                                                                                                                                                                                                                                                                                                                                                                                                                                                                                                                                                                                                                                                                                                                                                                                                                                                                                                                                                                                                                                                                                                                                                                                                                                                                                                                                                                                                                                                                                                                                                                                                                                                                                                                                                                                                                                                                                                                                                                                                                                                                                                                                                                                                                                                                                                                                                                                                                                                                                                                                                                                                                                                                                                                                                                                                                                                                                                                                                                                                                                                                                                                                                                                                                                                                                                                                                                                                                                                                                                                                                                                                                                                                                                                                                                                                                                                                                                                                                                                                                                                                                                                                                                                                                                                                                                                                                                                                                                                                                                                                                                                                                                                                                                                                                                                                                                                                                                                                                                                                                                                                                                                                                                                                                                                                                                                                                                                                                                                                                                                                                                                                                                                                                                                                                                                                                                                                                                                                                                                                                                                                                                                                                                                                                                                                                                                                                                                                                                                                                                                                                                                                                                                                                                                                                                                                                                                                                                                                                                                                                                                                                                                                                                                                                                                                                                                                                                                                                                                                                                                                                                                                                                                                                         |  |  |  |  |  |  |  |
|-------------------------------------------------------------------------------------------------------------------------------------------------------------------------------------------------------------------------------------------------------------------------------------------------------------------------------------------------------------------------------------------------------------------------------------------------------------------------------------------------------------------------------------------------------------------------------------------------------------------------------------------------------------------------------------------------------------------------------------------------------------------------------------------------------------------------------------------------------------------------------------------------------------------------------------------------------------------------------------------------------------------------------------------------------------------------------------------------------------------------------------------------------------------------------------------------------------------------------------------------------------------------------------------------------------------------------------------------------------------------------------------------------------------------------------------------------------------------------------------------------------------------------------------------------------------------------------------------------------------------------------------------------------------------------------------------------------------------------------------------------------------------------------------------------------------------------------------------------------------------------------------------------------------------------------------------------------------------------------------------------------------------------------------------------------------------------------------------------------------------------------------------------------------------------------------------------------------------------------------------------------------------------------------------------------------------------------------------------------------------------------------------------------------------------------------------------------------------------------------------------------------------------------------------------------------------------------------------------------------------------------------------------------------------------------------------------------------------------------------------------------------------------------------------------------------------------------------------------------------------------------------------------------------------------------------------------------------------------------------------------------------------------------------------------------------------------------------------------------------------------------------------------------------------------------------------------------------------------------------------------------------------------------------------------------------------------------------------------------------------------------------------------------------------------------------------------------------------------------------------------------------------------------------------------------------------------------------------------------------------------------------------------------------------------------------------------------------------------------------------------------------------------------------------------------------------------------------------------------------------------------------------------------------------------------------------------------------------------------------------------------------------------------------------------------------------------------------------------------------------------------------------------------------------------------------------------------------------------------------------------------------------------------------------------------------------------------------------------------------------------------------------------------------------------------------------------------------------------------------------------------------------------------------------------------------------------------------------------------------------------------------------------------------------------------------------------------------------------------------------------------------------------------------------------------------------------------------------------------------------------------------------------------------------------------------------------------------------------------------------------------------------------------------------------------------------------------------------------------------------------------------------------------------------------------------------------------------------------------------------------------------------------------------------------------------------------------------------------------------------------------------------------------------------------------------------------------------------------------------------------------------------------------------------------------------------------------------------------------------------------------------------------------------------------------------------------------------------------------------------------------------------------------------------------------------------------------------------------------------------------------------------------------------------------------------------------------------------------------------------------------------------------------------------------------------------------------------------------------------------------------------------------------------------------------------------------------------------------------------------------------------------------------------------------------------------------------------------------------------------------------------------------------------------------------------------------------------------------------------------------------------------------------------------------------------------------------------------------------------------------------------------------------------------------------------------------------------------------------------------------------------------------------------------------------------------------------------------------------------------------------------------------------------------------------------------------------------------------------------------------------------------------------------------------------------------------------------------------------------------------------------------------------------------------------------------------------------------------------------------------------------------------------------------------------------------------------------------------------------------------------------------------------------------------------------------------------------------------------------------------------------------------------------------------------------------------------------------------------------------------------------------------------------------------------------------------------------------------------------------------------------------------------------------------------------------------------------------------------------------------------------------------------------------------------------------------------------------------------------------------------------------------------------------------------------------------------------------------------------------------------------------------------------------------------------------------------------------|--|--|--|--|--|--|--|
| <p>1<br/>2<br/>3<br/>4<br/>5<br/>6<br/>7<br/>8<br/>9<br/>10<br/>11<br/>12<br/>13<br/>14<br/>15<br/>16<br/>17<br/>18<br/>19<br/>20<br/>21<br/>22<br/>23<br/>24<br/>25<br/>26<br/>27<br/>28<br/>29<br/>30<br/>31<br/>32<br/>33<br/>34<br/>35<br/>36<br/>37<br/>38<br/>39<br/>40<br/>41<br/>42<br/>43<br/>44<br/>45<br/>46<br/>47<br/>48<br/>49<br/>50<br/>51<br/>52<br/>53<br/>54<br/>55<br/>56<br/>57<br/>58<br/>59<br/>60<br/>61<br/>62<br/>63<br/>64<br/>65<br/>66<br/>67<br/>68<br/>69<br/>70<br/>71<br/>72<br/>73<br/>74<br/>75<br/>76<br/>77<br/>78<br/>79<br/>80<br/>81<br/>82<br/>83<br/>84<br/>85<br/>86<br/>87<br/>88<br/>89<br/>90<br/>91<br/>92<br/>93<br/>94<br/>95<br/>96<br/>97<br/>98<br/>99<br/>100<br/>101<br/>102<br/>103<br/>104<br/>105<br/>106<br/>107<br/>108<br/>109<br/>110<br/>111<br/>112<br/>113<br/>114<br/>115<br/>116<br/>117<br/>118<br/>119<br/>120<br/>121<br/>122<br/>123<br/>124<br/>125<br/>126<br/>127<br/>128<br/>129<br/>130<br/>131<br/>132<br/>133<br/>134<br/>135<br/>136<br/>137<br/>138<br/>139<br/>140<br/>141<br/>142<br/>143<br/>144<br/>145<br/>146<br/>147<br/>148<br/>149<br/>150<br/>151<br/>152<br/>153<br/>154<br/>155<br/>156<br/>157<br/>158<br/>159<br/>160<br/>161<br/>162<br/>163<br/>164<br/>165<br/>166<br/>167<br/>168<br/>169<br/>170<br/>171<br/>172<br/>173<br/>174<br/>175<br/>176<br/>177<br/>178<br/>179<br/>180<br/>181<br/>182<br/>183<br/>184<br/>185<br/>186<br/>187<br/>188<br/>189<br/>190<br/>191<br/>192<br/>193<br/>194<br/>195<br/>196<br/>197<br/>198<br/>199<br/>200<br/>201<br/>202<br/>203<br/>204<br/>205<br/>206<br/>207<br/>208<br/>209<br/>210<br/>211<br/>212<br/>213<br/>214<br/>215<br/>216<br/>217<br/>218<br/>219<br/>220<br/>221<br/>222<br/>223<br/>224<br/>225<br/>226<br/>227<br/>228<br/>229<br/>230<br/>231<br/>232<br/>233<br/>234<br/>235<br/>236<br/>237<br/>238<br/>239<br/>240<br/>241<br/>242<br/>243<br/>244<br/>245<br/>246<br/>247<br/>248<br/>249<br/>250<br/>251<br/>252<br/>253<br/>254<br/>255<br/>256<br/>257<br/>258<br/>259<br/>260<br/>261<br/>262<br/>263<br/>264<br/>265<br/>266<br/>267<br/>268<br/>269<br/>270<br/>271<br/>272<br/>273<br/>274<br/>275<br/>276<br/>277<br/>278<br/>279<br/>280<br/>281<br/>282<br/>283<br/>284<br/>285<br/>286<br/>287<br/>288<br/>289<br/>290<br/>291<br/>292<br/>293<br/>294<br/>295<br/>296<br/>297<br/>298<br/>299<br/>300<br/>301<br/>302<br/>303<br/>304<br/>305<br/>306<br/>307<br/>308<br/>309<br/>310<br/>311<br/>312<br/>313<br/>314<br/>315<br/>316<br/>317<br/>318<br/>319<br/>320<br/>321<br/>322<br/>323<br/>324<br/>325<br/>326<br/>327<br/>328<br/>329<br/>330<br/>331<br/>332<br/>333<br/>334<br/>335<br/>336<br/>337<br/>338<br/>339<br/>340<br/>341<br/>342<br/>343<br/>344<br/>345<br/>346<br/>347<br/>348<br/>349<br/>350<br/>351<br/>352<br/>353<br/>354<br/>355<br/>356<br/>357<br/>358<br/>359<br/>360<br/>361<br/>362<br/>363<br/>364<br/>365<br/>366<br/>367<br/>368<br/>369<br/>370<br/>371<br/>372<br/>373<br/>374<br/>375<br/>376<br/>377<br/>378<br/>379<br/>380<br/>381<br/>382<br/>383<br/>384<br/>385<br/>386<br/>387<br/>388<br/>389<br/>390<br/>391<br/>392<br/>393<br/>394<br/>395<br/>396<br/>397<br/>398<br/>399<br/>400<br/>401<br/>402<br/>403<br/>404<br/>405<br/>406<br/>407<br/>408<br/>409<br/>410<br/>411<br/>412<br/>413<br/>414<br/>415<br/>416<br/>417<br/>418<br/>419<br/>420<br/>421<br/>422<br/>423<br/>424<br/>425<br/>426<br/>427<br/>428<br/>429<br/>430<br/>431<br/>432<br/>433<br/>434<br/>435<br/>436<br/>437<br/>438<br/>439<br/>440<br/>441<br/>442<br/>443<br/>444<br/>445<br/>446<br/>447<br/>448<br/>449<br/>450<br/>451<br/>452<br/>453<br/>454<br/>455<br/>456<br/>457<br/>458<br/>459<br/>460<br/>461<br/>462<br/>463<br/>464<br/>465<br/>466<br/>467<br/>468<br/>469<br/>470<br/>471<br/>472<br/>473<br/>474<br/>475<br/>476<br/>477<br/>478<br/>479<br/>480<br/>481<br/>482<br/>483<br/>484<br/>485<br/>486<br/>487<br/>488<br/>489<br/>490<br/>491<br/>492<br/>493<br/>494<br/>495<br/>496<br/>497<br/>498<br/>499<br/>500<br/>501<br/>502<br/>503<br/>504<br/>505<br/>506<br/>507<br/>508<br/>509<br/>510<br/>511<br/>512<br/>513<br/>514<br/>515<br/>516<br/>517<br/>518<br/>519<br/>520<br/>521<br/>522<br/>523<br/>524<br/>525<br/>526<br/>527<br/>528<br/>529<br/>530<br/>531<br/>532<br/>533<br/>534<br/>535<br/>536<br/>537<br/>538<br/>539<br/>540<br/>541<br/>542<br/>543<br/>544<br/>545<br/>546<br/>547<br/>548<br/>549<br/>550<br/>551<br/>552<br/>553<br/>554<br/>555<br/>556<br/>557<br/>558<br/>559<br/>560<br/>561<br/>562<br/>563<br/>564<br/>565<br/>566<br/>567<br/>568<br/>569<br/>570<br/>571<br/>572<br/>573<br/>574<br/>575<br/>576<br/>577<br/>578<br/>579<br/>580<br/>581<br/>582<br/>583<br/>584<br/>585<br/>586<br/>587<br/>588<br/>589<br/>590<br/>591<br/>592<br/>593<br/>594<br/>595<br/>596<br/>597<br/>598<br/>599<br/>600<br/>601<br/>602<br/>603<br/>604<br/>605<br/>606<br/>607<br/>608<br/>609<br/>610<br/>611<br/>612<br/>613<br/>614<br/>615<br/>616<br/>617<br/>618<br/>619<br/>620<br/>621<br/>622<br/>623<br/>624<br/>625<br/>626<br/>627<br/>628<br/>629<br/>630<br/>631<br/>632<br/>633<br/>634<br/>635<br/>636<br/>637<br/>638<br/>639<br/>640<br/>641<br/>642<br/>643<br/>644<br/>645<br/>646<br/>647<br/>648<br/>649<br/>650<br/>651<br/>652<br/>653<br/>654<br/>655<br/>656<br/>657<br/>658<br/>659<br/>660<br/>661<br/>662<br/>663<br/>664<br/>665<br/>666<br/>667<br/>668<br/>669<br/>670<br/>671<br/>672<br/>673<br/>674<br/>675<br/>676<br/>677<br/>678<br/>679<br/>680<br/>681<br/>682<br/>683<br/>684<br/>685<br/>686<br/>687<br/>688<br/>689<br/>690<br/>691<br/>692<br/>693<br/>694<br/>695<br/>696<br/>697<br/>698<br/>699<br/>700<br/>701<br/>702<br/>703<br/>704<br/>705<br/>706<br/>707<br/>708<br/>709<br/>710<br/>711<br/>712<br/>713<br/>714<br/>715<br/>716<br/>717<br/>718<br/>719<br/>720<br/>721<br/>722<br/>723<br/>724<br/>725<br/>726<br/>727<br/>728<br/>729<br/>730<br/>731<br/>732<br/>733<br/>734<br/>735<br/>736<br/>737<br/>738<br/>739<br/>740<br/>741<br/>742<br/>743<br/>744<br/>745<br/>746<br/>747<br/>748<br/>749<br/>750<br/>751<br/>752<br/>753<br/>754<br/>755<br/>756<br/>757<br/>758<br/>759<br/>760<br/>761<br/>762<br/>763<br/>764<br/>765<br/>766<br/>767<br/>768<br/>769<br/>770<br/>771<br/>772<br/>773<br/>774<br/>775<br/>776<br/>777<br/>778<br/>779<br/>780<br/>781<br/>782<br/>783<br/>784<br/>785<br/>786<br/>787<br/>788<br/>789<br/>790<br/>791<br/>792<br/>793<br/>794<br/>795<br/>796<br/>797<br/>798<br/>799<br/>800<br/>801<br/>802<br/>803<br/>804<br/>805<br/>806<br/>807<br/>808<br/>809<br/>810<br/>811<br/>812<br/>813<br/>814<br/>815<br/>816<br/>817<br/>818<br/>819<br/>820<br/>821<br/>822<br/>823<br/>824<br/>825<br/>826<br/>827<br/>828<br/>829<br/>830<br/>831<br/>832<br/>833<br/>834<br/>835<br/>836<br/>837<br/>838<br/>839<br/>840<br/>841<br/>842<br/>843<br/>844<br/>845<br/>846<br/>847<br/>848<br/>849<br/>850<br/>851<br/>852<br/>853<br/>854<br/>855<br/>856<br/>857<br/>858<br/>859<br/>860<br/>861<br/>862<br/>863<br/>864<br/>865<br/>866<br/>867<br/>868<br/>869<br/>870<br/>871<br/>872<br/>873<br/>874<br/>875<br/>876<br/>877<br/>878<br/>879<br/>880<br/>881<br/>882<br/>883<br/>884<br/>885<br/>886<br/>887<br/>888<br/>889<br/>890<br/>891<br/>892<br/>893<br/>894<br/>895<br/>896<br/>897<br/>898<br/>899<br/>900<br/>901<br/>902<br/>903<br/>904<br/>905<br/>906<br/>907<br/>908<br/>909<br/>910<br/>911<br/>912<br/>913<br/>914<br/>915<br/>916<br/>917<br/>918<br/>919<br/>920<br/>921<br/>922<br/>923<br/>924<br/>925<br/>926<br/>927<br/>928<br/>929<br/>930<br/>931<br/>932<br/>933<br/>934<br/>935<br/>936<br/>937<br/>938<br/>939<br/>940<br/>941<br/>942<br/>943<br/>944<br/>945<br/>946<br/>947<br/>948<br/>949<br/>950<br/>951<br/>952<br/>953<br/>954<br/>955<br/>956<br/>957<br/>958<br/>959<br/>960<br/>961<br/>962<br/>963<br/>964<br/>965<br/>966<br/>967<br/>968<br/>969<br/>970<br/>971<br/>972<br/>973<br/>974<br/>975<br/>976<br/>977<br/>978<br/>979<br/>980<br/>981<br/>982<br/>983<br/>984<br/>985<br/>986<br/>987<br/>988<br/>989<br/>990<br/>991<br/>992<br/>993<br/>994<br/>995<br/>996<br/>997<br/>998<br/>999<br/>1000</p> |  |  |  |  |  |  |  |
|-------------------------------------------------------------------------------------------------------------------------------------------------------------------------------------------------------------------------------------------------------------------------------------------------------------------------------------------------------------------------------------------------------------------------------------------------------------------------------------------------------------------------------------------------------------------------------------------------------------------------------------------------------------------------------------------------------------------------------------------------------------------------------------------------------------------------------------------------------------------------------------------------------------------------------------------------------------------------------------------------------------------------------------------------------------------------------------------------------------------------------------------------------------------------------------------------------------------------------------------------------------------------------------------------------------------------------------------------------------------------------------------------------------------------------------------------------------------------------------------------------------------------------------------------------------------------------------------------------------------------------------------------------------------------------------------------------------------------------------------------------------------------------------------------------------------------------------------------------------------------------------------------------------------------------------------------------------------------------------------------------------------------------------------------------------------------------------------------------------------------------------------------------------------------------------------------------------------------------------------------------------------------------------------------------------------------------------------------------------------------------------------------------------------------------------------------------------------------------------------------------------------------------------------------------------------------------------------------------------------------------------------------------------------------------------------------------------------------------------------------------------------------------------------------------------------------------------------------------------------------------------------------------------------------------------------------------------------------------------------------------------------------------------------------------------------------------------------------------------------------------------------------------------------------------------------------------------------------------------------------------------------------------------------------------------------------------------------------------------------------------------------------------------------------------------------------------------------------------------------------------------------------------------------------------------------------------------------------------------------------------------------------------------------------------------------------------------------------------------------------------------------------------------------------------------------------------------------------------------------------------------------------------------------------------------------------------------------------------------------------------------------------------------------------------------------------------------------------------------------------------------------------------------------------------------------------------------------------------------------------------------------------------------------------------------------------------------------------------------------------------------------------------------------------------------------------------------------------------------------------------------------------------------------------------------------------------------------------------------------------------------------------------------------------------------------------------------------------------------------------------------------------------------------------------------------------------------------------------------------------------------------------------------------------------------------------------------------------------------------------------------------------------------------------------------------------------------------------------------------------------------------------------------------------------------------------------------------------------------------------------------------------------------------------------------------------------------------------------------------------------------------------------------------------------------------------------------------------------------------------------------------------------------------------------------------------------------------------------------------------------------------------------------------------------------------------------------------------------------------------------------------------------------------------------------------------------------------------------------------------------------------------------------------------------------------------------------------------------------------------------------------------------------------------------------------------------------------------------------------------------------------------------------------------------------------------------------------------------------------------------------------------------------------------------------------------------------------------------------------------------------------------------------------------------------------------------------------------------------------------------------------------------------------------------------------------------------------------------------------------------------------------------------------------------------------------------------------------------------------------------------------------------------------------------------------------------------------------------------------------------------------------------------------------------------------------------------------------------------------------------------------------------------------------------------------------------------------------------------------------------------------------------------------------------------------------------------------------------------------------------------------------------------------------------------------------------------------------------------------------------------------------------------------------------------------------------------------------------------------------------------------------------------------------------------------------------------------------------------------------------------------------------------------------------------------------------------------------------------------------------------------------------------------------------------------------------------------------------------------------------------------------------------------------------------------------------------------------------------------------------------------------------------------------------------------------------------------------------------------------------------------------------------------------------------------------------------------------|--|--|--|--|--|--|--|

|                                                                                                                                                                                                                                                                                                                                                                                                                                                                                                                                                                                                                                                                                                                                                                                                                                                                                                                                                                                                                                                                                                                                                                                                                                                                                                                                                                                                                                                                                                                                                                                                                                                                                                                                                                                                                                                                                                                                                                                                                                                                                                                                                                                                                                                                                                                                                                                                                                                                                                                                                                                                                                                                                                                                                                                                                                                                                                                                                                                                                                                                                                                                                                                                                                                                                                                                                                                                                                                                                                                                                                                                                                                                                                                                                                                                                                                                                                                                                                                                                                                                                                                                                                                                                                                                                                                                                                                                                                                                                                                                                                                                                                                                                                                                                                                                                                                                                                                                                                                                                                                                                                                                                                                                                                                                                                                                                                                                                                                                                                                                                                                                                                                                                                                                                                                                                                                                                                                                                                                                                                                                                                                                                                                                                                                                                                                                                                                                                                                                                                                                                                                                                                                                                                                                                                                                                                                                                                                                                                                                                                                                                                                                                                                                                                                                                                                                                                                                                                                                                                                                                                                                                                                                                                                                                                                                                                                                                                                                                                                                                                                                                                                                                                                                                         |  |  |  |  |  |  |  |
|-------------------------------------------------------------------------------------------------------------------------------------------------------------------------------------------------------------------------------------------------------------------------------------------------------------------------------------------------------------------------------------------------------------------------------------------------------------------------------------------------------------------------------------------------------------------------------------------------------------------------------------------------------------------------------------------------------------------------------------------------------------------------------------------------------------------------------------------------------------------------------------------------------------------------------------------------------------------------------------------------------------------------------------------------------------------------------------------------------------------------------------------------------------------------------------------------------------------------------------------------------------------------------------------------------------------------------------------------------------------------------------------------------------------------------------------------------------------------------------------------------------------------------------------------------------------------------------------------------------------------------------------------------------------------------------------------------------------------------------------------------------------------------------------------------------------------------------------------------------------------------------------------------------------------------------------------------------------------------------------------------------------------------------------------------------------------------------------------------------------------------------------------------------------------------------------------------------------------------------------------------------------------------------------------------------------------------------------------------------------------------------------------------------------------------------------------------------------------------------------------------------------------------------------------------------------------------------------------------------------------------------------------------------------------------------------------------------------------------------------------------------------------------------------------------------------------------------------------------------------------------------------------------------------------------------------------------------------------------------------------------------------------------------------------------------------------------------------------------------------------------------------------------------------------------------------------------------------------------------------------------------------------------------------------------------------------------------------------------------------------------------------------------------------------------------------------------------------------------------------------------------------------------------------------------------------------------------------------------------------------------------------------------------------------------------------------------------------------------------------------------------------------------------------------------------------------------------------------------------------------------------------------------------------------------------------------------------------------------------------------------------------------------------------------------------------------------------------------------------------------------------------------------------------------------------------------------------------------------------------------------------------------------------------------------------------------------------------------------------------------------------------------------------------------------------------------------------------------------------------------------------------------------------------------------------------------------------------------------------------------------------------------------------------------------------------------------------------------------------------------------------------------------------------------------------------------------------------------------------------------------------------------------------------------------------------------------------------------------------------------------------------------------------------------------------------------------------------------------------------------------------------------------------------------------------------------------------------------------------------------------------------------------------------------------------------------------------------------------------------------------------------------------------------------------------------------------------------------------------------------------------------------------------------------------------------------------------------------------------------------------------------------------------------------------------------------------------------------------------------------------------------------------------------------------------------------------------------------------------------------------------------------------------------------------------------------------------------------------------------------------------------------------------------------------------------------------------------------------------------------------------------------------------------------------------------------------------------------------------------------------------------------------------------------------------------------------------------------------------------------------------------------------------------------------------------------------------------------------------------------------------------------------------------------------------------------------------------------------------------------------------------------------------------------------------------------------------------------------------------------------------------------------------------------------------------------------------------------------------------------------------------------------------------------------------------------------------------------------------------------------------------------------------------------------------------------------------------------------------------------------------------------------------------------------------------------------------------------------------------------------------------------------------------------------------------------------------------------------------------------------------------------------------------------------------------------------------------------------------------------------------------------------------------------------------------------------------------------------------------------------------------------------------------------------------------------------------------------------------------------------------------------------------------------------------------------------------------------------------------------------------------------------------------------------------------------------------------------------------------------------------------------------------------------------------------------------------------------------------------------------------------------------------------------------------------------------------------------|--|--|--|--|--|--|--|
| <p>1<br/>2<br/>3<br/>4<br/>5<br/>6<br/>7<br/>8<br/>9<br/>10<br/>11<br/>12<br/>13<br/>14<br/>15<br/>16<br/>17<br/>18<br/>19<br/>20<br/>21<br/>22<br/>23<br/>24<br/>25<br/>26<br/>27<br/>28<br/>29<br/>30<br/>31<br/>32<br/>33<br/>34<br/>35<br/>36<br/>37<br/>38<br/>39<br/>40<br/>41<br/>42<br/>43<br/>44<br/>45<br/>46<br/>47<br/>48<br/>49<br/>50<br/>51<br/>52<br/>53<br/>54<br/>55<br/>56<br/>57<br/>58<br/>59<br/>60<br/>61<br/>62<br/>63<br/>64<br/>65<br/>66<br/>67<br/>68<br/>69<br/>70<br/>71<br/>72<br/>73<br/>74<br/>75<br/>76<br/>77<br/>78<br/>79<br/>80<br/>81<br/>82<br/>83<br/>84<br/>85<br/>86<br/>87<br/>88<br/>89<br/>90<br/>91<br/>92<br/>93<br/>94<br/>95<br/>96<br/>97<br/>98<br/>99<br/>100<br/>101<br/>102<br/>103<br/>104<br/>105<br/>106<br/>107<br/>108<br/>109<br/>110<br/>111<br/>112<br/>113<br/>114<br/>115<br/>116<br/>117<br/>118<br/>119<br/>120<br/>121<br/>122<br/>123<br/>124<br/>125<br/>126<br/>127<br/>128<br/>129<br/>130<br/>131<br/>132<br/>133<br/>134<br/>135<br/>136<br/>137<br/>138<br/>139<br/>140<br/>141<br/>142<br/>143<br/>144<br/>145<br/>146<br/>147<br/>148<br/>149<br/>150<br/>151<br/>152<br/>153<br/>154<br/>155<br/>156<br/>157<br/>158<br/>159<br/>160<br/>161<br/>162<br/>163<br/>164<br/>165<br/>166<br/>167<br/>168<br/>169<br/>170<br/>171<br/>172<br/>173<br/>174<br/>175<br/>176<br/>177<br/>178<br/>179<br/>180<br/>181<br/>182<br/>183<br/>184<br/>185<br/>186<br/>187<br/>188<br/>189<br/>190<br/>191<br/>192<br/>193<br/>194<br/>195<br/>196<br/>197<br/>198<br/>199<br/>200<br/>201<br/>202<br/>203<br/>204<br/>205<br/>206<br/>207<br/>208<br/>209<br/>210<br/>211<br/>212<br/>213<br/>214<br/>215<br/>216<br/>217<br/>218<br/>219<br/>220<br/>221<br/>222<br/>223<br/>224<br/>225<br/>226<br/>227<br/>228<br/>229<br/>230<br/>231<br/>232<br/>233<br/>234<br/>235<br/>236<br/>237<br/>238<br/>239<br/>240<br/>241<br/>242<br/>243<br/>244<br/>245<br/>246<br/>247<br/>248<br/>249<br/>250<br/>251<br/>252<br/>253<br/>254<br/>255<br/>256<br/>257<br/>258<br/>259<br/>260<br/>261<br/>262<br/>263<br/>264<br/>265<br/>266<br/>267<br/>268<br/>269<br/>270<br/>271<br/>272<br/>273<br/>274<br/>275<br/>276<br/>277<br/>278<br/>279<br/>280<br/>281<br/>282<br/>283<br/>284<br/>285<br/>286<br/>287<br/>288<br/>289<br/>290<br/>291<br/>292<br/>293<br/>294<br/>295<br/>296<br/>297<br/>298<br/>299<br/>300<br/>301<br/>302<br/>303<br/>304<br/>305<br/>306<br/>307<br/>308<br/>309<br/>310<br/>311<br/>312<br/>313<br/>314<br/>315<br/>316<br/>317<br/>318<br/>319<br/>320<br/>321<br/>322<br/>323<br/>324<br/>325<br/>326<br/>327<br/>328<br/>329<br/>330<br/>331<br/>332<br/>333<br/>334<br/>335<br/>336<br/>337<br/>338<br/>339<br/>340<br/>341<br/>342<br/>343<br/>344<br/>345<br/>346<br/>347<br/>348<br/>349<br/>350<br/>351<br/>352<br/>353<br/>354<br/>355<br/>356<br/>357<br/>358<br/>359<br/>360<br/>361<br/>362<br/>363<br/>364<br/>365<br/>366<br/>367<br/>368<br/>369<br/>370<br/>371<br/>372<br/>373<br/>374<br/>375<br/>376<br/>377<br/>378<br/>379<br/>380<br/>381<br/>382<br/>383<br/>384<br/>385<br/>386<br/>387<br/>388<br/>389<br/>390<br/>391<br/>392<br/>393<br/>394<br/>395<br/>396<br/>397<br/>398<br/>399<br/>400<br/>401<br/>402<br/>403<br/>404<br/>405<br/>406<br/>407<br/>408<br/>409<br/>410<br/>411<br/>412<br/>413<br/>414<br/>415<br/>416<br/>417<br/>418<br/>419<br/>420<br/>421<br/>422<br/>423<br/>424<br/>425<br/>426<br/>427<br/>428<br/>429<br/>430<br/>431<br/>432<br/>433<br/>434<br/>435<br/>436<br/>437<br/>438<br/>439<br/>440<br/>441<br/>442<br/>443<br/>444<br/>445<br/>446<br/>447<br/>448<br/>449<br/>450<br/>451<br/>452<br/>453<br/>454<br/>455<br/>456<br/>457<br/>458<br/>459<br/>460<br/>461<br/>462<br/>463<br/>464<br/>465<br/>466<br/>467<br/>468<br/>469<br/>470<br/>471<br/>472<br/>473<br/>474<br/>475<br/>476<br/>477<br/>478<br/>479<br/>480<br/>481<br/>482<br/>483<br/>484<br/>485<br/>486<br/>487<br/>488<br/>489<br/>490<br/>491<br/>492<br/>493<br/>494<br/>495<br/>496<br/>497<br/>498<br/>499<br/>500<br/>501<br/>502<br/>503<br/>504<br/>505<br/>506<br/>507<br/>508<br/>509<br/>510<br/>511<br/>512<br/>513<br/>514<br/>515<br/>516<br/>517<br/>518<br/>519<br/>520<br/>521<br/>522<br/>523<br/>524<br/>525<br/>526<br/>527<br/>528<br/>529<br/>530<br/>531<br/>532<br/>533<br/>534<br/>535<br/>536<br/>537<br/>538<br/>539<br/>540<br/>541<br/>542<br/>543<br/>544<br/>545<br/>546<br/>547<br/>548<br/>549<br/>550<br/>551<br/>552<br/>553<br/>554<br/>555<br/>556<br/>557<br/>558<br/>559<br/>560<br/>561<br/>562<br/>563<br/>564<br/>565<br/>566<br/>567<br/>568<br/>569<br/>570<br/>571<br/>572<br/>573<br/>574<br/>575<br/>576<br/>577<br/>578<br/>579<br/>580<br/>581<br/>582<br/>583<br/>584<br/>585<br/>586<br/>587<br/>588<br/>589<br/>590<br/>591<br/>592<br/>593<br/>594<br/>595<br/>596<br/>597<br/>598<br/>599<br/>600<br/>601<br/>602<br/>603<br/>604<br/>605<br/>606<br/>607<br/>608<br/>609<br/>610<br/>611<br/>612<br/>613<br/>614<br/>615<br/>616<br/>617<br/>618<br/>619<br/>620<br/>621<br/>622<br/>623<br/>624<br/>625<br/>626<br/>627<br/>628<br/>629<br/>630<br/>631<br/>632<br/>633<br/>634<br/>635<br/>636<br/>637<br/>638<br/>639<br/>640<br/>641<br/>642<br/>643<br/>644<br/>645<br/>646<br/>647<br/>648<br/>649<br/>650<br/>651<br/>652<br/>653<br/>654<br/>655<br/>656<br/>657<br/>658<br/>659<br/>660<br/>661<br/>662<br/>663<br/>664<br/>665<br/>666<br/>667<br/>668<br/>669<br/>670<br/>671<br/>672<br/>673<br/>674<br/>675<br/>676<br/>677<br/>678<br/>679<br/>680<br/>681<br/>682<br/>683<br/>684<br/>685<br/>686<br/>687<br/>688<br/>689<br/>690<br/>691<br/>692<br/>693<br/>694<br/>695<br/>696<br/>697<br/>698<br/>699<br/>700<br/>701<br/>702<br/>703<br/>704<br/>705<br/>706<br/>707<br/>708<br/>709<br/>710<br/>711<br/>712<br/>713<br/>714<br/>715<br/>716<br/>717<br/>718<br/>719<br/>720<br/>721<br/>722<br/>723<br/>724<br/>725<br/>726<br/>727<br/>728<br/>729<br/>730<br/>731<br/>732<br/>733<br/>734<br/>735<br/>736<br/>737<br/>738<br/>739<br/>740<br/>741<br/>742<br/>743<br/>744<br/>745<br/>746<br/>747<br/>748<br/>749<br/>750<br/>751<br/>752<br/>753<br/>754<br/>755<br/>756<br/>757<br/>758<br/>759<br/>760<br/>761<br/>762<br/>763<br/>764<br/>765<br/>766<br/>767<br/>768<br/>769<br/>770<br/>771<br/>772<br/>773<br/>774<br/>775<br/>776<br/>777<br/>778<br/>779<br/>780<br/>781<br/>782<br/>783<br/>784<br/>785<br/>786<br/>787<br/>788<br/>789<br/>790<br/>791<br/>792<br/>793<br/>794<br/>795<br/>796<br/>797<br/>798<br/>799<br/>800<br/>801<br/>802<br/>803<br/>804<br/>805<br/>806<br/>807<br/>808<br/>809<br/>810<br/>811<br/>812<br/>813<br/>814<br/>815<br/>816<br/>817<br/>818<br/>819<br/>820<br/>821<br/>822<br/>823<br/>824<br/>825<br/>826<br/>827<br/>828<br/>829<br/>830<br/>831<br/>832<br/>833<br/>834<br/>835<br/>836<br/>837<br/>838<br/>839<br/>840<br/>841<br/>842<br/>843<br/>844<br/>845<br/>846<br/>847<br/>848<br/>849<br/>850<br/>851<br/>852<br/>853<br/>854<br/>855<br/>856<br/>857<br/>858<br/>859<br/>860<br/>861<br/>862<br/>863<br/>864<br/>865<br/>866<br/>867<br/>868<br/>869<br/>870<br/>871<br/>872<br/>873<br/>874<br/>875<br/>876<br/>877<br/>878<br/>879<br/>880<br/>881<br/>882<br/>883<br/>884<br/>885<br/>886<br/>887<br/>888<br/>889<br/>890<br/>891<br/>892<br/>893<br/>894<br/>895<br/>896<br/>897<br/>898<br/>899<br/>900<br/>901<br/>902<br/>903<br/>904<br/>905<br/>906<br/>907<br/>908<br/>909<br/>910<br/>911<br/>912<br/>913<br/>914<br/>915<br/>916<br/>917<br/>918<br/>919<br/>920<br/>921<br/>922<br/>923<br/>924<br/>925<br/>926<br/>927<br/>928<br/>929<br/>930<br/>931<br/>932<br/>933<br/>934<br/>935<br/>936<br/>937<br/>938<br/>939<br/>940<br/>941<br/>942<br/>943<br/>944<br/>945<br/>946<br/>947<br/>948<br/>949<br/>950<br/>951<br/>952<br/>953<br/>954<br/>955<br/>956<br/>957<br/>958<br/>959<br/>960<br/>961<br/>962<br/>963<br/>964<br/>965<br/>966<br/>967<br/>968<br/>969<br/>970<br/>971<br/>972<br/>973<br/>974<br/>975<br/>976<br/>977<br/>978<br/>979<br/>980<br/>981<br/>982<br/>983<br/>984<br/>985<br/>986<br/>987<br/>988<br/>989<br/>990<br/>991<br/>992<br/>993<br/>994<br/>995<br/>996<br/>997<br/>998<br/>999<br/>1000</p> |  |  |  |  |  |  |  |
|-------------------------------------------------------------------------------------------------------------------------------------------------------------------------------------------------------------------------------------------------------------------------------------------------------------------------------------------------------------------------------------------------------------------------------------------------------------------------------------------------------------------------------------------------------------------------------------------------------------------------------------------------------------------------------------------------------------------------------------------------------------------------------------------------------------------------------------------------------------------------------------------------------------------------------------------------------------------------------------------------------------------------------------------------------------------------------------------------------------------------------------------------------------------------------------------------------------------------------------------------------------------------------------------------------------------------------------------------------------------------------------------------------------------------------------------------------------------------------------------------------------------------------------------------------------------------------------------------------------------------------------------------------------------------------------------------------------------------------------------------------------------------------------------------------------------------------------------------------------------------------------------------------------------------------------------------------------------------------------------------------------------------------------------------------------------------------------------------------------------------------------------------------------------------------------------------------------------------------------------------------------------------------------------------------------------------------------------------------------------------------------------------------------------------------------------------------------------------------------------------------------------------------------------------------------------------------------------------------------------------------------------------------------------------------------------------------------------------------------------------------------------------------------------------------------------------------------------------------------------------------------------------------------------------------------------------------------------------------------------------------------------------------------------------------------------------------------------------------------------------------------------------------------------------------------------------------------------------------------------------------------------------------------------------------------------------------------------------------------------------------------------------------------------------------------------------------------------------------------------------------------------------------------------------------------------------------------------------------------------------------------------------------------------------------------------------------------------------------------------------------------------------------------------------------------------------------------------------------------------------------------------------------------------------------------------------------------------------------------------------------------------------------------------------------------------------------------------------------------------------------------------------------------------------------------------------------------------------------------------------------------------------------------------------------------------------------------------------------------------------------------------------------------------------------------------------------------------------------------------------------------------------------------------------------------------------------------------------------------------------------------------------------------------------------------------------------------------------------------------------------------------------------------------------------------------------------------------------------------------------------------------------------------------------------------------------------------------------------------------------------------------------------------------------------------------------------------------------------------------------------------------------------------------------------------------------------------------------------------------------------------------------------------------------------------------------------------------------------------------------------------------------------------------------------------------------------------------------------------------------------------------------------------------------------------------------------------------------------------------------------------------------------------------------------------------------------------------------------------------------------------------------------------------------------------------------------------------------------------------------------------------------------------------------------------------------------------------------------------------------------------------------------------------------------------------------------------------------------------------------------------------------------------------------------------------------------------------------------------------------------------------------------------------------------------------------------------------------------------------------------------------------------------------------------------------------------------------------------------------------------------------------------------------------------------------------------------------------------------------------------------------------------------------------------------------------------------------------------------------------------------------------------------------------------------------------------------------------------------------------------------------------------------------------------------------------------------------------------------------------------------------------------------------------------------------------------------------------------------------------------------------------------------------------------------------------------------------------------------------------------------------------------------------------------------------------------------------------------------------------------------------------------------------------------------------------------------------------------------------------------------------------------------------------------------------------------------------------------------------------------------------------------------------------------------------------------------------------------------------------------------------------------------------------------------------------------------------------------------------------------------------------------------------------------------------------------------------------------------------------------------------------------------------------------------------------------------------------------------------------------------------------------------------------------------------------------------------------|--|--|--|--|--|--|--|

|                                                                                                                                                                                                                                                                                                                                                                                                                                                                                                                                                                                                                                                                                                                                                                                                                                                                                                                                                                                                                                                                                                                                                                                                                                                                                                                                                                                                                                                                                                                                                                                                                                                                                                                                                                                                                                                                                                                                                                                                                                                                                                                                                                                                                                                                                                                                                                                                                                                                                                                                                                                                                                                                                                                                                                                                                                                                                                                                                                                                                                                                                                                                                                                                                                                                                                                                                                                                                                                                                                                                                                                                                                                                                                                                                                                                                                                                                                                                                                                                                                                                                                                                                                                                                                                                                                                                                                                                                                                                                                                                                                                                                                                                                                                                                                                                                                                                                                                                                                                                                                                                                                                                                                                                                                                                                                                                                                                                                                                                                                                                                                                                                                                                                                                                                                                                                                                                                                                                                                                                                                                                                                                                                                                                                                                                                                                                                                                                                                                                                                                                                                                                                                                                                                                                                                                                                                                                                                                                                                                                                                                                                                                                                                                                                                                                                                                                                                                                                                                                                                                                                                                                                                                                                                                                                                                                                                                                                                                                                                                                                                                                                                                                                                                                                         |  |  |  |  |  |  |  |
|-------------------------------------------------------------------------------------------------------------------------------------------------------------------------------------------------------------------------------------------------------------------------------------------------------------------------------------------------------------------------------------------------------------------------------------------------------------------------------------------------------------------------------------------------------------------------------------------------------------------------------------------------------------------------------------------------------------------------------------------------------------------------------------------------------------------------------------------------------------------------------------------------------------------------------------------------------------------------------------------------------------------------------------------------------------------------------------------------------------------------------------------------------------------------------------------------------------------------------------------------------------------------------------------------------------------------------------------------------------------------------------------------------------------------------------------------------------------------------------------------------------------------------------------------------------------------------------------------------------------------------------------------------------------------------------------------------------------------------------------------------------------------------------------------------------------------------------------------------------------------------------------------------------------------------------------------------------------------------------------------------------------------------------------------------------------------------------------------------------------------------------------------------------------------------------------------------------------------------------------------------------------------------------------------------------------------------------------------------------------------------------------------------------------------------------------------------------------------------------------------------------------------------------------------------------------------------------------------------------------------------------------------------------------------------------------------------------------------------------------------------------------------------------------------------------------------------------------------------------------------------------------------------------------------------------------------------------------------------------------------------------------------------------------------------------------------------------------------------------------------------------------------------------------------------------------------------------------------------------------------------------------------------------------------------------------------------------------------------------------------------------------------------------------------------------------------------------------------------------------------------------------------------------------------------------------------------------------------------------------------------------------------------------------------------------------------------------------------------------------------------------------------------------------------------------------------------------------------------------------------------------------------------------------------------------------------------------------------------------------------------------------------------------------------------------------------------------------------------------------------------------------------------------------------------------------------------------------------------------------------------------------------------------------------------------------------------------------------------------------------------------------------------------------------------------------------------------------------------------------------------------------------------------------------------------------------------------------------------------------------------------------------------------------------------------------------------------------------------------------------------------------------------------------------------------------------------------------------------------------------------------------------------------------------------------------------------------------------------------------------------------------------------------------------------------------------------------------------------------------------------------------------------------------------------------------------------------------------------------------------------------------------------------------------------------------------------------------------------------------------------------------------------------------------------------------------------------------------------------------------------------------------------------------------------------------------------------------------------------------------------------------------------------------------------------------------------------------------------------------------------------------------------------------------------------------------------------------------------------------------------------------------------------------------------------------------------------------------------------------------------------------------------------------------------------------------------------------------------------------------------------------------------------------------------------------------------------------------------------------------------------------------------------------------------------------------------------------------------------------------------------------------------------------------------------------------------------------------------------------------------------------------------------------------------------------------------------------------------------------------------------------------------------------------------------------------------------------------------------------------------------------------------------------------------------------------------------------------------------------------------------------------------------------------------------------------------------------------------------------------------------------------------------------------------------------------------------------------------------------------------------------------------------------------------------------------------------------------------------------------------------------------------------------------------------------------------------------------------------------------------------------------------------------------------------------------------------------------------------------------------------------------------------------------------------------------------------------------------------------------------------------------------------------------------------------------------------------------------------------------------------------------------------------------------------------------------------------------------------------------------------------------------------------------------------------------------------------------------------------------------------------------------------------------------------------------------------------------------------------------------------------------------------------------------------------------------------------------|--|--|--|--|--|--|--|
| <p>1<br/>2<br/>3<br/>4<br/>5<br/>6<br/>7<br/>8<br/>9<br/>10<br/>11<br/>12<br/>13<br/>14<br/>15<br/>16<br/>17<br/>18<br/>19<br/>20<br/>21<br/>22<br/>23<br/>24<br/>25<br/>26<br/>27<br/>28<br/>29<br/>30<br/>31<br/>32<br/>33<br/>34<br/>35<br/>36<br/>37<br/>38<br/>39<br/>40<br/>41<br/>42<br/>43<br/>44<br/>45<br/>46<br/>47<br/>48<br/>49<br/>50<br/>51<br/>52<br/>53<br/>54<br/>55<br/>56<br/>57<br/>58<br/>59<br/>60<br/>61<br/>62<br/>63<br/>64<br/>65<br/>66<br/>67<br/>68<br/>69<br/>70<br/>71<br/>72<br/>73<br/>74<br/>75<br/>76<br/>77<br/>78<br/>79<br/>80<br/>81<br/>82<br/>83<br/>84<br/>85<br/>86<br/>87<br/>88<br/>89<br/>90<br/>91<br/>92<br/>93<br/>94<br/>95<br/>96<br/>97<br/>98<br/>99<br/>100<br/>101<br/>102<br/>103<br/>104<br/>105<br/>106<br/>107<br/>108<br/>109<br/>110<br/>111<br/>112<br/>113<br/>114<br/>115<br/>116<br/>117<br/>118<br/>119<br/>120<br/>121<br/>122<br/>123<br/>124<br/>125<br/>126<br/>127<br/>128<br/>129<br/>130<br/>131<br/>132<br/>133<br/>134<br/>135<br/>136<br/>137<br/>138<br/>139<br/>140<br/>141<br/>142<br/>143<br/>144<br/>145<br/>146<br/>147<br/>148<br/>149<br/>150<br/>151<br/>152<br/>153<br/>154<br/>155<br/>156<br/>157<br/>158<br/>159<br/>160<br/>161<br/>162<br/>163<br/>164<br/>165<br/>166<br/>167<br/>168<br/>169<br/>170<br/>171<br/>172<br/>173<br/>174<br/>175<br/>176<br/>177<br/>178<br/>179<br/>180<br/>181<br/>182<br/>183<br/>184<br/>185<br/>186<br/>187<br/>188<br/>189<br/>190<br/>191<br/>192<br/>193<br/>194<br/>195<br/>196<br/>197<br/>198<br/>199<br/>200<br/>201<br/>202<br/>203<br/>204<br/>205<br/>206<br/>207<br/>208<br/>209<br/>210<br/>211<br/>212<br/>213<br/>214<br/>215<br/>216<br/>217<br/>218<br/>219<br/>220<br/>221<br/>222<br/>223<br/>224<br/>225<br/>226<br/>227<br/>228<br/>229<br/>230<br/>231<br/>232<br/>233<br/>234<br/>235<br/>236<br/>237<br/>238<br/>239<br/>240<br/>241<br/>242<br/>243<br/>244<br/>245<br/>246<br/>247<br/>248<br/>249<br/>250<br/>251<br/>252<br/>253<br/>254<br/>255<br/>256<br/>257<br/>258<br/>259<br/>260<br/>261<br/>262<br/>263<br/>264<br/>265<br/>266<br/>267<br/>268<br/>269<br/>270<br/>271<br/>272<br/>273<br/>274<br/>275<br/>276<br/>277<br/>278<br/>279<br/>280<br/>281<br/>282<br/>283<br/>284<br/>285<br/>286<br/>287<br/>288<br/>289<br/>290<br/>291<br/>292<br/>293<br/>294<br/>295<br/>296<br/>297<br/>298<br/>299<br/>300<br/>301<br/>302<br/>303<br/>304<br/>305<br/>306<br/>307<br/>308<br/>309<br/>310<br/>311<br/>312<br/>313<br/>314<br/>315<br/>316<br/>317<br/>318<br/>319<br/>320<br/>321<br/>322<br/>323<br/>324<br/>325<br/>326<br/>327<br/>328<br/>329<br/>330<br/>331<br/>332<br/>333<br/>334<br/>335<br/>336<br/>337<br/>338<br/>339<br/>340<br/>341<br/>342<br/>343<br/>344<br/>345<br/>346<br/>347<br/>348<br/>349<br/>350<br/>351<br/>352<br/>353<br/>354<br/>355<br/>356<br/>357<br/>358<br/>359<br/>360<br/>361<br/>362<br/>363<br/>364<br/>365<br/>366<br/>367<br/>368<br/>369<br/>370<br/>371<br/>372<br/>373<br/>374<br/>375<br/>376<br/>377<br/>378<br/>379<br/>380<br/>381<br/>382<br/>383<br/>384<br/>385<br/>386<br/>387<br/>388<br/>389<br/>390<br/>391<br/>392<br/>393<br/>394<br/>395<br/>396<br/>397<br/>398<br/>399<br/>400<br/>401<br/>402<br/>403<br/>404<br/>405<br/>406<br/>407<br/>408<br/>409<br/>410<br/>411<br/>412<br/>413<br/>414<br/>415<br/>416<br/>417<br/>418<br/>419<br/>420<br/>421<br/>422<br/>423<br/>424<br/>425<br/>426<br/>427<br/>428<br/>429<br/>430<br/>431<br/>432<br/>433<br/>434<br/>435<br/>436<br/>437<br/>438<br/>439<br/>440<br/>441<br/>442<br/>443<br/>444<br/>445<br/>446<br/>447<br/>448<br/>449<br/>450<br/>451<br/>452<br/>453<br/>454<br/>455<br/>456<br/>457<br/>458<br/>459<br/>460<br/>461<br/>462<br/>463<br/>464<br/>465<br/>466<br/>467<br/>468<br/>469<br/>470<br/>471<br/>472<br/>473<br/>474<br/>475<br/>476<br/>477<br/>478<br/>479<br/>480<br/>481<br/>482<br/>483<br/>484<br/>485<br/>486<br/>487<br/>488<br/>489<br/>490<br/>491<br/>492<br/>493<br/>494<br/>495<br/>496<br/>497<br/>498<br/>499<br/>500<br/>501<br/>502<br/>503<br/>504<br/>505<br/>506<br/>507<br/>508<br/>509<br/>510<br/>511<br/>512<br/>513<br/>514<br/>515<br/>516<br/>517<br/>518<br/>519<br/>520<br/>521<br/>522<br/>523<br/>524<br/>525<br/>526<br/>527<br/>528<br/>529<br/>530<br/>531<br/>532<br/>533<br/>534<br/>535<br/>536<br/>537<br/>538<br/>539<br/>540<br/>541<br/>542<br/>543<br/>544<br/>545<br/>546<br/>547<br/>548<br/>549<br/>550<br/>551<br/>552<br/>553<br/>554<br/>555<br/>556<br/>557<br/>558<br/>559<br/>560<br/>561<br/>562<br/>563<br/>564<br/>565<br/>566<br/>567<br/>568<br/>569<br/>570<br/>571<br/>572<br/>573<br/>574<br/>575<br/>576<br/>577<br/>578<br/>579<br/>580<br/>581<br/>582<br/>583<br/>584<br/>585<br/>586<br/>587<br/>588<br/>589<br/>590<br/>591<br/>592<br/>593<br/>594<br/>595<br/>596<br/>597<br/>598<br/>599<br/>600<br/>601<br/>602<br/>603<br/>604<br/>605<br/>606<br/>607<br/>608<br/>609<br/>610<br/>611<br/>612<br/>613<br/>614<br/>615<br/>616<br/>617<br/>618<br/>619<br/>620<br/>621<br/>622<br/>623<br/>624<br/>625<br/>626<br/>627<br/>628<br/>629<br/>630<br/>631<br/>632<br/>633<br/>634<br/>635<br/>636<br/>637<br/>638<br/>639<br/>640<br/>641<br/>642<br/>643<br/>644<br/>645<br/>646<br/>647<br/>648<br/>649<br/>650<br/>651<br/>652<br/>653<br/>654<br/>655<br/>656<br/>657<br/>658<br/>659<br/>660<br/>661<br/>662<br/>663<br/>664<br/>665<br/>666<br/>667<br/>668<br/>669<br/>670<br/>671<br/>672<br/>673<br/>674<br/>675<br/>676<br/>677<br/>678<br/>679<br/>680<br/>681<br/>682<br/>683<br/>684<br/>685<br/>686<br/>687<br/>688<br/>689<br/>690<br/>691<br/>692<br/>693<br/>694<br/>695<br/>696<br/>697<br/>698<br/>699<br/>700<br/>701<br/>702<br/>703<br/>704<br/>705<br/>706<br/>707<br/>708<br/>709<br/>710<br/>711<br/>712<br/>713<br/>714<br/>715<br/>716<br/>717<br/>718<br/>719<br/>720<br/>721<br/>722<br/>723<br/>724<br/>725<br/>726<br/>727<br/>728<br/>729<br/>730<br/>731<br/>732<br/>733<br/>734<br/>735<br/>736<br/>737<br/>738<br/>739<br/>740<br/>741<br/>742<br/>743<br/>744<br/>745<br/>746<br/>747<br/>748<br/>749<br/>750<br/>751<br/>752<br/>753<br/>754<br/>755<br/>756<br/>757<br/>758<br/>759<br/>760<br/>761<br/>762<br/>763<br/>764<br/>765<br/>766<br/>767<br/>768<br/>769<br/>770<br/>771<br/>772<br/>773<br/>774<br/>775<br/>776<br/>777<br/>778<br/>779<br/>780<br/>781<br/>782<br/>783<br/>784<br/>785<br/>786<br/>787<br/>788<br/>789<br/>790<br/>791<br/>792<br/>793<br/>794<br/>795<br/>796<br/>797<br/>798<br/>799<br/>800<br/>801<br/>802<br/>803<br/>804<br/>805<br/>806<br/>807<br/>808<br/>809<br/>810<br/>811<br/>812<br/>813<br/>814<br/>815<br/>816<br/>817<br/>818<br/>819<br/>820<br/>821<br/>822<br/>823<br/>824<br/>825<br/>826<br/>827<br/>828<br/>829<br/>830<br/>831<br/>832<br/>833<br/>834<br/>835<br/>836<br/>837<br/>838<br/>839<br/>840<br/>841<br/>842<br/>843<br/>844<br/>845<br/>846<br/>847<br/>848<br/>849<br/>850<br/>851<br/>852<br/>853<br/>854<br/>855<br/>856<br/>857<br/>858<br/>859<br/>860<br/>861<br/>862<br/>863<br/>864<br/>865<br/>866<br/>867<br/>868<br/>869<br/>870<br/>871<br/>872<br/>873<br/>874<br/>875<br/>876<br/>877<br/>878<br/>879<br/>880<br/>881<br/>882<br/>883<br/>884<br/>885<br/>886<br/>887<br/>888<br/>889<br/>890<br/>891<br/>892<br/>893<br/>894<br/>895<br/>896<br/>897<br/>898<br/>899<br/>900<br/>901<br/>902<br/>903<br/>904<br/>905<br/>906<br/>907<br/>908<br/>909<br/>910<br/>911<br/>912<br/>913<br/>914<br/>915<br/>916<br/>917<br/>918<br/>919<br/>920<br/>921<br/>922<br/>923<br/>924<br/>925<br/>926<br/>927<br/>928<br/>929<br/>930<br/>931<br/>932<br/>933<br/>934<br/>935<br/>936<br/>937<br/>938<br/>939<br/>940<br/>941<br/>942<br/>943<br/>944<br/>945<br/>946<br/>947<br/>948<br/>949<br/>950<br/>951<br/>952<br/>953<br/>954<br/>955<br/>956<br/>957<br/>958<br/>959<br/>960<br/>961<br/>962<br/>963<br/>964<br/>965<br/>966<br/>967<br/>968<br/>969<br/>970<br/>971<br/>972<br/>973<br/>974<br/>975<br/>976<br/>977<br/>978<br/>979<br/>980<br/>981<br/>982<br/>983<br/>984<br/>985<br/>986<br/>987<br/>988<br/>989<br/>990<br/>991<br/>992<br/>993<br/>994<br/>995<br/>996<br/>997<br/>998<br/>999<br/>1000</p> |  |  |  |  |  |  |  |
|-------------------------------------------------------------------------------------------------------------------------------------------------------------------------------------------------------------------------------------------------------------------------------------------------------------------------------------------------------------------------------------------------------------------------------------------------------------------------------------------------------------------------------------------------------------------------------------------------------------------------------------------------------------------------------------------------------------------------------------------------------------------------------------------------------------------------------------------------------------------------------------------------------------------------------------------------------------------------------------------------------------------------------------------------------------------------------------------------------------------------------------------------------------------------------------------------------------------------------------------------------------------------------------------------------------------------------------------------------------------------------------------------------------------------------------------------------------------------------------------------------------------------------------------------------------------------------------------------------------------------------------------------------------------------------------------------------------------------------------------------------------------------------------------------------------------------------------------------------------------------------------------------------------------------------------------------------------------------------------------------------------------------------------------------------------------------------------------------------------------------------------------------------------------------------------------------------------------------------------------------------------------------------------------------------------------------------------------------------------------------------------------------------------------------------------------------------------------------------------------------------------------------------------------------------------------------------------------------------------------------------------------------------------------------------------------------------------------------------------------------------------------------------------------------------------------------------------------------------------------------------------------------------------------------------------------------------------------------------------------------------------------------------------------------------------------------------------------------------------------------------------------------------------------------------------------------------------------------------------------------------------------------------------------------------------------------------------------------------------------------------------------------------------------------------------------------------------------------------------------------------------------------------------------------------------------------------------------------------------------------------------------------------------------------------------------------------------------------------------------------------------------------------------------------------------------------------------------------------------------------------------------------------------------------------------------------------------------------------------------------------------------------------------------------------------------------------------------------------------------------------------------------------------------------------------------------------------------------------------------------------------------------------------------------------------------------------------------------------------------------------------------------------------------------------------------------------------------------------------------------------------------------------------------------------------------------------------------------------------------------------------------------------------------------------------------------------------------------------------------------------------------------------------------------------------------------------------------------------------------------------------------------------------------------------------------------------------------------------------------------------------------------------------------------------------------------------------------------------------------------------------------------------------------------------------------------------------------------------------------------------------------------------------------------------------------------------------------------------------------------------------------------------------------------------------------------------------------------------------------------------------------------------------------------------------------------------------------------------------------------------------------------------------------------------------------------------------------------------------------------------------------------------------------------------------------------------------------------------------------------------------------------------------------------------------------------------------------------------------------------------------------------------------------------------------------------------------------------------------------------------------------------------------------------------------------------------------------------------------------------------------------------------------------------------------------------------------------------------------------------------------------------------------------------------------------------------------------------------------------------------------------------------------------------------------------------------------------------------------------------------------------------------------------------------------------------------------------------------------------------------------------------------------------------------------------------------------------------------------------------------------------------------------------------------------------------------------------------------------------------------------------------------------------------------------------------------------------------------------------------------------------------------------------------------------------------------------------------------------------------------------------------------------------------------------------------------------------------------------------------------------------------------------------------------------------------------------------------------------------------------------------------------------------------------------------------------------------------------------------------------------------------------------------------------------------------------------------------------------------------------------------------------------------------------------------------------------------------------------------------------------------------------------------------------------------------------------------------------------------------------------------------------------------------------------------------------------------------------------------------------------------------------------------------------------------------------------------------|--|--|--|--|--|--|--|





|                                                                                                                                                                                                                                                                                                                                                                                                                                                                                                                                                                                                                                                                                                                                                                                                                                                                                                                                                                                                                                                                                                                                                                                                                                                                                                                                                                                                                                                                                                                                                                                                                                                                                                                                                                                                                                                                                                                                                                                                                                                                                                                                                                                                                                                                                                                                                                                                                                                                                                                                                                                                                                                                                                                                                                                                                                                                                                                                                                                                                                                                                                                                                                                                                                                                                                                                                                                                                                                                                                                                                                                                                                                                                                                                                                                                                                                                                                                                                                                                                                                                                                                                                                                                                                                                                                                                                                                                                                                                                                                                                                                                                                                                                                                                                                                                                                                                                                                                                                                                                                                                                                                                                                                                                                                                                                                                                                                                                                                                                                                                                                                                                                                                                                                                                                                                                                                                                                                                                                                                                                                                                                                                                                                                                                                                                                                                                                                                                                                                                                                                                                                                                                                                                                                                                                                                                                                                                                                                                                                                                                                                                                                                                                                                                                                                                                                                                                                                                                                                                                                                                                                                                                                                                                                                                                                                                                                                                                                                                                                                                                                                                                                                                                                                                         |  |  |  |  |  |  |  |
|-------------------------------------------------------------------------------------------------------------------------------------------------------------------------------------------------------------------------------------------------------------------------------------------------------------------------------------------------------------------------------------------------------------------------------------------------------------------------------------------------------------------------------------------------------------------------------------------------------------------------------------------------------------------------------------------------------------------------------------------------------------------------------------------------------------------------------------------------------------------------------------------------------------------------------------------------------------------------------------------------------------------------------------------------------------------------------------------------------------------------------------------------------------------------------------------------------------------------------------------------------------------------------------------------------------------------------------------------------------------------------------------------------------------------------------------------------------------------------------------------------------------------------------------------------------------------------------------------------------------------------------------------------------------------------------------------------------------------------------------------------------------------------------------------------------------------------------------------------------------------------------------------------------------------------------------------------------------------------------------------------------------------------------------------------------------------------------------------------------------------------------------------------------------------------------------------------------------------------------------------------------------------------------------------------------------------------------------------------------------------------------------------------------------------------------------------------------------------------------------------------------------------------------------------------------------------------------------------------------------------------------------------------------------------------------------------------------------------------------------------------------------------------------------------------------------------------------------------------------------------------------------------------------------------------------------------------------------------------------------------------------------------------------------------------------------------------------------------------------------------------------------------------------------------------------------------------------------------------------------------------------------------------------------------------------------------------------------------------------------------------------------------------------------------------------------------------------------------------------------------------------------------------------------------------------------------------------------------------------------------------------------------------------------------------------------------------------------------------------------------------------------------------------------------------------------------------------------------------------------------------------------------------------------------------------------------------------------------------------------------------------------------------------------------------------------------------------------------------------------------------------------------------------------------------------------------------------------------------------------------------------------------------------------------------------------------------------------------------------------------------------------------------------------------------------------------------------------------------------------------------------------------------------------------------------------------------------------------------------------------------------------------------------------------------------------------------------------------------------------------------------------------------------------------------------------------------------------------------------------------------------------------------------------------------------------------------------------------------------------------------------------------------------------------------------------------------------------------------------------------------------------------------------------------------------------------------------------------------------------------------------------------------------------------------------------------------------------------------------------------------------------------------------------------------------------------------------------------------------------------------------------------------------------------------------------------------------------------------------------------------------------------------------------------------------------------------------------------------------------------------------------------------------------------------------------------------------------------------------------------------------------------------------------------------------------------------------------------------------------------------------------------------------------------------------------------------------------------------------------------------------------------------------------------------------------------------------------------------------------------------------------------------------------------------------------------------------------------------------------------------------------------------------------------------------------------------------------------------------------------------------------------------------------------------------------------------------------------------------------------------------------------------------------------------------------------------------------------------------------------------------------------------------------------------------------------------------------------------------------------------------------------------------------------------------------------------------------------------------------------------------------------------------------------------------------------------------------------------------------------------------------------------------------------------------------------------------------------------------------------------------------------------------------------------------------------------------------------------------------------------------------------------------------------------------------------------------------------------------------------------------------------------------------------------------------------------------------------------------------------------------------------------------------------------------------------------------------------------------------------------------------------------------------------------------------------------------------------------------------------------------------------------------------------------------------------------------------------------------------------------------------------------------------------------------------------------------------------------------------------------------------------------------------------------------------------------------------------|--|--|--|--|--|--|--|
| <p>1<br/>2<br/>3<br/>4<br/>5<br/>6<br/>7<br/>8<br/>9<br/>10<br/>11<br/>12<br/>13<br/>14<br/>15<br/>16<br/>17<br/>18<br/>19<br/>20<br/>21<br/>22<br/>23<br/>24<br/>25<br/>26<br/>27<br/>28<br/>29<br/>30<br/>31<br/>32<br/>33<br/>34<br/>35<br/>36<br/>37<br/>38<br/>39<br/>40<br/>41<br/>42<br/>43<br/>44<br/>45<br/>46<br/>47<br/>48<br/>49<br/>50<br/>51<br/>52<br/>53<br/>54<br/>55<br/>56<br/>57<br/>58<br/>59<br/>60<br/>61<br/>62<br/>63<br/>64<br/>65<br/>66<br/>67<br/>68<br/>69<br/>70<br/>71<br/>72<br/>73<br/>74<br/>75<br/>76<br/>77<br/>78<br/>79<br/>80<br/>81<br/>82<br/>83<br/>84<br/>85<br/>86<br/>87<br/>88<br/>89<br/>90<br/>91<br/>92<br/>93<br/>94<br/>95<br/>96<br/>97<br/>98<br/>99<br/>100<br/>101<br/>102<br/>103<br/>104<br/>105<br/>106<br/>107<br/>108<br/>109<br/>110<br/>111<br/>112<br/>113<br/>114<br/>115<br/>116<br/>117<br/>118<br/>119<br/>120<br/>121<br/>122<br/>123<br/>124<br/>125<br/>126<br/>127<br/>128<br/>129<br/>130<br/>131<br/>132<br/>133<br/>134<br/>135<br/>136<br/>137<br/>138<br/>139<br/>140<br/>141<br/>142<br/>143<br/>144<br/>145<br/>146<br/>147<br/>148<br/>149<br/>150<br/>151<br/>152<br/>153<br/>154<br/>155<br/>156<br/>157<br/>158<br/>159<br/>160<br/>161<br/>162<br/>163<br/>164<br/>165<br/>166<br/>167<br/>168<br/>169<br/>170<br/>171<br/>172<br/>173<br/>174<br/>175<br/>176<br/>177<br/>178<br/>179<br/>180<br/>181<br/>182<br/>183<br/>184<br/>185<br/>186<br/>187<br/>188<br/>189<br/>190<br/>191<br/>192<br/>193<br/>194<br/>195<br/>196<br/>197<br/>198<br/>199<br/>200<br/>201<br/>202<br/>203<br/>204<br/>205<br/>206<br/>207<br/>208<br/>209<br/>210<br/>211<br/>212<br/>213<br/>214<br/>215<br/>216<br/>217<br/>218<br/>219<br/>220<br/>221<br/>222<br/>223<br/>224<br/>225<br/>226<br/>227<br/>228<br/>229<br/>230<br/>231<br/>232<br/>233<br/>234<br/>235<br/>236<br/>237<br/>238<br/>239<br/>240<br/>241<br/>242<br/>243<br/>244<br/>245<br/>246<br/>247<br/>248<br/>249<br/>250<br/>251<br/>252<br/>253<br/>254<br/>255<br/>256<br/>257<br/>258<br/>259<br/>260<br/>261<br/>262<br/>263<br/>264<br/>265<br/>266<br/>267<br/>268<br/>269<br/>270<br/>271<br/>272<br/>273<br/>274<br/>275<br/>276<br/>277<br/>278<br/>279<br/>280<br/>281<br/>282<br/>283<br/>284<br/>285<br/>286<br/>287<br/>288<br/>289<br/>290<br/>291<br/>292<br/>293<br/>294<br/>295<br/>296<br/>297<br/>298<br/>299<br/>300<br/>301<br/>302<br/>303<br/>304<br/>305<br/>306<br/>307<br/>308<br/>309<br/>310<br/>311<br/>312<br/>313<br/>314<br/>315<br/>316<br/>317<br/>318<br/>319<br/>320<br/>321<br/>322<br/>323<br/>324<br/>325<br/>326<br/>327<br/>328<br/>329<br/>330<br/>331<br/>332<br/>333<br/>334<br/>335<br/>336<br/>337<br/>338<br/>339<br/>340<br/>341<br/>342<br/>343<br/>344<br/>345<br/>346<br/>347<br/>348<br/>349<br/>350<br/>351<br/>352<br/>353<br/>354<br/>355<br/>356<br/>357<br/>358<br/>359<br/>360<br/>361<br/>362<br/>363<br/>364<br/>365<br/>366<br/>367<br/>368<br/>369<br/>370<br/>371<br/>372<br/>373<br/>374<br/>375<br/>376<br/>377<br/>378<br/>379<br/>380<br/>381<br/>382<br/>383<br/>384<br/>385<br/>386<br/>387<br/>388<br/>389<br/>390<br/>391<br/>392<br/>393<br/>394<br/>395<br/>396<br/>397<br/>398<br/>399<br/>400<br/>401<br/>402<br/>403<br/>404<br/>405<br/>406<br/>407<br/>408<br/>409<br/>410<br/>411<br/>412<br/>413<br/>414<br/>415<br/>416<br/>417<br/>418<br/>419<br/>420<br/>421<br/>422<br/>423<br/>424<br/>425<br/>426<br/>427<br/>428<br/>429<br/>430<br/>431<br/>432<br/>433<br/>434<br/>435<br/>436<br/>437<br/>438<br/>439<br/>440<br/>441<br/>442<br/>443<br/>444<br/>445<br/>446<br/>447<br/>448<br/>449<br/>450<br/>451<br/>452<br/>453<br/>454<br/>455<br/>456<br/>457<br/>458<br/>459<br/>460<br/>461<br/>462<br/>463<br/>464<br/>465<br/>466<br/>467<br/>468<br/>469<br/>470<br/>471<br/>472<br/>473<br/>474<br/>475<br/>476<br/>477<br/>478<br/>479<br/>480<br/>481<br/>482<br/>483<br/>484<br/>485<br/>486<br/>487<br/>488<br/>489<br/>490<br/>491<br/>492<br/>493<br/>494<br/>495<br/>496<br/>497<br/>498<br/>499<br/>500<br/>501<br/>502<br/>503<br/>504<br/>505<br/>506<br/>507<br/>508<br/>509<br/>510<br/>511<br/>512<br/>513<br/>514<br/>515<br/>516<br/>517<br/>518<br/>519<br/>520<br/>521<br/>522<br/>523<br/>524<br/>525<br/>526<br/>527<br/>528<br/>529<br/>530<br/>531<br/>532<br/>533<br/>534<br/>535<br/>536<br/>537<br/>538<br/>539<br/>540<br/>541<br/>542<br/>543<br/>544<br/>545<br/>546<br/>547<br/>548<br/>549<br/>550<br/>551<br/>552<br/>553<br/>554<br/>555<br/>556<br/>557<br/>558<br/>559<br/>560<br/>561<br/>562<br/>563<br/>564<br/>565<br/>566<br/>567<br/>568<br/>569<br/>570<br/>571<br/>572<br/>573<br/>574<br/>575<br/>576<br/>577<br/>578<br/>579<br/>580<br/>581<br/>582<br/>583<br/>584<br/>585<br/>586<br/>587<br/>588<br/>589<br/>590<br/>591<br/>592<br/>593<br/>594<br/>595<br/>596<br/>597<br/>598<br/>599<br/>600<br/>601<br/>602<br/>603<br/>604<br/>605<br/>606<br/>607<br/>608<br/>609<br/>610<br/>611<br/>612<br/>613<br/>614<br/>615<br/>616<br/>617<br/>618<br/>619<br/>620<br/>621<br/>622<br/>623<br/>624<br/>625<br/>626<br/>627<br/>628<br/>629<br/>630<br/>631<br/>632<br/>633<br/>634<br/>635<br/>636<br/>637<br/>638<br/>639<br/>640<br/>641<br/>642<br/>643<br/>644<br/>645<br/>646<br/>647<br/>648<br/>649<br/>650<br/>651<br/>652<br/>653<br/>654<br/>655<br/>656<br/>657<br/>658<br/>659<br/>660<br/>661<br/>662<br/>663<br/>664<br/>665<br/>666<br/>667<br/>668<br/>669<br/>670<br/>671<br/>672<br/>673<br/>674<br/>675<br/>676<br/>677<br/>678<br/>679<br/>680<br/>681<br/>682<br/>683<br/>684<br/>685<br/>686<br/>687<br/>688<br/>689<br/>690<br/>691<br/>692<br/>693<br/>694<br/>695<br/>696<br/>697<br/>698<br/>699<br/>700<br/>701<br/>702<br/>703<br/>704<br/>705<br/>706<br/>707<br/>708<br/>709<br/>710<br/>711<br/>712<br/>713<br/>714<br/>715<br/>716<br/>717<br/>718<br/>719<br/>720<br/>721<br/>722<br/>723<br/>724<br/>725<br/>726<br/>727<br/>728<br/>729<br/>730<br/>731<br/>732<br/>733<br/>734<br/>735<br/>736<br/>737<br/>738<br/>739<br/>740<br/>741<br/>742<br/>743<br/>744<br/>745<br/>746<br/>747<br/>748<br/>749<br/>750<br/>751<br/>752<br/>753<br/>754<br/>755<br/>756<br/>757<br/>758<br/>759<br/>760<br/>761<br/>762<br/>763<br/>764<br/>765<br/>766<br/>767<br/>768<br/>769<br/>770<br/>771<br/>772<br/>773<br/>774<br/>775<br/>776<br/>777<br/>778<br/>779<br/>780<br/>781<br/>782<br/>783<br/>784<br/>785<br/>786<br/>787<br/>788<br/>789<br/>790<br/>791<br/>792<br/>793<br/>794<br/>795<br/>796<br/>797<br/>798<br/>799<br/>800<br/>801<br/>802<br/>803<br/>804<br/>805<br/>806<br/>807<br/>808<br/>809<br/>810<br/>811<br/>812<br/>813<br/>814<br/>815<br/>816<br/>817<br/>818<br/>819<br/>820<br/>821<br/>822<br/>823<br/>824<br/>825<br/>826<br/>827<br/>828<br/>829<br/>830<br/>831<br/>832<br/>833<br/>834<br/>835<br/>836<br/>837<br/>838<br/>839<br/>840<br/>841<br/>842<br/>843<br/>844<br/>845<br/>846<br/>847<br/>848<br/>849<br/>850<br/>851<br/>852<br/>853<br/>854<br/>855<br/>856<br/>857<br/>858<br/>859<br/>860<br/>861<br/>862<br/>863<br/>864<br/>865<br/>866<br/>867<br/>868<br/>869<br/>870<br/>871<br/>872<br/>873<br/>874<br/>875<br/>876<br/>877<br/>878<br/>879<br/>880<br/>881<br/>882<br/>883<br/>884<br/>885<br/>886<br/>887<br/>888<br/>889<br/>890<br/>891<br/>892<br/>893<br/>894<br/>895<br/>896<br/>897<br/>898<br/>899<br/>900<br/>901<br/>902<br/>903<br/>904<br/>905<br/>906<br/>907<br/>908<br/>909<br/>910<br/>911<br/>912<br/>913<br/>914<br/>915<br/>916<br/>917<br/>918<br/>919<br/>920<br/>921<br/>922<br/>923<br/>924<br/>925<br/>926<br/>927<br/>928<br/>929<br/>930<br/>931<br/>932<br/>933<br/>934<br/>935<br/>936<br/>937<br/>938<br/>939<br/>940<br/>941<br/>942<br/>943<br/>944<br/>945<br/>946<br/>947<br/>948<br/>949<br/>950<br/>951<br/>952<br/>953<br/>954<br/>955<br/>956<br/>957<br/>958<br/>959<br/>960<br/>961<br/>962<br/>963<br/>964<br/>965<br/>966<br/>967<br/>968<br/>969<br/>970<br/>971<br/>972<br/>973<br/>974<br/>975<br/>976<br/>977<br/>978<br/>979<br/>980<br/>981<br/>982<br/>983<br/>984<br/>985<br/>986<br/>987<br/>988<br/>989<br/>990<br/>991<br/>992<br/>993<br/>994<br/>995<br/>996<br/>997<br/>998<br/>999<br/>1000</p> |  |  |  |  |  |  |  |
|-------------------------------------------------------------------------------------------------------------------------------------------------------------------------------------------------------------------------------------------------------------------------------------------------------------------------------------------------------------------------------------------------------------------------------------------------------------------------------------------------------------------------------------------------------------------------------------------------------------------------------------------------------------------------------------------------------------------------------------------------------------------------------------------------------------------------------------------------------------------------------------------------------------------------------------------------------------------------------------------------------------------------------------------------------------------------------------------------------------------------------------------------------------------------------------------------------------------------------------------------------------------------------------------------------------------------------------------------------------------------------------------------------------------------------------------------------------------------------------------------------------------------------------------------------------------------------------------------------------------------------------------------------------------------------------------------------------------------------------------------------------------------------------------------------------------------------------------------------------------------------------------------------------------------------------------------------------------------------------------------------------------------------------------------------------------------------------------------------------------------------------------------------------------------------------------------------------------------------------------------------------------------------------------------------------------------------------------------------------------------------------------------------------------------------------------------------------------------------------------------------------------------------------------------------------------------------------------------------------------------------------------------------------------------------------------------------------------------------------------------------------------------------------------------------------------------------------------------------------------------------------------------------------------------------------------------------------------------------------------------------------------------------------------------------------------------------------------------------------------------------------------------------------------------------------------------------------------------------------------------------------------------------------------------------------------------------------------------------------------------------------------------------------------------------------------------------------------------------------------------------------------------------------------------------------------------------------------------------------------------------------------------------------------------------------------------------------------------------------------------------------------------------------------------------------------------------------------------------------------------------------------------------------------------------------------------------------------------------------------------------------------------------------------------------------------------------------------------------------------------------------------------------------------------------------------------------------------------------------------------------------------------------------------------------------------------------------------------------------------------------------------------------------------------------------------------------------------------------------------------------------------------------------------------------------------------------------------------------------------------------------------------------------------------------------------------------------------------------------------------------------------------------------------------------------------------------------------------------------------------------------------------------------------------------------------------------------------------------------------------------------------------------------------------------------------------------------------------------------------------------------------------------------------------------------------------------------------------------------------------------------------------------------------------------------------------------------------------------------------------------------------------------------------------------------------------------------------------------------------------------------------------------------------------------------------------------------------------------------------------------------------------------------------------------------------------------------------------------------------------------------------------------------------------------------------------------------------------------------------------------------------------------------------------------------------------------------------------------------------------------------------------------------------------------------------------------------------------------------------------------------------------------------------------------------------------------------------------------------------------------------------------------------------------------------------------------------------------------------------------------------------------------------------------------------------------------------------------------------------------------------------------------------------------------------------------------------------------------------------------------------------------------------------------------------------------------------------------------------------------------------------------------------------------------------------------------------------------------------------------------------------------------------------------------------------------------------------------------------------------------------------------------------------------------------------------------------------------------------------------------------------------------------------------------------------------------------------------------------------------------------------------------------------------------------------------------------------------------------------------------------------------------------------------------------------------------------------------------------------------------------------------------------------------------------------------------------------------------------------------------------------------------------------------------------------------------------------------------------------------------------------------------------------------------------------------------------------------------------------------------------------------------------------------------------------------------------------------------------------------------------------------------------------------------------------------------------------------------------------------------------------------------------------------------------------------------------------------|--|--|--|--|--|--|--|

|                                                                                                                                                                                                                                                                                                                                                                                                                                                                                                                                                                                                                                                                                                                                                                                                                                                                                                                                                                                                                                                                                                                                                                                                                                                                                                                                                                                                                                                                                                                                                                                                                                                                                                                                                                                                                                                                                                                                                                                                                                                                                                                                                                                                                                                                                                                                                                                                                                                                                                                                                                                                                                                                                                                                                                                                                                                                                                                                                                                                                                                                                                                                                                                                                                                                                                                                                                                                                                                                                                                                                                                                                                                                                                                                                                                                                                                                                                                                                                                                                                                                                                                                                                                                                                                                                                                                                                                                                                                                                                                                                                                                                                                                                                                                                                                                                                                                                                                                                                                                                                                                                                                                                                                                                                                                                                                                                                                                                                                                                                                                                                                                                                                                                                                                                                                                                                                                                                                                                                                                                                                                                                                                                                                                                                                                                                                                                                                                                                                                                                                                                                                                                                                                                                                                                                                                                                                                                                                                                                                                                                                                                                                                                                                                                                                                                                                                                                                                                                                                                                                                                                                                                                                                                                                                                                                                                                                                                                                                                                                                                                                                                                                                                                                                                         |  |  |  |  |  |  |  |
|-------------------------------------------------------------------------------------------------------------------------------------------------------------------------------------------------------------------------------------------------------------------------------------------------------------------------------------------------------------------------------------------------------------------------------------------------------------------------------------------------------------------------------------------------------------------------------------------------------------------------------------------------------------------------------------------------------------------------------------------------------------------------------------------------------------------------------------------------------------------------------------------------------------------------------------------------------------------------------------------------------------------------------------------------------------------------------------------------------------------------------------------------------------------------------------------------------------------------------------------------------------------------------------------------------------------------------------------------------------------------------------------------------------------------------------------------------------------------------------------------------------------------------------------------------------------------------------------------------------------------------------------------------------------------------------------------------------------------------------------------------------------------------------------------------------------------------------------------------------------------------------------------------------------------------------------------------------------------------------------------------------------------------------------------------------------------------------------------------------------------------------------------------------------------------------------------------------------------------------------------------------------------------------------------------------------------------------------------------------------------------------------------------------------------------------------------------------------------------------------------------------------------------------------------------------------------------------------------------------------------------------------------------------------------------------------------------------------------------------------------------------------------------------------------------------------------------------------------------------------------------------------------------------------------------------------------------------------------------------------------------------------------------------------------------------------------------------------------------------------------------------------------------------------------------------------------------------------------------------------------------------------------------------------------------------------------------------------------------------------------------------------------------------------------------------------------------------------------------------------------------------------------------------------------------------------------------------------------------------------------------------------------------------------------------------------------------------------------------------------------------------------------------------------------------------------------------------------------------------------------------------------------------------------------------------------------------------------------------------------------------------------------------------------------------------------------------------------------------------------------------------------------------------------------------------------------------------------------------------------------------------------------------------------------------------------------------------------------------------------------------------------------------------------------------------------------------------------------------------------------------------------------------------------------------------------------------------------------------------------------------------------------------------------------------------------------------------------------------------------------------------------------------------------------------------------------------------------------------------------------------------------------------------------------------------------------------------------------------------------------------------------------------------------------------------------------------------------------------------------------------------------------------------------------------------------------------------------------------------------------------------------------------------------------------------------------------------------------------------------------------------------------------------------------------------------------------------------------------------------------------------------------------------------------------------------------------------------------------------------------------------------------------------------------------------------------------------------------------------------------------------------------------------------------------------------------------------------------------------------------------------------------------------------------------------------------------------------------------------------------------------------------------------------------------------------------------------------------------------------------------------------------------------------------------------------------------------------------------------------------------------------------------------------------------------------------------------------------------------------------------------------------------------------------------------------------------------------------------------------------------------------------------------------------------------------------------------------------------------------------------------------------------------------------------------------------------------------------------------------------------------------------------------------------------------------------------------------------------------------------------------------------------------------------------------------------------------------------------------------------------------------------------------------------------------------------------------------------------------------------------------------------------------------------------------------------------------------------------------------------------------------------------------------------------------------------------------------------------------------------------------------------------------------------------------------------------------------------------------------------------------------------------------------------------------------------------------------------------------------------------------------------------------------------------------------------------------------------------------------------------------------------------------------------------------------------------------------------------------------------------------------------------------------------------------------------------------------------------------------------------------------------------------------------------------------------------------------------------------------------------------------------------------------------------------------------------------------------|--|--|--|--|--|--|--|
| <p>1<br/>2<br/>3<br/>4<br/>5<br/>6<br/>7<br/>8<br/>9<br/>10<br/>11<br/>12<br/>13<br/>14<br/>15<br/>16<br/>17<br/>18<br/>19<br/>20<br/>21<br/>22<br/>23<br/>24<br/>25<br/>26<br/>27<br/>28<br/>29<br/>30<br/>31<br/>32<br/>33<br/>34<br/>35<br/>36<br/>37<br/>38<br/>39<br/>40<br/>41<br/>42<br/>43<br/>44<br/>45<br/>46<br/>47<br/>48<br/>49<br/>50<br/>51<br/>52<br/>53<br/>54<br/>55<br/>56<br/>57<br/>58<br/>59<br/>60<br/>61<br/>62<br/>63<br/>64<br/>65<br/>66<br/>67<br/>68<br/>69<br/>70<br/>71<br/>72<br/>73<br/>74<br/>75<br/>76<br/>77<br/>78<br/>79<br/>80<br/>81<br/>82<br/>83<br/>84<br/>85<br/>86<br/>87<br/>88<br/>89<br/>90<br/>91<br/>92<br/>93<br/>94<br/>95<br/>96<br/>97<br/>98<br/>99<br/>100<br/>101<br/>102<br/>103<br/>104<br/>105<br/>106<br/>107<br/>108<br/>109<br/>110<br/>111<br/>112<br/>113<br/>114<br/>115<br/>116<br/>117<br/>118<br/>119<br/>120<br/>121<br/>122<br/>123<br/>124<br/>125<br/>126<br/>127<br/>128<br/>129<br/>130<br/>131<br/>132<br/>133<br/>134<br/>135<br/>136<br/>137<br/>138<br/>139<br/>140<br/>141<br/>142<br/>143<br/>144<br/>145<br/>146<br/>147<br/>148<br/>149<br/>150<br/>151<br/>152<br/>153<br/>154<br/>155<br/>156<br/>157<br/>158<br/>159<br/>160<br/>161<br/>162<br/>163<br/>164<br/>165<br/>166<br/>167<br/>168<br/>169<br/>170<br/>171<br/>172<br/>173<br/>174<br/>175<br/>176<br/>177<br/>178<br/>179<br/>180<br/>181<br/>182<br/>183<br/>184<br/>185<br/>186<br/>187<br/>188<br/>189<br/>190<br/>191<br/>192<br/>193<br/>194<br/>195<br/>196<br/>197<br/>198<br/>199<br/>200<br/>201<br/>202<br/>203<br/>204<br/>205<br/>206<br/>207<br/>208<br/>209<br/>210<br/>211<br/>212<br/>213<br/>214<br/>215<br/>216<br/>217<br/>218<br/>219<br/>220<br/>221<br/>222<br/>223<br/>224<br/>225<br/>226<br/>227<br/>228<br/>229<br/>230<br/>231<br/>232<br/>233<br/>234<br/>235<br/>236<br/>237<br/>238<br/>239<br/>240<br/>241<br/>242<br/>243<br/>244<br/>245<br/>246<br/>247<br/>248<br/>249<br/>250<br/>251<br/>252<br/>253<br/>254<br/>255<br/>256<br/>257<br/>258<br/>259<br/>260<br/>261<br/>262<br/>263<br/>264<br/>265<br/>266<br/>267<br/>268<br/>269<br/>270<br/>271<br/>272<br/>273<br/>274<br/>275<br/>276<br/>277<br/>278<br/>279<br/>280<br/>281<br/>282<br/>283<br/>284<br/>285<br/>286<br/>287<br/>288<br/>289<br/>290<br/>291<br/>292<br/>293<br/>294<br/>295<br/>296<br/>297<br/>298<br/>299<br/>300<br/>301<br/>302<br/>303<br/>304<br/>305<br/>306<br/>307<br/>308<br/>309<br/>310<br/>311<br/>312<br/>313<br/>314<br/>315<br/>316<br/>317<br/>318<br/>319<br/>320<br/>321<br/>322<br/>323<br/>324<br/>325<br/>326<br/>327<br/>328<br/>329<br/>330<br/>331<br/>332<br/>333<br/>334<br/>335<br/>336<br/>337<br/>338<br/>339<br/>340<br/>341<br/>342<br/>343<br/>344<br/>345<br/>346<br/>347<br/>348<br/>349<br/>350<br/>351<br/>352<br/>353<br/>354<br/>355<br/>356<br/>357<br/>358<br/>359<br/>360<br/>361<br/>362<br/>363<br/>364<br/>365<br/>366<br/>367<br/>368<br/>369<br/>370<br/>371<br/>372<br/>373<br/>374<br/>375<br/>376<br/>377<br/>378<br/>379<br/>380<br/>381<br/>382<br/>383<br/>384<br/>385<br/>386<br/>387<br/>388<br/>389<br/>390<br/>391<br/>392<br/>393<br/>394<br/>395<br/>396<br/>397<br/>398<br/>399<br/>400<br/>401<br/>402<br/>403<br/>404<br/>405<br/>406<br/>407<br/>408<br/>409<br/>410<br/>411<br/>412<br/>413<br/>414<br/>415<br/>416<br/>417<br/>418<br/>419<br/>420<br/>421<br/>422<br/>423<br/>424<br/>425<br/>426<br/>427<br/>428<br/>429<br/>430<br/>431<br/>432<br/>433<br/>434<br/>435<br/>436<br/>437<br/>438<br/>439<br/>440<br/>441<br/>442<br/>443<br/>444<br/>445<br/>446<br/>447<br/>448<br/>449<br/>450<br/>451<br/>452<br/>453<br/>454<br/>455<br/>456<br/>457<br/>458<br/>459<br/>460<br/>461<br/>462<br/>463<br/>464<br/>465<br/>466<br/>467<br/>468<br/>469<br/>470<br/>471<br/>472<br/>473<br/>474<br/>475<br/>476<br/>477<br/>478<br/>479<br/>480<br/>481<br/>482<br/>483<br/>484<br/>485<br/>486<br/>487<br/>488<br/>489<br/>490<br/>491<br/>492<br/>493<br/>494<br/>495<br/>496<br/>497<br/>498<br/>499<br/>500<br/>501<br/>502<br/>503<br/>504<br/>505<br/>506<br/>507<br/>508<br/>509<br/>510<br/>511<br/>512<br/>513<br/>514<br/>515<br/>516<br/>517<br/>518<br/>519<br/>520<br/>521<br/>522<br/>523<br/>524<br/>525<br/>526<br/>527<br/>528<br/>529<br/>530<br/>531<br/>532<br/>533<br/>534<br/>535<br/>536<br/>537<br/>538<br/>539<br/>540<br/>541<br/>542<br/>543<br/>544<br/>545<br/>546<br/>547<br/>548<br/>549<br/>550<br/>551<br/>552<br/>553<br/>554<br/>555<br/>556<br/>557<br/>558<br/>559<br/>560<br/>561<br/>562<br/>563<br/>564<br/>565<br/>566<br/>567<br/>568<br/>569<br/>570<br/>571<br/>572<br/>573<br/>574<br/>575<br/>576<br/>577<br/>578<br/>579<br/>580<br/>581<br/>582<br/>583<br/>584<br/>585<br/>586<br/>587<br/>588<br/>589<br/>590<br/>591<br/>592<br/>593<br/>594<br/>595<br/>596<br/>597<br/>598<br/>599<br/>600<br/>601<br/>602<br/>603<br/>604<br/>605<br/>606<br/>607<br/>608<br/>609<br/>610<br/>611<br/>612<br/>613<br/>614<br/>615<br/>616<br/>617<br/>618<br/>619<br/>620<br/>621<br/>622<br/>623<br/>624<br/>625<br/>626<br/>627<br/>628<br/>629<br/>630<br/>631<br/>632<br/>633<br/>634<br/>635<br/>636<br/>637<br/>638<br/>639<br/>640<br/>641<br/>642<br/>643<br/>644<br/>645<br/>646<br/>647<br/>648<br/>649<br/>650<br/>651<br/>652<br/>653<br/>654<br/>655<br/>656<br/>657<br/>658<br/>659<br/>660<br/>661<br/>662<br/>663<br/>664<br/>665<br/>666<br/>667<br/>668<br/>669<br/>670<br/>671<br/>672<br/>673<br/>674<br/>675<br/>676<br/>677<br/>678<br/>679<br/>680<br/>681<br/>682<br/>683<br/>684<br/>685<br/>686<br/>687<br/>688<br/>689<br/>690<br/>691<br/>692<br/>693<br/>694<br/>695<br/>696<br/>697<br/>698<br/>699<br/>700<br/>701<br/>702<br/>703<br/>704<br/>705<br/>706<br/>707<br/>708<br/>709<br/>710<br/>711<br/>712<br/>713<br/>714<br/>715<br/>716<br/>717<br/>718<br/>719<br/>720<br/>721<br/>722<br/>723<br/>724<br/>725<br/>726<br/>727<br/>728<br/>729<br/>730<br/>731<br/>732<br/>733<br/>734<br/>735<br/>736<br/>737<br/>738<br/>739<br/>740<br/>741<br/>742<br/>743<br/>744<br/>745<br/>746<br/>747<br/>748<br/>749<br/>750<br/>751<br/>752<br/>753<br/>754<br/>755<br/>756<br/>757<br/>758<br/>759<br/>760<br/>761<br/>762<br/>763<br/>764<br/>765<br/>766<br/>767<br/>768<br/>769<br/>770<br/>771<br/>772<br/>773<br/>774<br/>775<br/>776<br/>777<br/>778<br/>779<br/>780<br/>781<br/>782<br/>783<br/>784<br/>785<br/>786<br/>787<br/>788<br/>789<br/>790<br/>791<br/>792<br/>793<br/>794<br/>795<br/>796<br/>797<br/>798<br/>799<br/>800<br/>801<br/>802<br/>803<br/>804<br/>805<br/>806<br/>807<br/>808<br/>809<br/>810<br/>811<br/>812<br/>813<br/>814<br/>815<br/>816<br/>817<br/>818<br/>819<br/>820<br/>821<br/>822<br/>823<br/>824<br/>825<br/>826<br/>827<br/>828<br/>829<br/>830<br/>831<br/>832<br/>833<br/>834<br/>835<br/>836<br/>837<br/>838<br/>839<br/>840<br/>841<br/>842<br/>843<br/>844<br/>845<br/>846<br/>847<br/>848<br/>849<br/>850<br/>851<br/>852<br/>853<br/>854<br/>855<br/>856<br/>857<br/>858<br/>859<br/>860<br/>861<br/>862<br/>863<br/>864<br/>865<br/>866<br/>867<br/>868<br/>869<br/>870<br/>871<br/>872<br/>873<br/>874<br/>875<br/>876<br/>877<br/>878<br/>879<br/>880<br/>881<br/>882<br/>883<br/>884<br/>885<br/>886<br/>887<br/>888<br/>889<br/>890<br/>891<br/>892<br/>893<br/>894<br/>895<br/>896<br/>897<br/>898<br/>899<br/>900<br/>901<br/>902<br/>903<br/>904<br/>905<br/>906<br/>907<br/>908<br/>909<br/>910<br/>911<br/>912<br/>913<br/>914<br/>915<br/>916<br/>917<br/>918<br/>919<br/>920<br/>921<br/>922<br/>923<br/>924<br/>925<br/>926<br/>927<br/>928<br/>929<br/>930<br/>931<br/>932<br/>933<br/>934<br/>935<br/>936<br/>937<br/>938<br/>939<br/>940<br/>941<br/>942<br/>943<br/>944<br/>945<br/>946<br/>947<br/>948<br/>949<br/>950<br/>951<br/>952<br/>953<br/>954<br/>955<br/>956<br/>957<br/>958<br/>959<br/>960<br/>961<br/>962<br/>963<br/>964<br/>965<br/>966<br/>967<br/>968<br/>969<br/>970<br/>971<br/>972<br/>973<br/>974<br/>975<br/>976<br/>977<br/>978<br/>979<br/>980<br/>981<br/>982<br/>983<br/>984<br/>985<br/>986<br/>987<br/>988<br/>989<br/>990<br/>991<br/>992<br/>993<br/>994<br/>995<br/>996<br/>997<br/>998<br/>999<br/>1000</p> |  |  |  |  |  |  |  |
|-------------------------------------------------------------------------------------------------------------------------------------------------------------------------------------------------------------------------------------------------------------------------------------------------------------------------------------------------------------------------------------------------------------------------------------------------------------------------------------------------------------------------------------------------------------------------------------------------------------------------------------------------------------------------------------------------------------------------------------------------------------------------------------------------------------------------------------------------------------------------------------------------------------------------------------------------------------------------------------------------------------------------------------------------------------------------------------------------------------------------------------------------------------------------------------------------------------------------------------------------------------------------------------------------------------------------------------------------------------------------------------------------------------------------------------------------------------------------------------------------------------------------------------------------------------------------------------------------------------------------------------------------------------------------------------------------------------------------------------------------------------------------------------------------------------------------------------------------------------------------------------------------------------------------------------------------------------------------------------------------------------------------------------------------------------------------------------------------------------------------------------------------------------------------------------------------------------------------------------------------------------------------------------------------------------------------------------------------------------------------------------------------------------------------------------------------------------------------------------------------------------------------------------------------------------------------------------------------------------------------------------------------------------------------------------------------------------------------------------------------------------------------------------------------------------------------------------------------------------------------------------------------------------------------------------------------------------------------------------------------------------------------------------------------------------------------------------------------------------------------------------------------------------------------------------------------------------------------------------------------------------------------------------------------------------------------------------------------------------------------------------------------------------------------------------------------------------------------------------------------------------------------------------------------------------------------------------------------------------------------------------------------------------------------------------------------------------------------------------------------------------------------------------------------------------------------------------------------------------------------------------------------------------------------------------------------------------------------------------------------------------------------------------------------------------------------------------------------------------------------------------------------------------------------------------------------------------------------------------------------------------------------------------------------------------------------------------------------------------------------------------------------------------------------------------------------------------------------------------------------------------------------------------------------------------------------------------------------------------------------------------------------------------------------------------------------------------------------------------------------------------------------------------------------------------------------------------------------------------------------------------------------------------------------------------------------------------------------------------------------------------------------------------------------------------------------------------------------------------------------------------------------------------------------------------------------------------------------------------------------------------------------------------------------------------------------------------------------------------------------------------------------------------------------------------------------------------------------------------------------------------------------------------------------------------------------------------------------------------------------------------------------------------------------------------------------------------------------------------------------------------------------------------------------------------------------------------------------------------------------------------------------------------------------------------------------------------------------------------------------------------------------------------------------------------------------------------------------------------------------------------------------------------------------------------------------------------------------------------------------------------------------------------------------------------------------------------------------------------------------------------------------------------------------------------------------------------------------------------------------------------------------------------------------------------------------------------------------------------------------------------------------------------------------------------------------------------------------------------------------------------------------------------------------------------------------------------------------------------------------------------------------------------------------------------------------------------------------------------------------------------------------------------------------------------------------------------------------------------------------------------------------------------------------------------------------------------------------------------------------------------------------------------------------------------------------------------------------------------------------------------------------------------------------------------------------------------------------------------------------------------------------------------------------------------------------------------------------------------------------------------------------------------------------------------------------------------------------------------------------------------------------------------------------------------------------------------------------------------------------------------------------------------------------------------------------------------------------------------------------------------------------------------------------------------------------------------------------------------------------------------------------------------------------------------------------------------------------|--|--|--|--|--|--|--|

|                                                                                                                                                                                                                                                                                                                                                                                                                                                                                                                                                                                                                                                                                                                                                                                                                                                                                                                                                                                                                                                                                                                                                                                                                                                                                                                                                                                                                                                                                                                                                                                                                                                                                                                                                                                                                                                                                                                                                                                                                                                                                                                                                                                                                                                                                                                                                                                                                                                                                                                                                                                                                                                                                                                                                                                                                                                                                                                                                                                                                                                                                                                                                                                                                                                                                                                                                                                                                                                                                                                                                                                                                                                                                                                                                                                                                                                                                                                                                                                                                                                                                                                                                                                                                                                                                                                                                                                                                                                                                                                                                                                                                                                                                                                                                                                                                                                                                                                                                                                                                                                                                                                                                                                                                                                                                                                                                                                                                                                                                                                                                                                                                                                                                                                                                                                                                                                                                                                                                                                                                                                                                                                                                                                                                                                                                                                                                                                                                                                                                                                                                                                                                                                                                                                                                                                                                                                                                                                                                                                                                                                                                                                                                                                                                                                                                                                                                                                                                                                                                                     |  |  |  |  |  |  |  |
|-----------------------------------------------------------------------------------------------------------------------------------------------------------------------------------------------------------------------------------------------------------------------------------------------------------------------------------------------------------------------------------------------------------------------------------------------------------------------------------------------------------------------------------------------------------------------------------------------------------------------------------------------------------------------------------------------------------------------------------------------------------------------------------------------------------------------------------------------------------------------------------------------------------------------------------------------------------------------------------------------------------------------------------------------------------------------------------------------------------------------------------------------------------------------------------------------------------------------------------------------------------------------------------------------------------------------------------------------------------------------------------------------------------------------------------------------------------------------------------------------------------------------------------------------------------------------------------------------------------------------------------------------------------------------------------------------------------------------------------------------------------------------------------------------------------------------------------------------------------------------------------------------------------------------------------------------------------------------------------------------------------------------------------------------------------------------------------------------------------------------------------------------------------------------------------------------------------------------------------------------------------------------------------------------------------------------------------------------------------------------------------------------------------------------------------------------------------------------------------------------------------------------------------------------------------------------------------------------------------------------------------------------------------------------------------------------------------------------------------------------------------------------------------------------------------------------------------------------------------------------------------------------------------------------------------------------------------------------------------------------------------------------------------------------------------------------------------------------------------------------------------------------------------------------------------------------------------------------------------------------------------------------------------------------------------------------------------------------------------------------------------------------------------------------------------------------------------------------------------------------------------------------------------------------------------------------------------------------------------------------------------------------------------------------------------------------------------------------------------------------------------------------------------------------------------------------------------------------------------------------------------------------------------------------------------------------------------------------------------------------------------------------------------------------------------------------------------------------------------------------------------------------------------------------------------------------------------------------------------------------------------------------------------------------------------------------------------------------------------------------------------------------------------------------------------------------------------------------------------------------------------------------------------------------------------------------------------------------------------------------------------------------------------------------------------------------------------------------------------------------------------------------------------------------------------------------------------------------------------------------------------------------------------------------------------------------------------------------------------------------------------------------------------------------------------------------------------------------------------------------------------------------------------------------------------------------------------------------------------------------------------------------------------------------------------------------------------------------------------------------------------------------------------------------------------------------------------------------------------------------------------------------------------------------------------------------------------------------------------------------------------------------------------------------------------------------------------------------------------------------------------------------------------------------------------------------------------------------------------------------------------------------------------------------------------------------------------------------------------------------------------------------------------------------------------------------------------------------------------------------------------------------------------------------------------------------------------------------------------------------------------------------------------------------------------------------------------------------------------------------------------------------------------------------------------------------------------------------------------------------------------------------------------------------------------------------------------------------------------------------------------------------------------------------------------------------------------------------------------------------------------------------------------------------------------------------------------------------------------------------------------------------------------------------------------------------------------------------------------------------------------------------------------------------------------------------------------------------------------------------------------------------------------------------------------------------------------------------------------------------------------------------------------------------------------------------------------------------------------------------------------------------------------------------------------------------------------------------------------------------------|--|--|--|--|--|--|--|
| <p>101<br/>102<br/>103<br/>104<br/>105<br/>106<br/>107<br/>108<br/>109<br/>110<br/>111<br/>112<br/>113<br/>114<br/>115<br/>116<br/>117<br/>118<br/>119<br/>120<br/>121<br/>122<br/>123<br/>124<br/>125<br/>126<br/>127<br/>128<br/>129<br/>130<br/>131<br/>132<br/>133<br/>134<br/>135<br/>136<br/>137<br/>138<br/>139<br/>140<br/>141<br/>142<br/>143<br/>144<br/>145<br/>146<br/>147<br/>148<br/>149<br/>150<br/>151<br/>152<br/>153<br/>154<br/>155<br/>156<br/>157<br/>158<br/>159<br/>160<br/>161<br/>162<br/>163<br/>164<br/>165<br/>166<br/>167<br/>168<br/>169<br/>170<br/>171<br/>172<br/>173<br/>174<br/>175<br/>176<br/>177<br/>178<br/>179<br/>180<br/>181<br/>182<br/>183<br/>184<br/>185<br/>186<br/>187<br/>188<br/>189<br/>190<br/>191<br/>192<br/>193<br/>194<br/>195<br/>196<br/>197<br/>198<br/>199<br/>200<br/>201<br/>202<br/>203<br/>204<br/>205<br/>206<br/>207<br/>208<br/>209<br/>210<br/>211<br/>212<br/>213<br/>214<br/>215<br/>216<br/>217<br/>218<br/>219<br/>220<br/>221<br/>222<br/>223<br/>224<br/>225<br/>226<br/>227<br/>228<br/>229<br/>230<br/>231<br/>232<br/>233<br/>234<br/>235<br/>236<br/>237<br/>238<br/>239<br/>240<br/>241<br/>242<br/>243<br/>244<br/>245<br/>246<br/>247<br/>248<br/>249<br/>250<br/>251<br/>252<br/>253<br/>254<br/>255<br/>256<br/>257<br/>258<br/>259<br/>260<br/>261<br/>262<br/>263<br/>264<br/>265<br/>266<br/>267<br/>268<br/>269<br/>270<br/>271<br/>272<br/>273<br/>274<br/>275<br/>276<br/>277<br/>278<br/>279<br/>280<br/>281<br/>282<br/>283<br/>284<br/>285<br/>286<br/>287<br/>288<br/>289<br/>290<br/>291<br/>292<br/>293<br/>294<br/>295<br/>296<br/>297<br/>298<br/>299<br/>300<br/>301<br/>302<br/>303<br/>304<br/>305<br/>306<br/>307<br/>308<br/>309<br/>310<br/>311<br/>312<br/>313<br/>314<br/>315<br/>316<br/>317<br/>318<br/>319<br/>320<br/>321<br/>322<br/>323<br/>324<br/>325<br/>326<br/>327<br/>328<br/>329<br/>330<br/>331<br/>332<br/>333<br/>334<br/>335<br/>336<br/>337<br/>338<br/>339<br/>340<br/>341<br/>342<br/>343<br/>344<br/>345<br/>346<br/>347<br/>348<br/>349<br/>350<br/>351<br/>352<br/>353<br/>354<br/>355<br/>356<br/>357<br/>358<br/>359<br/>360<br/>361<br/>362<br/>363<br/>364<br/>365<br/>366<br/>367<br/>368<br/>369<br/>370<br/>371<br/>372<br/>373<br/>374<br/>375<br/>376<br/>377<br/>378<br/>379<br/>380<br/>381<br/>382<br/>383<br/>384<br/>385<br/>386<br/>387<br/>388<br/>389<br/>390<br/>391<br/>392<br/>393<br/>394<br/>395<br/>396<br/>397<br/>398<br/>399<br/>400<br/>401<br/>402<br/>403<br/>404<br/>405<br/>406<br/>407<br/>408<br/>409<br/>410<br/>411<br/>412<br/>413<br/>414<br/>415<br/>416<br/>417<br/>418<br/>419<br/>420<br/>421<br/>422<br/>423<br/>424<br/>425<br/>426<br/>427<br/>428<br/>429<br/>430<br/>431<br/>432<br/>433<br/>434<br/>435<br/>436<br/>437<br/>438<br/>439<br/>440<br/>441<br/>442<br/>443<br/>444<br/>445<br/>446<br/>447<br/>448<br/>449<br/>450<br/>451<br/>452<br/>453<br/>454<br/>455<br/>456<br/>457<br/>458<br/>459<br/>460<br/>461<br/>462<br/>463<br/>464<br/>465<br/>466<br/>467<br/>468<br/>469<br/>470<br/>471<br/>472<br/>473<br/>474<br/>475<br/>476<br/>477<br/>478<br/>479<br/>480<br/>481<br/>482<br/>483<br/>484<br/>485<br/>486<br/>487<br/>488<br/>489<br/>490<br/>491<br/>492<br/>493<br/>494<br/>495<br/>496<br/>497<br/>498<br/>499<br/>500<br/>501<br/>502<br/>503<br/>504<br/>505<br/>506<br/>507<br/>508<br/>509<br/>510<br/>511<br/>512<br/>513<br/>514<br/>515<br/>516<br/>517<br/>518<br/>519<br/>520<br/>521<br/>522<br/>523<br/>524<br/>525<br/>526<br/>527<br/>528<br/>529<br/>530<br/>531<br/>532<br/>533<br/>534<br/>535<br/>536<br/>537<br/>538<br/>539<br/>540<br/>541<br/>542<br/>543<br/>544<br/>545<br/>546<br/>547<br/>548<br/>549<br/>550<br/>551<br/>552<br/>553<br/>554<br/>555<br/>556<br/>557<br/>558<br/>559<br/>560<br/>561<br/>562<br/>563<br/>564<br/>565<br/>566<br/>567<br/>568<br/>569<br/>570<br/>571<br/>572<br/>573<br/>574<br/>575<br/>576<br/>577<br/>578<br/>579<br/>580<br/>581<br/>582<br/>583<br/>584<br/>585<br/>586<br/>587<br/>588<br/>589<br/>590<br/>591<br/>592<br/>593<br/>594<br/>595<br/>596<br/>597<br/>598<br/>599<br/>600<br/>601<br/>602<br/>603<br/>604<br/>605<br/>606<br/>607<br/>608<br/>609<br/>610<br/>611<br/>612<br/>613<br/>614<br/>615<br/>616<br/>617<br/>618<br/>619<br/>620<br/>621<br/>622<br/>623<br/>624<br/>625<br/>626<br/>627<br/>628<br/>629<br/>630<br/>631<br/>632<br/>633<br/>634<br/>635<br/>636<br/>637<br/>638<br/>639<br/>640<br/>641<br/>642<br/>643<br/>644<br/>645<br/>646<br/>647<br/>648<br/>649<br/>650<br/>651<br/>652<br/>653<br/>654<br/>655<br/>656<br/>657<br/>658<br/>659<br/>660<br/>661<br/>662<br/>663<br/>664<br/>665<br/>666<br/>667<br/>668<br/>669<br/>670<br/>671<br/>672<br/>673<br/>674<br/>675<br/>676<br/>677<br/>678<br/>679<br/>680<br/>681<br/>682<br/>683<br/>684<br/>685<br/>686<br/>687<br/>688<br/>689<br/>690<br/>691<br/>692<br/>693<br/>694<br/>695<br/>696<br/>697<br/>698<br/>699<br/>700<br/>701<br/>702<br/>703<br/>704<br/>705<br/>706<br/>707<br/>708<br/>709<br/>710<br/>711<br/>712<br/>713<br/>714<br/>715<br/>716<br/>717<br/>718<br/>719<br/>720<br/>721<br/>722<br/>723<br/>724<br/>725<br/>726<br/>727<br/>728<br/>729<br/>730<br/>731<br/>732<br/>733<br/>734<br/>735<br/>736<br/>737<br/>738<br/>739<br/>740<br/>741<br/>742<br/>743<br/>744<br/>745<br/>746<br/>747<br/>748<br/>749<br/>750<br/>751<br/>752<br/>753<br/>754<br/>755<br/>756<br/>757<br/>758<br/>759<br/>760<br/>761<br/>762<br/>763<br/>764<br/>765<br/>766<br/>767<br/>768<br/>769<br/>770<br/>771<br/>772<br/>773<br/>774<br/>775<br/>776<br/>777<br/>778<br/>779<br/>780<br/>781<br/>782<br/>783<br/>784<br/>785<br/>786<br/>787<br/>788<br/>789<br/>790<br/>791<br/>792<br/>793<br/>794<br/>795<br/>796<br/>797<br/>798<br/>799<br/>800<br/>801<br/>802<br/>803<br/>804<br/>805<br/>806<br/>807<br/>808<br/>809<br/>810<br/>811<br/>812<br/>813<br/>814<br/>815<br/>816<br/>817<br/>818<br/>819<br/>820<br/>821<br/>822<br/>823<br/>824<br/>825<br/>826<br/>827<br/>828<br/>829<br/>830<br/>831<br/>832<br/>833<br/>834<br/>835<br/>836<br/>837<br/>838<br/>839<br/>840<br/>841<br/>842<br/>843<br/>844<br/>845<br/>846<br/>847<br/>848<br/>849<br/>850<br/>851<br/>852<br/>853<br/>854<br/>855<br/>856<br/>857<br/>858<br/>859<br/>860<br/>861<br/>862<br/>863<br/>864<br/>865<br/>866<br/>867<br/>868<br/>869<br/>870<br/>871<br/>872<br/>873<br/>874<br/>875<br/>876<br/>877<br/>878<br/>879<br/>880<br/>881<br/>882<br/>883<br/>884<br/>885<br/>886<br/>887<br/>888<br/>889<br/>890<br/>891<br/>892<br/>893<br/>894<br/>895<br/>896<br/>897<br/>898<br/>899<br/>900<br/>901<br/>902<br/>903<br/>904<br/>905<br/>906<br/>907<br/>908<br/>909<br/>910<br/>911<br/>912<br/>913<br/>914<br/>915<br/>916<br/>917<br/>918<br/>919<br/>920<br/>921<br/>922<br/>923<br/>924<br/>925<br/>926<br/>927<br/>928<br/>929<br/>930<br/>931<br/>932<br/>933<br/>934<br/>935<br/>936<br/>937<br/>938<br/>939<br/>940<br/>941<br/>942<br/>943<br/>944<br/>945<br/>946<br/>947<br/>948<br/>949<br/>950<br/>951<br/>952<br/>953<br/>954<br/>955<br/>956<br/>957<br/>958<br/>959<br/>960<br/>961<br/>962<br/>963<br/>964<br/>965<br/>966<br/>967<br/>968<br/>969<br/>970<br/>971<br/>972<br/>973<br/>974<br/>975<br/>976<br/>977<br/>978<br/>979<br/>980<br/>981<br/>982<br/>983<br/>984<br/>985<br/>986<br/>987<br/>988<br/>989<br/>990<br/>991<br/>992<br/>993<br/>994<br/>995<br/>996<br/>997<br/>998<br/>999<br/>1000</p> |  |  |  |  |  |  |  |
|-----------------------------------------------------------------------------------------------------------------------------------------------------------------------------------------------------------------------------------------------------------------------------------------------------------------------------------------------------------------------------------------------------------------------------------------------------------------------------------------------------------------------------------------------------------------------------------------------------------------------------------------------------------------------------------------------------------------------------------------------------------------------------------------------------------------------------------------------------------------------------------------------------------------------------------------------------------------------------------------------------------------------------------------------------------------------------------------------------------------------------------------------------------------------------------------------------------------------------------------------------------------------------------------------------------------------------------------------------------------------------------------------------------------------------------------------------------------------------------------------------------------------------------------------------------------------------------------------------------------------------------------------------------------------------------------------------------------------------------------------------------------------------------------------------------------------------------------------------------------------------------------------------------------------------------------------------------------------------------------------------------------------------------------------------------------------------------------------------------------------------------------------------------------------------------------------------------------------------------------------------------------------------------------------------------------------------------------------------------------------------------------------------------------------------------------------------------------------------------------------------------------------------------------------------------------------------------------------------------------------------------------------------------------------------------------------------------------------------------------------------------------------------------------------------------------------------------------------------------------------------------------------------------------------------------------------------------------------------------------------------------------------------------------------------------------------------------------------------------------------------------------------------------------------------------------------------------------------------------------------------------------------------------------------------------------------------------------------------------------------------------------------------------------------------------------------------------------------------------------------------------------------------------------------------------------------------------------------------------------------------------------------------------------------------------------------------------------------------------------------------------------------------------------------------------------------------------------------------------------------------------------------------------------------------------------------------------------------------------------------------------------------------------------------------------------------------------------------------------------------------------------------------------------------------------------------------------------------------------------------------------------------------------------------------------------------------------------------------------------------------------------------------------------------------------------------------------------------------------------------------------------------------------------------------------------------------------------------------------------------------------------------------------------------------------------------------------------------------------------------------------------------------------------------------------------------------------------------------------------------------------------------------------------------------------------------------------------------------------------------------------------------------------------------------------------------------------------------------------------------------------------------------------------------------------------------------------------------------------------------------------------------------------------------------------------------------------------------------------------------------------------------------------------------------------------------------------------------------------------------------------------------------------------------------------------------------------------------------------------------------------------------------------------------------------------------------------------------------------------------------------------------------------------------------------------------------------------------------------------------------------------------------------------------------------------------------------------------------------------------------------------------------------------------------------------------------------------------------------------------------------------------------------------------------------------------------------------------------------------------------------------------------------------------------------------------------------------------------------------------------------------------------------------------------------------------------------------------------------------------------------------------------------------------------------------------------------------------------------------------------------------------------------------------------------------------------------------------------------------------------------------------------------------------------------------------------------------------------------------------------------------------------------------------------------------------------------------------------------------------------------------------------------------------------------------------------------------------------------------------------------------------------------------------------------------------------------------------------------------------------------------------------------------------------------------------------------------------------------------------------------------------------------------------------------------------------------------------------------------------------|--|--|--|--|--|--|--|

|                                                                                                                                                                                                                                                                                                                                                                                                                                                                                                                                                                                                                                                                                                                                                                                                                                                                                                                                                                                                                                                                                                                                                                                                                                                                                                                                                                                                                                                                                                                                                                                                                                                                                                                                                                                                                                                                                                                                                                                                                                                                                                                                                                                                                                                                                                                                                                                                                                                                                                                                                                                                                                                                                                                                                                                                                                                                                                                                                                                                                                                                                                                                                                                                                                                                                                                                                                                                                                                                                                                                                                                                                                                                                                                                                                                                                                                                                                                                                                                                                                                                                                                                                                                                                                                                                                                                                                                                                                                                                                                                                                                                                                                                                                                                                                                                                                                                                                                                                                                                                                                                                                                                                                                                                                                                                                                                                                                                                                                                                                                                                                                                                                                                                                                                                                                                                                                                                                                                                                                                                                                                                                                                                                                                                                                                                                                                                                                                                                                                                                                                                                                                                                                                                                                                                                                                                                                                                                                                                                                                                                                                                                                                                                                                                                                                                                                                                                                                                                                                                                                                                                                                                                                                                                                                                                                                                                                                                                                                                                                                                                                                                                                                                                                                                         |  |  |  |  |  |  |  |
|-------------------------------------------------------------------------------------------------------------------------------------------------------------------------------------------------------------------------------------------------------------------------------------------------------------------------------------------------------------------------------------------------------------------------------------------------------------------------------------------------------------------------------------------------------------------------------------------------------------------------------------------------------------------------------------------------------------------------------------------------------------------------------------------------------------------------------------------------------------------------------------------------------------------------------------------------------------------------------------------------------------------------------------------------------------------------------------------------------------------------------------------------------------------------------------------------------------------------------------------------------------------------------------------------------------------------------------------------------------------------------------------------------------------------------------------------------------------------------------------------------------------------------------------------------------------------------------------------------------------------------------------------------------------------------------------------------------------------------------------------------------------------------------------------------------------------------------------------------------------------------------------------------------------------------------------------------------------------------------------------------------------------------------------------------------------------------------------------------------------------------------------------------------------------------------------------------------------------------------------------------------------------------------------------------------------------------------------------------------------------------------------------------------------------------------------------------------------------------------------------------------------------------------------------------------------------------------------------------------------------------------------------------------------------------------------------------------------------------------------------------------------------------------------------------------------------------------------------------------------------------------------------------------------------------------------------------------------------------------------------------------------------------------------------------------------------------------------------------------------------------------------------------------------------------------------------------------------------------------------------------------------------------------------------------------------------------------------------------------------------------------------------------------------------------------------------------------------------------------------------------------------------------------------------------------------------------------------------------------------------------------------------------------------------------------------------------------------------------------------------------------------------------------------------------------------------------------------------------------------------------------------------------------------------------------------------------------------------------------------------------------------------------------------------------------------------------------------------------------------------------------------------------------------------------------------------------------------------------------------------------------------------------------------------------------------------------------------------------------------------------------------------------------------------------------------------------------------------------------------------------------------------------------------------------------------------------------------------------------------------------------------------------------------------------------------------------------------------------------------------------------------------------------------------------------------------------------------------------------------------------------------------------------------------------------------------------------------------------------------------------------------------------------------------------------------------------------------------------------------------------------------------------------------------------------------------------------------------------------------------------------------------------------------------------------------------------------------------------------------------------------------------------------------------------------------------------------------------------------------------------------------------------------------------------------------------------------------------------------------------------------------------------------------------------------------------------------------------------------------------------------------------------------------------------------------------------------------------------------------------------------------------------------------------------------------------------------------------------------------------------------------------------------------------------------------------------------------------------------------------------------------------------------------------------------------------------------------------------------------------------------------------------------------------------------------------------------------------------------------------------------------------------------------------------------------------------------------------------------------------------------------------------------------------------------------------------------------------------------------------------------------------------------------------------------------------------------------------------------------------------------------------------------------------------------------------------------------------------------------------------------------------------------------------------------------------------------------------------------------------------------------------------------------------------------------------------------------------------------------------------------------------------------------------------------------------------------------------------------------------------------------------------------------------------------------------------------------------------------------------------------------------------------------------------------------------------------------------------------------------------------------------------------------------------------------------------------------------------------------------------------------------------------------------------------------------------------------------------------------------------------------------------------------------------------------------------------------------------------------------------------------------------------------------------------------------------------------------------------------------------------------------------------------------------------------------------------------------------------------------------------------------------------------------------------------------------------------------|--|--|--|--|--|--|--|
| <p>1<br/>2<br/>3<br/>4<br/>5<br/>6<br/>7<br/>8<br/>9<br/>10<br/>11<br/>12<br/>13<br/>14<br/>15<br/>16<br/>17<br/>18<br/>19<br/>20<br/>21<br/>22<br/>23<br/>24<br/>25<br/>26<br/>27<br/>28<br/>29<br/>30<br/>31<br/>32<br/>33<br/>34<br/>35<br/>36<br/>37<br/>38<br/>39<br/>40<br/>41<br/>42<br/>43<br/>44<br/>45<br/>46<br/>47<br/>48<br/>49<br/>50<br/>51<br/>52<br/>53<br/>54<br/>55<br/>56<br/>57<br/>58<br/>59<br/>60<br/>61<br/>62<br/>63<br/>64<br/>65<br/>66<br/>67<br/>68<br/>69<br/>70<br/>71<br/>72<br/>73<br/>74<br/>75<br/>76<br/>77<br/>78<br/>79<br/>80<br/>81<br/>82<br/>83<br/>84<br/>85<br/>86<br/>87<br/>88<br/>89<br/>90<br/>91<br/>92<br/>93<br/>94<br/>95<br/>96<br/>97<br/>98<br/>99<br/>100<br/>101<br/>102<br/>103<br/>104<br/>105<br/>106<br/>107<br/>108<br/>109<br/>110<br/>111<br/>112<br/>113<br/>114<br/>115<br/>116<br/>117<br/>118<br/>119<br/>120<br/>121<br/>122<br/>123<br/>124<br/>125<br/>126<br/>127<br/>128<br/>129<br/>130<br/>131<br/>132<br/>133<br/>134<br/>135<br/>136<br/>137<br/>138<br/>139<br/>140<br/>141<br/>142<br/>143<br/>144<br/>145<br/>146<br/>147<br/>148<br/>149<br/>150<br/>151<br/>152<br/>153<br/>154<br/>155<br/>156<br/>157<br/>158<br/>159<br/>160<br/>161<br/>162<br/>163<br/>164<br/>165<br/>166<br/>167<br/>168<br/>169<br/>170<br/>171<br/>172<br/>173<br/>174<br/>175<br/>176<br/>177<br/>178<br/>179<br/>180<br/>181<br/>182<br/>183<br/>184<br/>185<br/>186<br/>187<br/>188<br/>189<br/>190<br/>191<br/>192<br/>193<br/>194<br/>195<br/>196<br/>197<br/>198<br/>199<br/>200<br/>201<br/>202<br/>203<br/>204<br/>205<br/>206<br/>207<br/>208<br/>209<br/>210<br/>211<br/>212<br/>213<br/>214<br/>215<br/>216<br/>217<br/>218<br/>219<br/>220<br/>221<br/>222<br/>223<br/>224<br/>225<br/>226<br/>227<br/>228<br/>229<br/>230<br/>231<br/>232<br/>233<br/>234<br/>235<br/>236<br/>237<br/>238<br/>239<br/>240<br/>241<br/>242<br/>243<br/>244<br/>245<br/>246<br/>247<br/>248<br/>249<br/>250<br/>251<br/>252<br/>253<br/>254<br/>255<br/>256<br/>257<br/>258<br/>259<br/>260<br/>261<br/>262<br/>263<br/>264<br/>265<br/>266<br/>267<br/>268<br/>269<br/>270<br/>271<br/>272<br/>273<br/>274<br/>275<br/>276<br/>277<br/>278<br/>279<br/>280<br/>281<br/>282<br/>283<br/>284<br/>285<br/>286<br/>287<br/>288<br/>289<br/>290<br/>291<br/>292<br/>293<br/>294<br/>295<br/>296<br/>297<br/>298<br/>299<br/>300<br/>301<br/>302<br/>303<br/>304<br/>305<br/>306<br/>307<br/>308<br/>309<br/>310<br/>311<br/>312<br/>313<br/>314<br/>315<br/>316<br/>317<br/>318<br/>319<br/>320<br/>321<br/>322<br/>323<br/>324<br/>325<br/>326<br/>327<br/>328<br/>329<br/>330<br/>331<br/>332<br/>333<br/>334<br/>335<br/>336<br/>337<br/>338<br/>339<br/>340<br/>341<br/>342<br/>343<br/>344<br/>345<br/>346<br/>347<br/>348<br/>349<br/>350<br/>351<br/>352<br/>353<br/>354<br/>355<br/>356<br/>357<br/>358<br/>359<br/>360<br/>361<br/>362<br/>363<br/>364<br/>365<br/>366<br/>367<br/>368<br/>369<br/>370<br/>371<br/>372<br/>373<br/>374<br/>375<br/>376<br/>377<br/>378<br/>379<br/>380<br/>381<br/>382<br/>383<br/>384<br/>385<br/>386<br/>387<br/>388<br/>389<br/>390<br/>391<br/>392<br/>393<br/>394<br/>395<br/>396<br/>397<br/>398<br/>399<br/>400<br/>401<br/>402<br/>403<br/>404<br/>405<br/>406<br/>407<br/>408<br/>409<br/>410<br/>411<br/>412<br/>413<br/>414<br/>415<br/>416<br/>417<br/>418<br/>419<br/>420<br/>421<br/>422<br/>423<br/>424<br/>425<br/>426<br/>427<br/>428<br/>429<br/>430<br/>431<br/>432<br/>433<br/>434<br/>435<br/>436<br/>437<br/>438<br/>439<br/>440<br/>441<br/>442<br/>443<br/>444<br/>445<br/>446<br/>447<br/>448<br/>449<br/>450<br/>451<br/>452<br/>453<br/>454<br/>455<br/>456<br/>457<br/>458<br/>459<br/>460<br/>461<br/>462<br/>463<br/>464<br/>465<br/>466<br/>467<br/>468<br/>469<br/>470<br/>471<br/>472<br/>473<br/>474<br/>475<br/>476<br/>477<br/>478<br/>479<br/>480<br/>481<br/>482<br/>483<br/>484<br/>485<br/>486<br/>487<br/>488<br/>489<br/>490<br/>491<br/>492<br/>493<br/>494<br/>495<br/>496<br/>497<br/>498<br/>499<br/>500<br/>501<br/>502<br/>503<br/>504<br/>505<br/>506<br/>507<br/>508<br/>509<br/>510<br/>511<br/>512<br/>513<br/>514<br/>515<br/>516<br/>517<br/>518<br/>519<br/>520<br/>521<br/>522<br/>523<br/>524<br/>525<br/>526<br/>527<br/>528<br/>529<br/>530<br/>531<br/>532<br/>533<br/>534<br/>535<br/>536<br/>537<br/>538<br/>539<br/>540<br/>541<br/>542<br/>543<br/>544<br/>545<br/>546<br/>547<br/>548<br/>549<br/>550<br/>551<br/>552<br/>553<br/>554<br/>555<br/>556<br/>557<br/>558<br/>559<br/>560<br/>561<br/>562<br/>563<br/>564<br/>565<br/>566<br/>567<br/>568<br/>569<br/>570<br/>571<br/>572<br/>573<br/>574<br/>575<br/>576<br/>577<br/>578<br/>579<br/>580<br/>581<br/>582<br/>583<br/>584<br/>585<br/>586<br/>587<br/>588<br/>589<br/>590<br/>591<br/>592<br/>593<br/>594<br/>595<br/>596<br/>597<br/>598<br/>599<br/>600<br/>601<br/>602<br/>603<br/>604<br/>605<br/>606<br/>607<br/>608<br/>609<br/>610<br/>611<br/>612<br/>613<br/>614<br/>615<br/>616<br/>617<br/>618<br/>619<br/>620<br/>621<br/>622<br/>623<br/>624<br/>625<br/>626<br/>627<br/>628<br/>629<br/>630<br/>631<br/>632<br/>633<br/>634<br/>635<br/>636<br/>637<br/>638<br/>639<br/>640<br/>641<br/>642<br/>643<br/>644<br/>645<br/>646<br/>647<br/>648<br/>649<br/>650<br/>651<br/>652<br/>653<br/>654<br/>655<br/>656<br/>657<br/>658<br/>659<br/>660<br/>661<br/>662<br/>663<br/>664<br/>665<br/>666<br/>667<br/>668<br/>669<br/>670<br/>671<br/>672<br/>673<br/>674<br/>675<br/>676<br/>677<br/>678<br/>679<br/>680<br/>681<br/>682<br/>683<br/>684<br/>685<br/>686<br/>687<br/>688<br/>689<br/>690<br/>691<br/>692<br/>693<br/>694<br/>695<br/>696<br/>697<br/>698<br/>699<br/>700<br/>701<br/>702<br/>703<br/>704<br/>705<br/>706<br/>707<br/>708<br/>709<br/>710<br/>711<br/>712<br/>713<br/>714<br/>715<br/>716<br/>717<br/>718<br/>719<br/>720<br/>721<br/>722<br/>723<br/>724<br/>725<br/>726<br/>727<br/>728<br/>729<br/>730<br/>731<br/>732<br/>733<br/>734<br/>735<br/>736<br/>737<br/>738<br/>739<br/>740<br/>741<br/>742<br/>743<br/>744<br/>745<br/>746<br/>747<br/>748<br/>749<br/>750<br/>751<br/>752<br/>753<br/>754<br/>755<br/>756<br/>757<br/>758<br/>759<br/>760<br/>761<br/>762<br/>763<br/>764<br/>765<br/>766<br/>767<br/>768<br/>769<br/>770<br/>771<br/>772<br/>773<br/>774<br/>775<br/>776<br/>777<br/>778<br/>779<br/>780<br/>781<br/>782<br/>783<br/>784<br/>785<br/>786<br/>787<br/>788<br/>789<br/>790<br/>791<br/>792<br/>793<br/>794<br/>795<br/>796<br/>797<br/>798<br/>799<br/>800<br/>801<br/>802<br/>803<br/>804<br/>805<br/>806<br/>807<br/>808<br/>809<br/>810<br/>811<br/>812<br/>813<br/>814<br/>815<br/>816<br/>817<br/>818<br/>819<br/>820<br/>821<br/>822<br/>823<br/>824<br/>825<br/>826<br/>827<br/>828<br/>829<br/>830<br/>831<br/>832<br/>833<br/>834<br/>835<br/>836<br/>837<br/>838<br/>839<br/>840<br/>841<br/>842<br/>843<br/>844<br/>845<br/>846<br/>847<br/>848<br/>849<br/>850<br/>851<br/>852<br/>853<br/>854<br/>855<br/>856<br/>857<br/>858<br/>859<br/>860<br/>861<br/>862<br/>863<br/>864<br/>865<br/>866<br/>867<br/>868<br/>869<br/>870<br/>871<br/>872<br/>873<br/>874<br/>875<br/>876<br/>877<br/>878<br/>879<br/>880<br/>881<br/>882<br/>883<br/>884<br/>885<br/>886<br/>887<br/>888<br/>889<br/>890<br/>891<br/>892<br/>893<br/>894<br/>895<br/>896<br/>897<br/>898<br/>899<br/>900<br/>901<br/>902<br/>903<br/>904<br/>905<br/>906<br/>907<br/>908<br/>909<br/>910<br/>911<br/>912<br/>913<br/>914<br/>915<br/>916<br/>917<br/>918<br/>919<br/>920<br/>921<br/>922<br/>923<br/>924<br/>925<br/>926<br/>927<br/>928<br/>929<br/>930<br/>931<br/>932<br/>933<br/>934<br/>935<br/>936<br/>937<br/>938<br/>939<br/>940<br/>941<br/>942<br/>943<br/>944<br/>945<br/>946<br/>947<br/>948<br/>949<br/>950<br/>951<br/>952<br/>953<br/>954<br/>955<br/>956<br/>957<br/>958<br/>959<br/>960<br/>961<br/>962<br/>963<br/>964<br/>965<br/>966<br/>967<br/>968<br/>969<br/>970<br/>971<br/>972<br/>973<br/>974<br/>975<br/>976<br/>977<br/>978<br/>979<br/>980<br/>981<br/>982<br/>983<br/>984<br/>985<br/>986<br/>987<br/>988<br/>989<br/>990<br/>991<br/>992<br/>993<br/>994<br/>995<br/>996<br/>997<br/>998<br/>999<br/>1000</p> |  |  |  |  |  |  |  |
|-------------------------------------------------------------------------------------------------------------------------------------------------------------------------------------------------------------------------------------------------------------------------------------------------------------------------------------------------------------------------------------------------------------------------------------------------------------------------------------------------------------------------------------------------------------------------------------------------------------------------------------------------------------------------------------------------------------------------------------------------------------------------------------------------------------------------------------------------------------------------------------------------------------------------------------------------------------------------------------------------------------------------------------------------------------------------------------------------------------------------------------------------------------------------------------------------------------------------------------------------------------------------------------------------------------------------------------------------------------------------------------------------------------------------------------------------------------------------------------------------------------------------------------------------------------------------------------------------------------------------------------------------------------------------------------------------------------------------------------------------------------------------------------------------------------------------------------------------------------------------------------------------------------------------------------------------------------------------------------------------------------------------------------------------------------------------------------------------------------------------------------------------------------------------------------------------------------------------------------------------------------------------------------------------------------------------------------------------------------------------------------------------------------------------------------------------------------------------------------------------------------------------------------------------------------------------------------------------------------------------------------------------------------------------------------------------------------------------------------------------------------------------------------------------------------------------------------------------------------------------------------------------------------------------------------------------------------------------------------------------------------------------------------------------------------------------------------------------------------------------------------------------------------------------------------------------------------------------------------------------------------------------------------------------------------------------------------------------------------------------------------------------------------------------------------------------------------------------------------------------------------------------------------------------------------------------------------------------------------------------------------------------------------------------------------------------------------------------------------------------------------------------------------------------------------------------------------------------------------------------------------------------------------------------------------------------------------------------------------------------------------------------------------------------------------------------------------------------------------------------------------------------------------------------------------------------------------------------------------------------------------------------------------------------------------------------------------------------------------------------------------------------------------------------------------------------------------------------------------------------------------------------------------------------------------------------------------------------------------------------------------------------------------------------------------------------------------------------------------------------------------------------------------------------------------------------------------------------------------------------------------------------------------------------------------------------------------------------------------------------------------------------------------------------------------------------------------------------------------------------------------------------------------------------------------------------------------------------------------------------------------------------------------------------------------------------------------------------------------------------------------------------------------------------------------------------------------------------------------------------------------------------------------------------------------------------------------------------------------------------------------------------------------------------------------------------------------------------------------------------------------------------------------------------------------------------------------------------------------------------------------------------------------------------------------------------------------------------------------------------------------------------------------------------------------------------------------------------------------------------------------------------------------------------------------------------------------------------------------------------------------------------------------------------------------------------------------------------------------------------------------------------------------------------------------------------------------------------------------------------------------------------------------------------------------------------------------------------------------------------------------------------------------------------------------------------------------------------------------------------------------------------------------------------------------------------------------------------------------------------------------------------------------------------------------------------------------------------------------------------------------------------------------------------------------------------------------------------------------------------------------------------------------------------------------------------------------------------------------------------------------------------------------------------------------------------------------------------------------------------------------------------------------------------------------------------------------------------------------------------------------------------------------------------------------------------------------------------------------------------------------------------------------------------------------------------------------------------------------------------------------------------------------------------------------------------------------------------------------------------------------------------------------------------------------------------------------------------------------------------------------------------------------------------------------------------------------------------------------------------------------------------------------------------------------------------------------------------|--|--|--|--|--|--|--|





|                                                                                                                                                                                                                                                                                                                                                                                                                                                                                                                                                                                                                                                                                                                                                                                                                                                                                                                                                                                                                                                                                                                                                                                                                                                                                                                                                                                                                                                                                                                                                                                                                                                                                                                                                                                                                                                                                                                                                                                                                                                                                                                                                                                                                                                                                                                            |  |  |  |  |  |  |  |
|----------------------------------------------------------------------------------------------------------------------------------------------------------------------------------------------------------------------------------------------------------------------------------------------------------------------------------------------------------------------------------------------------------------------------------------------------------------------------------------------------------------------------------------------------------------------------------------------------------------------------------------------------------------------------------------------------------------------------------------------------------------------------------------------------------------------------------------------------------------------------------------------------------------------------------------------------------------------------------------------------------------------------------------------------------------------------------------------------------------------------------------------------------------------------------------------------------------------------------------------------------------------------------------------------------------------------------------------------------------------------------------------------------------------------------------------------------------------------------------------------------------------------------------------------------------------------------------------------------------------------------------------------------------------------------------------------------------------------------------------------------------------------------------------------------------------------------------------------------------------------------------------------------------------------------------------------------------------------------------------------------------------------------------------------------------------------------------------------------------------------------------------------------------------------------------------------------------------------------------------------------------------------------------------------------------------------|--|--|--|--|--|--|--|
| <p>1. The first part of the document discusses the importance of maintaining accurate records of all transactions. It emphasizes that proper record-keeping is essential for the integrity of the financial system and for the ability to detect and prevent fraud. The text notes that without reliable records, it would be difficult to verify the accuracy of financial statements and to identify any discrepancies or irregularities.</p> <p>2. The second part of the document focuses on the role of internal controls in ensuring the reliability of financial information. It describes how internal controls are designed to prevent errors and fraud by establishing a system of checks and balances. The text highlights that internal controls should be tailored to the specific needs of the organization and should be regularly reviewed and updated to reflect changes in the business environment.</p> <p>3. The third part of the document discusses the importance of transparency and accountability in financial reporting. It states that organizations should provide clear and concise information about their financial performance and should be open to external scrutiny. The text notes that transparency is not only a requirement of good governance but also a key factor in building trust with stakeholders.</p> <p>4. The fourth part of the document addresses the challenges of financial reporting in a complex and rapidly changing world. It identifies several key challenges, including the increasing volume of data, the need for real-time reporting, and the growing importance of non-financial information. The text suggests that organizations should invest in technology and talent to overcome these challenges and to ensure that their financial reporting remains relevant and reliable.</p> <p>5. The fifth part of the document concludes by emphasizing the need for a strong ethical culture within organizations. It states that ethical behavior is the foundation of trust and integrity, and that organizations should strive to create a culture where ethical values are embedded in all aspects of their operations. The text notes that a strong ethical culture is essential for the long-term success and sustainability of any organization.</p> |  |  |  |  |  |  |  |
|----------------------------------------------------------------------------------------------------------------------------------------------------------------------------------------------------------------------------------------------------------------------------------------------------------------------------------------------------------------------------------------------------------------------------------------------------------------------------------------------------------------------------------------------------------------------------------------------------------------------------------------------------------------------------------------------------------------------------------------------------------------------------------------------------------------------------------------------------------------------------------------------------------------------------------------------------------------------------------------------------------------------------------------------------------------------------------------------------------------------------------------------------------------------------------------------------------------------------------------------------------------------------------------------------------------------------------------------------------------------------------------------------------------------------------------------------------------------------------------------------------------------------------------------------------------------------------------------------------------------------------------------------------------------------------------------------------------------------------------------------------------------------------------------------------------------------------------------------------------------------------------------------------------------------------------------------------------------------------------------------------------------------------------------------------------------------------------------------------------------------------------------------------------------------------------------------------------------------------------------------------------------------------------------------------------------------|--|--|--|--|--|--|--|

|     |     |     |     |     |     |     |      |
|-----|-----|-----|-----|-----|-----|-----|------|
| 1   | 2   | 3   | 4   | 5   | 6   | 7   | 8    |
| 9   | 10  | 11  | 12  | 13  | 14  | 15  | 16   |
| 17  | 18  | 19  | 20  | 21  | 22  | 23  | 24   |
| 25  | 26  | 27  | 28  | 29  | 30  | 31  | 32   |
| 33  | 34  | 35  | 36  | 37  | 38  | 39  | 40   |
| 41  | 42  | 43  | 44  | 45  | 46  | 47  | 48   |
| 49  | 50  | 51  | 52  | 53  | 54  | 55  | 56   |
| 57  | 58  | 59  | 60  | 61  | 62  | 63  | 64   |
| 65  | 66  | 67  | 68  | 69  | 70  | 71  | 72   |
| 73  | 74  | 75  | 76  | 77  | 78  | 79  | 80   |
| 81  | 82  | 83  | 84  | 85  | 86  | 87  | 88   |
| 89  | 90  | 91  | 92  | 93  | 94  | 95  | 96   |
| 97  | 98  | 99  | 100 | 101 | 102 | 103 | 104  |
| 105 | 106 | 107 | 108 | 109 | 110 | 111 | 112  |
| 113 | 114 | 115 | 116 | 117 | 118 | 119 | 120  |
| 121 | 122 | 123 | 124 | 125 | 126 | 127 | 128  |
| 129 | 130 | 131 | 132 | 133 | 134 | 135 | 136  |
| 137 | 138 | 139 | 140 | 141 | 142 | 143 | 144  |
| 145 | 146 | 147 | 148 | 149 | 150 | 151 | 152  |
| 153 | 154 | 155 | 156 | 157 | 158 | 159 | 160  |
| 161 | 162 | 163 | 164 | 165 | 166 | 167 | 168  |
| 169 | 170 | 171 | 172 | 173 | 174 | 175 | 176  |
| 177 | 178 | 179 | 180 | 181 | 182 | 183 | 184  |
| 185 | 186 | 187 | 188 | 189 | 190 | 191 | 192  |
| 193 | 194 | 195 | 196 | 197 | 198 | 199 | 200  |
| 201 | 202 | 203 | 204 | 205 | 206 | 207 | 208  |
| 209 | 210 | 211 | 212 | 213 | 214 | 215 | 216  |
| 217 | 218 | 219 | 220 | 221 | 222 | 223 | 224  |
| 225 | 226 | 227 | 228 | 229 | 230 | 231 | 232  |
| 233 | 234 | 235 | 236 | 237 | 238 | 239 | 240  |
| 241 | 242 | 243 | 244 | 245 | 246 | 247 | 248  |
| 249 | 250 | 251 | 252 | 253 | 254 | 255 | 256  |
| 257 | 258 | 259 | 260 | 261 | 262 | 263 | 264  |
| 265 | 266 | 267 | 268 | 269 | 270 | 271 | 272  |
| 273 | 274 | 275 | 276 | 277 | 278 | 279 | 280  |
| 281 | 282 | 283 | 284 | 285 | 286 | 287 | 288  |
| 289 | 290 | 291 | 292 | 293 | 294 | 295 | 296  |
| 297 | 298 | 299 | 300 | 301 | 302 | 303 | 304  |
| 305 | 306 | 307 | 308 | 309 | 310 | 311 | 312  |
| 313 | 314 | 315 | 316 | 317 | 318 | 319 | 320  |
| 321 | 322 | 323 | 324 | 325 | 326 | 327 | 328  |
| 329 | 330 | 331 | 332 | 333 | 334 | 335 | 336  |
| 337 | 338 | 339 | 340 | 341 | 342 | 343 | 344  |
| 345 | 346 | 347 | 348 | 349 | 350 | 351 | 352  |
| 353 | 354 | 355 | 356 | 357 | 358 | 359 | 360  |
| 361 | 362 | 363 | 364 | 365 | 366 | 367 | 368  |
| 369 | 370 | 371 | 372 | 373 | 374 | 375 | 376  |
| 377 | 378 | 379 | 380 | 381 | 382 | 383 | 384  |
| 385 | 386 | 387 | 388 | 389 | 390 | 391 | 392  |
| 393 | 394 | 395 | 396 | 397 | 398 | 399 | 400  |
| 401 | 402 | 403 | 404 | 405 | 406 | 407 | 408  |
| 409 | 410 | 411 | 412 | 413 | 414 | 415 | 416  |
| 417 | 418 | 419 | 420 | 421 | 422 | 423 | 424  |
| 425 | 426 | 427 | 428 | 429 | 430 | 431 | 432  |
| 433 | 434 | 435 | 436 | 437 | 438 | 439 | 440  |
| 441 | 442 | 443 | 444 | 445 | 446 | 447 | 448  |
| 449 | 450 | 451 | 452 | 453 | 454 | 455 | 456  |
| 457 | 458 | 459 | 460 | 461 | 462 | 463 | 464  |
| 465 | 466 | 467 | 468 | 469 | 470 | 471 | 472  |
| 473 | 474 | 475 | 476 | 477 | 478 | 479 | 480  |
| 481 | 482 | 483 | 484 | 485 | 486 | 487 | 488  |
| 489 | 490 | 491 | 492 | 493 | 494 | 495 | 496  |
| 497 | 498 | 499 | 500 | 501 | 502 | 503 | 504  |
| 505 | 506 | 507 | 508 | 509 | 510 | 511 | 512  |
| 513 | 514 | 515 | 516 | 517 | 518 | 519 | 520  |
| 521 | 522 | 523 | 524 | 525 | 526 | 527 | 528  |
| 529 | 530 | 531 | 532 | 533 | 534 | 535 | 536  |
| 537 | 538 | 539 | 540 | 541 | 542 | 543 | 544  |
| 545 | 546 | 547 | 548 | 549 | 550 | 551 | 552  |
| 553 | 554 | 555 | 556 | 557 | 558 | 559 | 560  |
| 561 | 562 | 563 | 564 | 565 | 566 | 567 | 568  |
| 569 | 570 | 571 | 572 | 573 | 574 | 575 | 576  |
| 577 | 578 | 579 | 580 | 581 | 582 | 583 | 584  |
| 585 | 586 | 587 | 588 | 589 | 590 | 591 | 592  |
| 593 | 594 | 595 | 596 | 597 | 598 | 599 | 600  |
| 601 | 602 | 603 | 604 | 605 | 606 | 607 | 608  |
| 609 | 610 | 611 | 612 | 613 | 614 | 615 | 616  |
| 617 | 618 | 619 | 620 | 621 | 622 | 623 | 624  |
| 625 | 626 | 627 | 628 | 629 | 630 | 631 | 632  |
| 633 | 634 | 635 | 636 | 637 | 638 | 639 | 640  |
| 641 | 642 | 643 | 644 | 645 | 646 | 647 | 648  |
| 649 | 650 | 651 | 652 | 653 | 654 | 655 | 656  |
| 657 | 658 | 659 | 660 | 661 | 662 | 663 | 664  |
| 665 | 666 | 667 | 668 | 669 | 670 | 671 | 672  |
| 673 | 674 | 675 | 676 | 677 | 678 | 679 | 680  |
| 681 | 682 | 683 | 684 | 685 | 686 | 687 | 688  |
| 689 | 690 | 691 | 692 | 693 | 694 | 695 | 696  |
| 697 | 698 | 699 | 700 | 701 | 702 | 703 | 704  |
| 705 | 706 | 707 | 708 | 709 | 710 | 711 | 712  |
| 713 | 714 | 715 | 716 | 717 | 718 | 719 | 720  |
| 721 | 722 | 723 | 724 | 725 | 726 | 727 | 728  |
| 729 | 730 | 731 | 732 | 733 | 734 | 735 | 736  |
| 737 | 738 | 739 | 740 | 741 | 742 | 743 | 744  |
| 745 | 746 | 747 | 748 | 749 | 750 | 751 | 752  |
| 753 | 754 | 755 | 756 | 757 | 758 | 759 | 760  |
| 761 | 762 | 763 | 764 | 765 | 766 | 767 | 768  |
| 769 | 770 | 771 | 772 | 773 | 774 | 775 | 776  |
| 777 | 778 | 779 | 780 | 781 | 782 | 783 | 784  |
| 785 | 786 | 787 | 788 | 789 | 790 | 791 | 792  |
| 793 | 794 | 795 | 796 | 797 | 798 | 799 | 800  |
| 801 | 802 | 803 | 804 | 805 | 806 | 807 | 808  |
| 809 | 810 | 811 | 812 | 813 | 814 | 815 | 816  |
| 817 | 818 | 819 | 820 | 821 | 822 | 823 | 824  |
| 825 | 826 | 827 | 828 | 829 | 830 | 831 | 832  |
| 833 | 834 | 835 | 836 | 837 | 838 | 839 | 840  |
| 841 | 842 | 843 | 844 | 845 | 846 | 847 | 848  |
| 849 | 850 | 851 | 852 | 853 | 854 | 855 | 856  |
| 857 | 858 | 859 | 860 | 861 | 862 | 863 | 864  |
| 865 | 866 | 867 | 868 | 869 | 870 | 871 | 872  |
| 873 | 874 | 875 | 876 | 877 | 878 | 879 | 880  |
| 881 | 882 | 883 | 884 | 885 | 886 | 887 | 888  |
| 889 | 890 | 891 | 892 | 893 | 894 | 895 | 896  |
| 897 | 898 | 899 | 900 | 901 | 902 | 903 | 904  |
| 905 | 906 | 907 | 908 | 909 | 910 | 911 | 912  |
| 913 | 914 | 915 | 916 | 917 | 918 | 919 | 920  |
| 921 | 922 | 923 | 924 | 925 | 926 | 927 | 928  |
| 929 | 930 | 931 | 932 | 933 | 934 | 935 | 936  |
| 937 | 938 | 939 | 940 | 941 | 942 | 943 | 944  |
| 945 | 946 | 947 | 948 | 949 | 950 | 951 | 952  |
| 953 | 954 | 955 | 956 | 957 | 958 | 959 | 960  |
| 961 | 962 | 963 | 964 | 965 | 966 | 967 | 968  |
| 969 | 970 | 971 | 972 | 973 | 974 | 975 | 976  |
| 977 | 978 | 979 | 980 | 981 | 982 | 983 | 984  |
| 985 | 986 | 987 | 988 | 989 | 990 | 991 | 992  |
| 993 | 994 | 995 | 996 | 997 | 998 | 999 | 1000 |
