# Supplementary material
Source: PubMed Central journal article supplement (PMC3208663)
Supplement: supp_184_8_957__5.pdf [file supp_184_8_957__5.pdf]

Table E3

| OTU ID | OTU   | Consensus Lineage                                                                                                                             |
|--------|-------|-----------------------------------------------------------------------------------------------------------------------------------------------|
| Number | count |                                                                                                                                               |
| 5450   | 32    | Root; Bacteria; Actinobacteria; Actinobacteria; Actinobacteridae; Actinomycetales; Micrococcineae; Cellulomonadaceae; Tropheryma              |
| 3145   | 19    | Root; Bacteria; Firmicutes; "Bacilli"; Bacillales; "Paenibacillaceae"; "Paenibacillaceae 1"; Paenibacillus                                    |
| 2453   | 18    | Root; Bacteria; Firmicutes; "Bacilli"; Bacillales; Bacillaceae; "Bacillaceae 2"; Virgibacillus                                                |
| 520    | 13    | Root; Bacteria; Actinobacteria; Actinobacteria; Actinobacteridae; Actinomycetales; Micrococcineae; Microbacteriaceae; Microbacterium          |
| 4217   | 12    | Root; Bacteria; Actinobacteria; Actinobacteria; Actinobacteridae; Actinomycetales; Micrococcineae; Intrasporengiaceae; Terrabacter            |
| 229    | 10    | Root; Bacteria; Fusobacteria; Fusobacteria; Fusobacteriales; Fusobacteriaceae; Fusobacterium                                                  |
| 2616   | 10    | Root; Bacteria; Firmicutes; "Clostridia"; Clostridiales; "Peptostreptococcaceae"; "Peptostreptococcaceae Incertae Sedis"                      |
| 5168   | 8     | Root; Bacteria; Firmicutes; "Bacilli"; Bacillales; Bacillaceae; "Bacillaceae 2"; Oceanobacillus                                               |
| 3320   | 6     | Root; Bacteria; Firmicutes; "Bacilli"; Bacillales; "Paenibacillaceae"; "Paenibacillaceae 1"                                                   |
| 1387   | 5     | Root; Bacteria; Actinobacteria; Actinobacteria; Actinobacteridae; Actinomycetales; Micrococcineae; Microbacteriaceae; Microbacterium          |
| 1735   | 5     | Root; Bacteria; Actinobacteria; Actinobacteria; Actinobacteridae; Actinomycetales; Micrococcineae; Micrococcaceae; Nesterenkonia              |
| 2460   | 5     | Root; Bacteria; Bacteroidetes; Sphingobacteria; Sphingobacteriales; Flexibacteraceae                                                          |
| 1933   | 4     | Root; Bacteria; Fusobacteria; Fusobacteria; Fusobacteriales; Fusobacteriaceae                                                                 |
| 1974   | 4     | Root; Bacteria; Firmicutes; "Bacilli"; "Lactobacillales"; Streptococcaceae; Streptococcus                                                     |
| 2189   | 4     | Root; Bacteria; Firmicutes; "Erysipelotrichi"; "Erysipelotrichales"; Erysipelotrichaceae; Turicibacter                                        |
| 2779   | 4     | Root; Bacteria; Firmicutes; "Erysipelotrichi"; "Erysipelotrichales"; Erysipelotrichaceae; Erysipelotrichaceae Incertae Sedis                  |
| 3675   | 4     | Root; Bacteria; Proteobacteria; Alphaproteobacteria; Rhizobiales                                                                              |
| 17     | 3     | Root; Bacteria                                                                                                                                |
| 427    | 3     | Root; Bacteria; Firmicutes; "Bacilli"; "Lactobacillales"; Lactobacillaceae; Lactobacillus                                                     |
| 873    | 3     | Root; Bacteria; Bacteroidetes; Sphingobacteria; Sphingobacteriales; Flexibacteraceae; Niastella                                               |
| 1135   | 3     | Root; Bacteria; Bacteroidetes; Sphingobacteria; Sphingobacteriales; Flexibacteraceae                                                          |
| 1584   | 3     | Root; Bacteria; Bacteroidetes; Bacteroidetes; Bacteroidales; Porphyromonadaceae; Parabacteroides                                              |
| 2734   | 3     | Root; Bacteria; Spirochaetes; Spirochaetes; Spirochaetales; Spirochaetaceae; Treponema                                                        |
| 3585   | 3     | Root; Bacteria; Bacteroidetes                                                                                                                 |
| 3969   | 3     | Root; Bacteria; Bacteroidetes; Flavobacteria; Flavobacteriales; Flavobacteriaceae; Flavobacterium                                             |
| 5504   | 3     | Root; Bacteria; Firmicutes; "Clostridia"; Clostridiales; Veillonellaceae                                                                      |
| 4      | 2     | Root; Bacteria; Bacteroidetes; Bacteroidetes; Bacteroidales; Prevotellaceae; Prevotella                                                       |
| 217    | 2     | Root; Bacteria; Actinobacteria; Actinobacteria; Actinobacteridae; Actinomycetales; Micrococcineae                                             |
| 500    | 2     | Root; Bacteria; Acidobacteria; Acidobacteria; Acidobacteriales; Acidobacteriaceae; Gp6                                                        |
| 726    | 2     | Root; Bacteria; Actinobacteria; Actinobacteria; Actinobacteridae; Actinomycetales; Corynebacterineae; Nocardiaceae; Rhodococcus               |
| 1048   | 2     | Root; Bacteria; TM7; TM7_genera_incertae_sedis                                                                                                |
| 1344   | 2     | Root; Bacteria; Proteobacteria; Deltaproteobacteria; Myxococcales; Cystobacterineae                                                           |
| 1764   | 2     | Root; Bacteria; Firmicutes; "Clostridia"; Clostridiales; "Eubacteriaceae"; Pseudoramibacter                                                   |
| 1765   | 2     | Root; Bacteria; Firmicutes; "Clostridia"; Clostridiales                                                                                       |
| 2043   | 2     | Root; Bacteria; Proteobacteria; Deltaproteobacteria; Myxococcales                                                                             |
| 2114   | 2     | Root; Bacteria; Firmicutes; "Clostridia"; Clostridiales; Veillonellaceae; Veillonella                                                         |
| 2345   | 2     | Root; Bacteria; Verrucomicrobia; Verrucomicrobiae; Verrucomicrobiales; Xiphinematobacteriaceae; Xiphinematobacteriaceae_genera_incertae_sedis |
| 2711   | 2     | Root; Bacteria; Actinobacteria; Actinobacteria; Actinobacteridae; Actinomycetales; Pseudonocardineae; Pseudonocardiaceae; Saccharopolyspora   |
| 2940   | 2     | Root; Bacteria; Firmicutes; "Clostridia"; Clostridiales; Veillonellaceae; Veillonella                                                         |
| 2957   | 2     | Root; Bacteria; Firmicutes; "Bacilli"; "Lactobacillales"; "Leuconostocaceae"; Weissella                                                       |
| 3094   | 2     | Root; Bacteria; Proteobacteria; Betaproteobacteria; Burkholderiales                                                                           |
| 3465   | 2     | Root; Bacteria; Proteobacteria; Alphaproteobacteria; Rhodospirillales; Acetobacteraceae; Roseomonas                                           |
| 3587   | 2     | Root; Bacteria; Fusobacteria; Fusobacteria; Fusobacteriales                                                                                   |
| 3603   | 2     | Root; Bacteria; Bacteroidetes; Sphingobacteria; Sphingobacteriales; Sphingobacteriaceae; Pedobacter                                           |
| 3637   | 2     | Root; Bacteria; Proteobacteria; Gammaproteobacteria; Oceanospirillales; Halomonadaceae; Halomonas                                             |
| 3751   | 2     | Root; Bacteria; Actinobacteria; Actinobacteria; Actinobacteridae; Actinomycetales; Micrococcineae; Microbacteriaceae                          |

3760 2 Root; Bacteria; Actinobacteria; Actinobacteria; Rubrobacteridae; Rubrobacterales; Rubrobacterineae; Rubrobacteraceae; Conexibacter  
3932 2 Root; Bacteria; TM7; TM7\_genera\_incertae\_sedis  
3981 2 Root; Bacteria; Firmicutes; "Bacilli"; Bacillales; "Paenibacillaceae"; "Paenibacillaceae 1"; Paenibacillus  
4082 2 Root; Bacteria; Bacteroidetes  
4103 2 Root; Bacteria; Firmicutes; "Bacilli"; "Lactobacillales"  
4612 2 Root; Bacteria; Actinobacteria; Actinobacteria; Actinobacteridae; Actinomycetales  
5318 2 Root; Bacteria; Firmicutes; "Clostridia"; Clostridiales; Veillonellaceae; Veillonella  
5 1 Root; Bacteria; Bacteroidetes; Bacteroidetes; Bacteroidales; Prevotellaceae; Prevotella  
26 1 Root; Bacteria; Actinobacteria; Actinobacteria; Actinobacteridae; Actinomycetales; Actinomycineae; Actinomycetaceae; Actinomyces  
60 1 Root; Bacteria; Fusobacteria; Fusobacteria; Fusobacteriales; Fusobacteriaceae  
62 1 Root; Bacteria; Firmicutes; "Bacilli"; "Lactobacillales"; Streptococcaceae; Streptococcus  
92 1 Root; Bacteria; Firmicutes; "Bacilli"; "Lactobacillales"; Streptococcaceae; Streptococcus  
105 1 Root; Bacteria; Firmicutes; "Bacilli"; "Lactobacillales"; "Carnobacteriaceae"; "Carnobacteriaceae 2"; Granulicatella  
114 1 Root; Bacteria; Firmicutes; "Bacilli"; "Lactobacillales"; Streptococcaceae  
117 1 Root; Bacteria; Bacteroidetes; Bacteroidetes; Bacteroidales; Porphyromonadaceae; Dysgonomonas  
135 1 Root; Bacteria; Bacteroidetes; Bacteroidetes; Bacteroidales; Prevotellaceae; Prevotella  
144 1 Root; Bacteria; Bacteroidetes; Bacteroidetes; Bacteroidales; Prevotellaceae; Prevotella  
145 1 Root; Bacteria; Bacteroidetes; Bacteroidetes; Bacteroidales; Prevotellaceae; Prevotella  
160 1 Root; Bacteria; Proteobacteria; Epsilonproteobacteria; Campylobacteriales; Campylobacteraceae; Campylobacter  
167 1 Root; Bacteria; Firmicutes; "Clostridia"; Clostridiales  
168 1 Root; Bacteria; Firmicutes  
188 1 Root; Bacteria; Fusobacteria; Fusobacteria; Fusobacteriales; Fusobacteriaceae; Leptotrichia  
190 1 Root; Bacteria; Firmicutes; "Bacilli"; "Lactobacillales"; Streptococcaceae; Streptococcus  
192 1 Root; Bacteria; Fusobacteria; Fusobacteria; Fusobacteriales; Fusobacteriaceae; Fusobacterium  
207 1 Root; Bacteria; Fusobacteria; Fusobacteria; Fusobacteriales; Fusobacteriaceae; Fusobacterium  
255 1 Root; Bacteria  
280 1 Root; Bacteria; Actinobacteria; Actinobacteria; Actinobacteridae; Actinomycetales; Frankineae; Kineosporiaceae; Kineococcus  
297 1 Root; Bacteria; Firmicutes; "Clostridia"; Clostridiales; Veillonellaceae; Veillonella  
336 1 Root; Bacteria; Actinobacteria; Actinobacteria; Actinobacteridae; Actinomycetales; Micrococcineae; Micrococcaceae; Rothia  
337 1 Root; Bacteria; Actinobacteria; Actinobacteria; Actinobacteridae; Actinomycetales; Actinomycineae; Actinomycetaceae  
350 1 Root; Bacteria; Firmicutes  
360 1 Root; Bacteria; Actinobacteria; Actinobacteria; Actinobacteridae; Actinomycetales; Micrococcineae; Micrococcaceae; Rothia  
362 1 Root; Bacteria; Bacteroidetes; Bacteroidetes; Bacteroidales; Prevotellaceae  
371 1 Root; Bacteria; Firmicutes; "Bacilli"  
387 1 Root; Bacteria; Firmicutes; "Bacilli"  
395 1 Root; Bacteria; Firmicutes; "Bacilli"; Bacillales; Bacillaceae; "Bacillaceae 1"; Bacillus; Bacillus c  
404 1 Root; Bacteria; Firmicutes; "Clostridia"; Clostridiales; "Lachnospiraceae"; Oribacterium  
406 1 Root; Bacteria; Firmicutes; "Clostridia"; Clostridiales; Veillonellaceae; Centipeda  
409 1 Root; Bacteria; Proteobacteria; Gammaproteobacteria; Pasteurellales; Pasteurellaceae  
412 1 Root; Bacteria; Bacteroidetes; Bacteroidetes; Bacteroidales; Prevotellaceae; Prevotella  
429 1 Root; Bacteria; Bacteroidetes; Bacteroidetes; Bacteroidales; Porphyromonadaceae; Porphyromonas  
434 1 Root; Bacteria; Bacteroidetes; Bacteroidetes; Bacteroidales; Prevotellaceae; Prevotella  
436 1 Root; Bacteria; Actinobacteria; Actinobacteria; Actinobacteridae; Actinomycetales  
440 1 Root; Bacteria; Proteobacteria; Gammaproteobacteria; Enterobacteriales; Enterobacteriaceae; Escherichia  
457 1 Root; Bacteria; Bacteroidetes; Bacteroidetes; Bacteroidales; Prevotellaceae; Prevotella  
485 1 Root; Bacteria; Proteobacteria; Betaproteobacteria; Neisseriales; Neisseriaceae  
521 1 Root; Bacteria; Bacteroidetes; Bacteroidetes; Bacteroidales; Prevotellaceae; Prevotella  
540 1 Root; Bacteria; Bacteroidetes; Bacteroidetes; Bacteroidales; Rikenellaceae; Alistipes  
542 1 Root; Bacteria; Fusobacteria; Fusobacteria; Fusobacteriales

581 1 Root; Bacteria; Cyanobacteria; Cyanobacteria  
598 1 Root; Bacteria; Fusobacteria; Fusobacteria; Fusobacteriales; Fusobacteriaceae  
614 1 Root; Bacteria; Firmicutes; "Bacilli"; "Lactobacillales"; Streptococcaceae  
676 1 Root; Bacteria; TM7; TM7\_genera\_incertae\_sedis  
680 1 Root; Bacteria; Bacteroidetes; Bacteroidetes; Bacteroidales; Porphyromonadaceae; Porphyromonas  
687 1 Root; Bacteria; Firmicutes; "Bacilli"; "Lactobacillales"  
694 1 Root; Bacteria; Actinobacteria; Actinobacteria; Actinobacteridae; Actinomycetales; Micrococcineae; Micrococcaceae; Rothia  
710 1 Root; Bacteria; Firmicutes; "Clostridia"; Clostridiales  
716 1 Root; Bacteria; Firmicutes; "Clostridia"; Clostridiales  
757 1 Root; Bacteria; Fusobacteria; Fusobacteria; Fusobacteriales; Fusobacteriaceae; Fusobacterium  
770 1 Root; Bacteria; Proteobacteria; Betaproteobacteria; Burkholderiales; Alcaligenaceae; Sutterella  
781 1 Root; Bacteria; Bacteroidetes; Bacteroidetes; Bacteroidales; Prevotellaceae; Prevotella  
803 1 Root; Bacteria; Fusobacteria; Fusobacteria; Fusobacteriales; Fusobacteriaceae; Fusobacterium  
808 1 Root; Bacteria; Spirochaetes; Spirochaetes; Spirochaetales; Spirochaetaceae; Treponema  
820 1 Root; Bacteria; Bacteroidetes; Bacteroidetes; Bacteroidales; Prevotellaceae; Prevotella  
864 1 Root; Bacteria; Actinobacteria; Actinobacteria; Actinobacteridae; Actinomycetales; Actinomycineae; Actinomycetaceae; Actinomyces  
871 1 Root; Bacteria; Firmicutes; "Bacilli"; "Lactobacillales"; Streptococcaceae; Streptococcus  
872 1 Root; Bacteria  
889 1 Root; Bacteria; Bacteroidetes; Bacteroidetes; Bacteroidales; Prevotellaceae; Xylanibacter  
894 1 Root; Bacteria; Firmicutes; "Bacilli"; "Lactobacillales"; Streptococcaceae; Streptococcus  
904 1 Root; Bacteria; TM7; TM7\_genera\_incertae\_sedis  
916 1 Root; Bacteria; Proteobacteria; Gammaproteobacteria; Oceanospirillales; Halomonadaceae; Carnimonas  
919 1 Root; Bacteria; Bacteroidetes; Bacteroidetes; Bacteroidales; Prevotellaceae; Prevotella  
929 1 Root; Bacteria; Firmicutes; "Bacilli"; "Lactobacillales"; Streptococcaceae; Streptococcus  
955 1 Root; Bacteria; Proteobacteria; Betaproteobacteria; Burkholderiales; Comamonadaceae  
975 1 Root; Bacteria; Bacteroidetes; Bacteroidetes; Bacteroidales; Prevotellaceae; Prevotella  
985 1 Root; Bacteria; Bacteroidetes; Bacteroidetes; Bacteroidales; Bacteroidaceae; Pontibacter  
987 1 Root; Bacteria; Bacteroidetes; Bacteroidetes; Bacteroidales; Porphyromonadaceae; Porphyromonas  
1000 1 Root; Bacteria; Proteobacteria; Epsilonproteobacteria; Campylobacteriales; Campylobacteraceae; Campylobacter  
1012 1 Root; Bacteria; Bacteroidetes; Bacteroidetes; Bacteroidales; Bacteroidaceae; Bacteroides  
1026 1 Root; Bacteria; Firmicutes; "Bacilli"  
1030 1 Root; Bacteria; Actinobacteria; Actinobacteria; Coriobacteridae; Coriobacteriales; Coriobacterineae; Coriobacteriaceae; Atopobium  
1051 1 Root; Bacteria; Firmicutes; "Clostridia"; Clostridiales; Clostridiaceae; "Clostridiaceae 1"; Clostridium  
1064 1 Root; Bacteria; Fusobacteria; Fusobacteria; Fusobacteriales; Fusobacteriaceae; Fusobacterium  
1069 1 Root; Bacteria; Bacteroidetes; Bacteroidetes; Bacteroidales; Prevotellaceae; Prevotella  
1072 1 Root; Bacteria; Firmicutes; "Clostridia"; Clostridiales  
1074 1 Root; Bacteria; Proteobacteria; Gammaproteobacteria; Pasteurellales; Pasteurellaceae  
1093 1 Root; Bacteria; TM7; TM7\_genera\_incertae\_sedis  
1120 1 Root; Bacteria; Proteobacteria; Betaproteobacteria; Neisseriales; Neisseriaceae; Neisseria  
1122 1 Root; Bacteria; Bacteroidetes  
1153 1 Root; Bacteria; Proteobacteria; Deltaproteobacteria; Syntrophobacteriales; Syntrophaceae; Smithella  
1159 1 Root; Bacteria; Firmicutes; "Clostridia"; Clostridiales; Veillonellaceae; Veillonella  
1202 1 Root; Bacteria; Firmicutes; "Bacilli"; "Lactobacillales"; Streptococcaceae; Streptococcus  
1205 1 Root; Bacteria; Proteobacteria; Gammaproteobacteria; Pasteurellales; Pasteurellaceae  
1217 1 Root; Bacteria; Firmicutes  
1248 1 Root; Bacteria  
1275 1 Root; Bacteria; Firmicutes; "Clostridia"; Clostridiales; Veillonellaceae; Selenomonas  
1290 1 Root; Bacteria; Proteobacteria; Alphaproteobacteria  
1292 1 Root; Bacteria; Bacteroidetes; Flavobacteria; Flavobacteriales; Flavobacteriaceae; Capnocytophaga

1294 1 Root; Bacteria; Firmicutes; "Clostridia"; Clostridiales; Veillonellaceae; Veillonella  
1302 1 Root; Bacteria; Firmicutes; "Bacilli"; "Lactobacillales"; Streptococcaceae; Streptococcus  
1339 1 Root; Bacteria; Proteobacteria; Epsilonproteobacteria; Campylobacteriales; Campylobacteraceae; Campylobacter  
1346 1 Root; Bacteria; Gemmatimonadetes; Gemmatimonadetes; Gemmatimonadales; Gemmatimonadaceae; Gemmatimonas  
1360 1 Root; Bacteria; Bacteroidetes; Bacteroidetes; Bacteroidales; Prevotellaceae; Prevotella  
1384 1 Root; Bacteria; Firmicutes; "Clostridia"; Clostridiales; "Lachnospiraceae"  
1401 1 Root; Bacteria; Fusobacteria; Fusobacteria; Fusobacteriales; Fusobacteriaceae; Sebaldeia  
1404 1 Root; Bacteria; Firmicutes; "Bacilli"; Bacillales; "Paenibacillaceae"; "Paenibacillaceae 1"; Paenibacillus  
1440 1 Root; Bacteria; Bacteroidetes; Flavobacteria; Flavobacteriales; Flavobacteriaceae; Flavobacterium  
1447 1 Root; Bacteria; Firmicutes; "Clostridia"; Clostridiales; Veillonellaceae; Selenomonas  
1469 1 Root; Bacteria; Firmicutes; "Bacilli"; "Lactobacillales"; Streptococcaceae; Streptococcus  
1490 1 Root; Bacteria; Bacteroidetes; Sphingobacteria; Sphingobacteriales; Flexibacteraceae; Leadbetterella  
1492 1 Root; Bacteria; Firmicutes; "Bacilli"; Bacillales  
1508 1 Root; Bacteria; Bacteroidetes; Bacteroidetes; Bacteroidales  
1561 1 Root; Bacteria; Actinobacteria; Actinobacteria; Coriobacteridae; Coriobacteriales; Coriobacterineae; Coriobacteriaceae; Atopobium  
1571 1 Root; Bacteria; Firmicutes; "Clostridia"; Clostridiales; "Lachnospiraceae"; Oribacterium  
1577 1 Root; Bacteria; Bacteroidetes; Sphingobacteria; Sphingobacteriales; Flexibacteraceae; Spirosoma  
1587 1 Root; Bacteria; Firmicutes; "Bacilli"; "Lactobacillales"; "Carnobacteriaceae"; "Carnobacteriaceae 2"; Granulicatella  
1588 1 Root; Bacteria; Actinobacteria; Actinobacteria; Actinobacteridae; Actinomycetales; Corynebacterineae; Corynebacteriaceae; Corynebacterium  
1632 1 Root; Bacteria; Proteobacteria; Gammaproteobacteria; Oceanospirillales  
1657 1 Root; Bacteria; Firmicutes; "Clostridia"; Clostridiales; Veillonellaceae; Veillonella  
1663 1 Root; Bacteria; Actinobacteria; Actinobacteria; Coriobacteridae; Coriobacteriales; Coriobacterineae; Coriobacteriaceae; Olsenella  
1707 1 Root; Bacteria; Actinobacteria; Actinobacteria; Actinobacteridae; Actinomycetales; Actinomycineae; Actinomycetaceae; Actinomyces  
1727 1 Root; Bacteria; Firmicutes; "Clostridia"; Clostridiales; Veillonellaceae; Veillonella  
1743 1 Root; Bacteria; Bacteroidetes  
1761 1 Root; Bacteria; Firmicutes; "Clostridia"; Clostridiales; Veillonellaceae; Veillonella  
1767 1 Root; Bacteria; Firmicutes  
1816 1 Root; Bacteria; Firmicutes; "Bacilli"; "Lactobacillales"  
1824 1 Root; Bacteria; Firmicutes; "Clostridia"; Clostridiales; Veillonellaceae; Veillonella  
1835 1 Root; Bacteria; Proteobacteria; Epsilonproteobacteria; Campylobacteriales; Campylobacteraceae; Campylobacter  
1843 1 Root; Bacteria; Actinobacteria; Actinobacteria; Actinobacteridae; Actinomycetales; Micrococcineae; Micrococcaceae; Rothia  
1881 1 Root; Bacteria; Actinobacteria; Actinobacteria; Actinobacteridae; Actinomycetales; Actinomycineae; Actinomycetaceae; Actinomyces  
1901 1 Root; Bacteria  
1904 1 Root; Bacteria; Firmicutes; "Bacilli"; "Lactobacillales"  
1926 1 Root; Bacteria; Spirochaetes; Spirochaetes; Spirochaetales; Spirochaetaceae; Treponema  
1932 1 Root; Bacteria; Bacteroidetes; Bacteroidetes; Bacteroidales; Prevotellaceae; Prevotella  
1953 1 Root; Bacteria; Firmicutes; "Clostridia"; Clostridiales; Veillonellaceae; Veillonella  
2004 1 Root; Bacteria; Firmicutes; "Clostridia"; Clostridiales; "Lachnospiraceae"; Oribacterium  
2024 1 Root; Bacteria; Firmicutes; "Clostridia"; Clostridiales; Veillonellaceae; Veillonella  
2049 1 Root; Bacteria; Firmicutes; "Clostridia"; Clostridiales; Veillonellaceae; Veillonella  
2063 1 Root; Bacteria; Firmicutes; "Clostridia"; Clostridiales; Veillonellaceae; Veillonella  
2099 1 Root; Bacteria; Firmicutes; "Bacilli"; "Lactobacillales"; Streptococcaceae; Streptococcus  
2117 1 Root; Bacteria; TM7; TM7\_genera\_incertae\_sedis  
2120 1 Root; Bacteria; Bacteroidetes; Bacteroidetes; Bacteroidales  
2121 1 Root; Bacteria; Bacteroidetes; Bacteroidetes; Bacteroidales; Prevotellaceae; Prevotella  
2133 1 Root; Bacteria; Firmicutes; "Bacilli"; "Lactobacillales"; Streptococcaceae  
2174 1 Root; Bacteria  
2198 1 Root; Bacteria; Firmicutes; "Clostridia"; Clostridiales; "Peptostreptococcaceae"; Peptostreptococcus  
2201 1 Root; Bacteria; Fusobacteria; Fusobacteria; Fusobacteriales; Fusobacteriaceae; Fusobacterium

2235 1 Root; Bacteria; Firmicutes; "Bacilli"; "Lactobacillales"; Streptococcaceae; Streptococcus  
 2237 1 Root; Bacteria; Bacteroidetes; Bacteroidetes; Bacteroidales; Porphyromonadaceae; Porphyromonas  
 2240 1 Root; Bacteria; Firmicutes; "Bacilli"; "Lactobacillales"; "Carnobacteriaceae"; "Carnobacteriaceae 2"; Granulicatella  
 2251 1 Root; Bacteria; Actinobacteria; Actinobacteria; Actinobacteridae; Actinomycetales; Propionibacterineae; Nocardiodaceae; Nocardioides  
 2261 1 Root; Bacteria; Proteobacteria; Alphaproteobacteria; Rhizobiales  
 2270 1 Root; Bacteria; Deinococcus-Thermus; Deinococci; Deinococcales; Deinococcaceae; Deinococcus  
 2280 1 Root; Bacteria; Bacteroidetes; Bacteroidetes; Bacteroidales; Prevotellaceae  
 2281 1 Root; Bacteria; Bacteroidetes; Bacteroidetes; Bacteroidales; Prevotellaceae; Xylanibacter  
 2283 1 Root; Bacteria; Firmicutes; "Clostridia"; Clostridiales; Incertae Sedis XI; Parvimonas  
 2284 1 Root; Bacteria; Bacteroidetes; Bacteroidetes; Bacteroidales; Prevotellaceae; Prevotella  
 2286 1 Root; Bacteria; Firmicutes; "Clostridia"; Clostridiales; Veillonellaceae; Megasphaera  
 2287 1 Root; Bacteria; Firmicutes; "Clostridia"; Clostridiales; Veillonellaceae; Veillonella  
 2292 1 Root; Bacteria; Firmicutes; "Bacilli"; "Lactobacillales"; Streptococcaceae; Streptococcus  
 2350 1 Root; Bacteria; Firmicutes; "Bacilli"; "Lactobacillales"; Streptococcaceae; Streptococcus  
 2373 1 Root; Bacteria; Proteobacteria; Gammaproteobacteria; Pasteurellales; Pasteurellaceae; Phocoenobacter  
 2379 1 Root; Bacteria; Actinobacteria; Actinobacteria; Actinobacteridae; Actinomycetales; Micrococcineae; Micrococcaceae; Rothia  
 2389 1 Root; Bacteria; Proteobacteria; Gammaproteobacteria; Pasteurellales; Pasteurellaceae  
 2394 1 Root; Bacteria; Firmicutes; "Bacilli"; "Lactobacillales"; Streptococcaceae; Streptococcus  
 2425 1 Root; Bacteria; Firmicutes; "Bacilli"; "Lactobacillales"; Streptococcaceae; Streptococcus  
 2436 1 Root; Bacteria; Bacteroidetes; Bacteroidetes; Bacteroidales; Prevotellaceae  
 2443 1 Root; Bacteria; Actinobacteria; Actinobacteria; Coriobacteridae; Coriobacteriales; Coriobacterineae; Coriobacteriaceae; Atopobium  
 2504 1 Root; Bacteria; Bacteroidetes; Bacteroidetes; Bacteroidales; Prevotellaceae  
 2505 1 Root; Bacteria; TM7; TM7\_genera\_incertae\_sedis  
 2515 1 Root; Bacteria; Bacteroidetes; Bacteroidetes; Bacteroidales; Porphyromonadaceae; Porphyromonas  
 2531 1 Root; Bacteria; Proteobacteria; Deltaproteobacteria; Myxococcales; Sorangineae; Polyangiaceae; Sorangium  
 2537 1 Root; Bacteria; Proteobacteria; Alphaproteobacteria; Caulobacterales; Caulobacteraceae  
 2606 1 Root; Bacteria; Firmicutes; "Clostridia"; Clostridiales; "Lachnospiraceae"  
 2607 1 Root; Bacteria; Firmicutes; "Clostridia"; Clostridiales; Veillonellaceae; Veillonella  
 2613 1 Root; Bacteria; Firmicutes; "Clostridia"; Clostridiales  
 2635 1 Root; Bacteria; Firmicutes; "Bacilli"; Bacillales; "Paenibacillaceae"; "Paenibacillaceae 1"; Paenibacillus  
 2668 1 Root; Bacteria; Bacteroidetes; Bacteroidetes; Bacteroidales; Prevotellaceae; Prevotella  
 2710 1 Root; Bacteria; Actinobacteria; Actinobacteria; Actinobacteridae; Actinomycetales; Actinomycineae; Actinomycetaceae; Actinomyces  
 2719 1 Root; Bacteria; Fusobacteria; Fusobacteria; Fusobacteriales; Fusobacteriaceae; Fusobacterium  
 2739 1 Root; Bacteria; Firmicutes; "Clostridia"; Clostridiales; Veillonellaceae; Centipeda  
 2744 1 Root; Bacteria; Proteobacteria; Gammaproteobacteria; Pasteurellales; Pasteurellaceae  
 2767 1 Root; Bacteria; Firmicutes; "Bacilli"; "Lactobacillales"; Streptococcaceae; Streptococcus  
 2780 1 Root; Bacteria; Bacteroidetes; Bacteroidetes; Bacteroidales; Prevotellaceae; Prevotella  
 2791 1 Root; Bacteria; Actinobacteria; Actinobacteria; Actinobacteridae; Actinomycetales; Actinomycineae; Actinomycetaceae; Actinomyces  
 2798 1 Root; Bacteria; Fusobacteria; Fusobacteria; Fusobacteriales; Fusobacteriaceae; Fusobacterium  
 2839 1 Root; Bacteria; Firmicutes; "Clostridia"; Clostridiales; "Peptostreptococcaceae"; "Peptostreptococcaceae Incertae Sedis"  
 2840 1 Root; Bacteria; Fusobacteria; Fusobacteria; Fusobacteriales; Fusobacteriaceae; Fusobacterium  
 2855 1 Root; Bacteria; Bacteroidetes; Bacteroidetes; Bacteroidales; Prevotellaceae; Prevotella  
 2857 1 Root; Bacteria; Fusobacteria; Fusobacteria; Fusobacteriales; Fusobacteriaceae; Fusobacterium  
 2870 1 Root; Bacteria; Actinobacteria; Actinobacteria; Actinobacteridae; Actinomycetales; Micrococcineae  
 2874 1 Root; Bacteria; Firmicutes; "Bacilli"; "Lactobacillales"; Streptococcaceae; Streptococcus  
 2881 1 Root; Bacteria; Firmicutes; "Bacilli"; "Lactobacillales"; "Carnobacteriaceae"; "Carnobacteriaceae 2"; Granulicatella  
 2892 1 Root; Bacteria; Bacteroidetes; Bacteroidetes; Bacteroidales; Prevotellaceae; Prevotella  
 2893 1 Root; Bacteria; Firmicutes  
 2942 1 Root; Bacteria; Firmicutes; "Clostridia"; Clostridiales

2976 1 Root; Bacteria; Firmicutes; "Bacilli"; "Lactobacillales"; Streptococcaceae; Streptococcus  
 2980 1 Root; Bacteria; Firmicutes; "Bacilli"; "Lactobacillales"; Streptococcaceae; Streptococcus  
 2991 1 Root; Bacteria; Bacteroidetes; Flavobacteria; Flavobacteriales; Flavobacteriaceae  
 3022 1 Root; Bacteria; Firmicutes; "Clostridia"; Clostridiales; Veillonellaceae; Veillonella  
 3038 1 Root; Bacteria; Firmicutes; "Clostridia"; Clostridiales  
 3054 1 Root; Bacteria; Bacteroidetes; Bacteroidetes; Bacteroidales; Porphyromonadaceae  
 3059 1 Root; Bacteria; Firmicutes; "Bacilli"; "Lactobacillales"; Lactobacillaceae; Lactobacillus  
 3071 1 Root; Bacteria; Firmicutes; "Clostridia"; Clostridiales  
 3072 1 Root; Bacteria; Bacteroidetes; Bacteroidetes; Bacteroidales; Prevotellaceae; Prevotella  
 3096 1 Root; Bacteria; Firmicutes; "Clostridia"; Clostridiales; Veillonellaceae; Veillonella  
 3098 1 Root; Bacteria; Bacteroidetes; Flavobacteria; Flavobacteriales; Flavobacteriaceae; Capnocytophaga  
 3114 1 Root; Bacteria; Actinobacteria; Actinobacteria; Actinobacteridae; Actinomycetales; Actinomycineae; Actinomycetaceae; Actinomyces  
 3121 1 Root; Bacteria; Firmicutes; "Clostridia"; Clostridiales; Veillonellaceae; Veillonella  
 3123 1 Root; Bacteria; Firmicutes; "Clostridia"; Clostridiales  
 3146 1 Root; Bacteria; Proteobacteria; Alphaproteobacteria; Rhizobiales; Rhizobiaceae  
 3147 1 Root; Bacteria; Proteobacteria; Gammaproteobacteria; Pasteurellales; Pasteurellaceae  
 3152 1 Root; Bacteria; Firmicutes; "Clostridia"; Clostridiales  
 3157 1 Root; Bacteria; Bacteroidetes; Bacteroidetes; Bacteroidales  
 3162 1 Root; Bacteria; Firmicutes; "Clostridia"; Clostridiales; "Lachnospiraceae"; Oribacterium  
 3167 1 Root; Bacteria; Firmicutes; "Clostridia"; Clostridiales; Veillonellaceae; Veillonella  
 3193 1 Root; Bacteria; Actinobacteria; Actinobacteria; Actinobacteridae; Actinomycetales; Micrococcineae; Microbacteriaceae  
 3231 1 Root; Bacteria; Firmicutes; "Bacilli"  
 3232 1 Root; Bacteria; Firmicutes; "Bacilli"; "Lactobacillales"; Streptococcaceae; Streptococcus  
 3249 1 Root; Bacteria; Bacteroidetes; Bacteroidetes; Bacteroidales; Prevotellaceae; Prevotella  
 3273 1 Root; Bacteria; Bacteroidetes; Sphingobacteria; Sphingobacteriales; Flexibacteraceae  
 3317 1 Root; Bacteria; Firmicutes  
 3321 1 Root; Bacteria; Bacteroidetes; Bacteroidetes; Bacteroidales  
 3356 1 Root; Bacteria; Firmicutes; "Clostridia"; Clostridiales; Veillonellaceae; Veillonella  
 3365 1 Root; Bacteria; Bacteroidetes; Bacteroidetes; Bacteroidales; Prevotellaceae; Prevotella  
 3368 1 Root; Bacteria; Firmicutes; "Bacilli"; "Lactobacillales"; Streptococcaceae; Streptococcus  
 3385 1 Root; Bacteria; Firmicutes; "Clostridia"; Clostridiales; "Ruminococcaceae"; Faecalibacterium  
 3392 1 Root; Bacteria; Bacteroidetes; Bacteroidetes; Bacteroidales; Prevotellaceae; Prevotella  
 3427 1 Root; Bacteria; Proteobacteria; Betaproteobacteria; Burkholderiales; Incertae sedis 5  
 3444 1 Root; Bacteria; Bacteroidetes; Bacteroidetes; Bacteroidales; Prevotellaceae  
 3446 1 Root; Bacteria; Proteobacteria; Betaproteobacteria; Burkholderiales  
 3450 1 Root; Bacteria; Bacteroidetes; Bacteroidetes; Bacteroidales  
 3466 1 Root; Bacteria; Proteobacteria; Alphaproteobacteria; Sphingomonadales; Sphingomonadaceae; Porphyrobacter  
 3471 1 Root; Bacteria; Proteobacteria; Gammaproteobacteria; Pseudomonadales; Moraxellaceae; Acinetobacter  
 3496 1 Root; Bacteria; Firmicutes; "Bacilli"; "Lactobacillales"; Streptococcaceae; Streptococcus  
 3520 1 Root; Bacteria; Firmicutes; "Bacilli"; "Lactobacillales"; Streptococcaceae; Streptococcus  
 3544 1 Root; Bacteria; Proteobacteria; Gammaproteobacteria; Xanthomonadales; Xanthomonadaceae; Thermomonas  
 3549 1 Root; Bacteria; Fusobacteria; Fusobacteria; Fusobacteriales; Fusobacteriaceae  
 3554 1 Root; Bacteria; Firmicutes; "Clostridia"; Clostridiales  
 3607 1 Root; Bacteria; Actinobacteria; Actinobacteria; Actinobacteridae; Actinomycetales; Actinomycineae; Actinomycetaceae; Actinomyces  
 3613 1 Root; Bacteria; Actinobacteria; Actinobacteria; Actinobacteridae; Actinomycetales; Actinomycineae; Actinomycetaceae; Actinomyces  
 3639 1 Root; Bacteria; Fusobacteria; Fusobacteria; Fusobacteriales; Fusobacteriaceae; Leptotrichia  
 3672 1 Root; Bacteria; Firmicutes; "Bacilli"; "Lactobacillales"; Streptococcaceae; Streptococcus  
 3681 1 Root; Bacteria; Firmicutes; "Clostridia"; Clostridiales  
 3704 1 Root; Bacteria; Bacteroidetes; Bacteroidetes; Bacteroidales; Prevotellaceae

3706 1 Root; Bacteria; Bacteroidetes; Bacteroidetes; Bacteroidales; Prevotellaceae; Prevotella  
3718 1 Root; Bacteria; Proteobacteria; Deltaproteobacteria  
3721 1 Root; Bacteria; Firmicutes; "Bacilli"; "Lactobacillales"; Streptococcaceae; Streptococcus  
3724 1 Root; Bacteria; Firmicutes; "Clostridia"; Clostridiales; Veillonellaceae; Veillonella  
3743 1 Root; Bacteria; Firmicutes; "Bacilli"; "Lactobacillales"; Streptococcaceae; Streptococcus  
3750 1 Root; Bacteria; Bacteroidetes; Flavobacteria; Flavobacteriales; Flavobacteriaceae  
3759 1 Root; Bacteria; Proteobacteria; Betaproteobacteria; Burkholderiales; Incertae sedis 5  
3762 1 Root; Bacteria; Firmicutes; "Bacilli"; "Lactobacillales"; Lactobacillaceae; Lactobacillus  
3765 1 Root; Bacteria; Firmicutes; "Bacilli"  
3772 1 Root; Bacteria  
3799 1 Root; Bacteria; Firmicutes; "Erysipelotrichi"; "Erysipelotrichales"; Erysipelotrichaceae; Bulleidia  
3819 1 Root; Bacteria; Firmicutes; "Clostridia"; Clostridiales; Veillonellaceae; Veillonella  
3826 1 Root; Bacteria; Bacteroidetes; Flavobacteria; Flavobacteriales; Flavobacteriaceae  
3845 1 Root; Bacteria; Bacteroidetes; Bacteroidetes; Bacteroidales  
3851 1 Root; Bacteria; Firmicutes; "Clostridia"; Clostridiales; Veillonellaceae; Veillonella  
3861 1 Root; Bacteria; Actinobacteria; Actinobacteria; Actinobacteridae; Actinomycetales; Micrococcineae; Intrasporengiaceae; Knoellia  
3879 1 Root; Bacteria; Firmicutes; "Clostridia"; Clostridiales; Veillonellaceae; Veillonella  
3882 1 Root; Bacteria; Bacteroidetes  
3906 1 Root; Bacteria; Firmicutes; "Clostridia"; Clostridiales; Veillonellaceae; Veillonella  
3907 1 Root; Bacteria; Bacteroidetes; Bacteroidetes; Bacteroidales; Porphyromonadaceae; Porphyromonas  
3914 1 Root; Bacteria; Fusobacteria; Fusobacteria; Fusobacteriales; Fusobacteriaceae; Fusobacterium  
3950 1 Root; Bacteria; Firmicutes; "Clostridia"; Clostridiales; Veillonellaceae; Centipeda  
3967 1 Root; Bacteria; Firmicutes; "Clostridia"; Clostridiales; "Lachnospiraceae"  
3971 1 Root; Bacteria; Firmicutes; "Clostridia"; Clostridiales; Veillonellaceae; Veillonella  
3972 1 Root; Bacteria; Firmicutes; "Bacilli"; "Lactobacillales"; Streptococcaceae; Streptococcus  
3982 1 Root; Bacteria; Actinobacteria; Actinobacteria; Actinobacteridae; Actinomycetales  
4009 1 Root; Bacteria; Bacteroidetes; Flavobacteria; Flavobacteriales  
4010 1 Root; Bacteria  
4036 1 Root; Bacteria; Bacteroidetes; Bacteroidetes; Bacteroidales; Prevotellaceae; Prevotella  
4145 1 Root; Bacteria; Actinobacteria; Actinobacteria; Actinobacteridae; Actinomycetales; Micrococcineae; Micrococcaceae; Rothia  
4156 1 Root; Bacteria; Actinobacteria; Actinobacteria; Actinobacteridae; Actinomycetales; Micrococcineae; Micrococcaceae; Rothia  
4164 1 Root; Bacteria; Firmicutes; "Clostridia"; Clostridiales; Veillonellaceae; Veillonella  
4166 1 Root; Bacteria; Bacteroidetes; Bacteroidetes; Bacteroidales; Porphyromonadaceae; Porphyromonas  
4172 1 Root; Bacteria; Firmicutes; "Bacilli"; "Lactobacillales"; "Carnobacteriaceae"; "Carnobacteriaceae 2"; Granulicatella  
4241 1 Root; Bacteria; Firmicutes; "Bacilli"; "Lactobacillales"; Streptococcaceae; Streptococcus  
4242 1 Root; Bacteria; Firmicutes; "Bacilli"; "Lactobacillales"; Streptococcaceae; Streptococcus  
4267 1 Root; Bacteria; Bacteroidetes; Bacteroidetes; Bacteroidales  
4277 1 Root; Bacteria; Bacteroidetes; Bacteroidetes; Bacteroidales; Prevotellaceae; Prevotella  
4281 1 Root; Bacteria; Firmicutes; "Clostridia"; Clostridiales; "Lachnospiraceae"; Catonella  
4296 1 Root; Bacteria; Firmicutes; "Clostridia"; Clostridiales; Veillonellaceae; Veillonella  
4323 1 Root; Bacteria; Bacteroidetes; Bacteroidetes; Bacteroidales; Prevotellaceae  
4324 1 Root; Bacteria; Bacteroidetes; Bacteroidetes; Bacteroidales; Porphyromonadaceae; Porphyromonas  
4352 1 Root; Bacteria; Firmicutes; "Bacilli"; "Lactobacillales"; Streptococcaceae  
4364 1 Root; Bacteria; Fusobacteria; Fusobacteria; Fusobacteriales; Fusobacteriaceae  
4396 1 Root; Bacteria; Actinobacteria; Actinobacteria; Actinobacteridae; Actinomycetales; Micrococcineae; Micrococcaceae; Rothia  
4406 1 Root; Bacteria; Proteobacteria; Epsilonproteobacteria; Campylobacteriales; Campylobacteraceae; Campylobacter  
4417 1 Root; Bacteria; Firmicutes; "Clostridia"; Clostridiales; Veillonellaceae; Selenomonas  
4442 1 Root; Bacteria; Firmicutes; "Clostridia"; Clostridiales; Veillonellaceae; Dialister  
4486 1 Root; Bacteria; Bacteroidetes; Bacteroidetes; Bacteroidales; Bacteroidaceae; Bacteroides

4508 1 Root; Bacteria; Bacteroidetes; Bacteroidetes; Bacteroidales; Prevotellaceae; Prevotella  
4513 1 Root; Bacteria; Firmicutes; "Clostridia"; Clostridiales; Veillonellaceae; Veillonella  
4527 1 Root; Bacteria; Actinobacteria; Actinobacteria; Actinobacteridae; Actinomycetales; Streptosporangineae; Nocardioseae; Nocardiosepsis  
4536 1 Root; Bacteria; Firmicutes; "Bacilli"; Bacillales; Bacillaceae; "Bacillaceae 2"; Oceanobacillus  
4549 1 Root; Bacteria; Proteobacteria; Betaproteobacteria; Neisseriales; Neisseriaceae; Urobacterium  
4572 1 Root; Bacteria; Firmicutes; "Clostridia"; Clostridiales; Veillonellaceae; Veillonella  
4600 1 Root; Bacteria; Bacteroidetes; Bacteroidetes; Bacteroidales; Prevotellaceae; Prevotella  
4625 1 Root; Bacteria; Firmicutes; "Clostridia"; Clostridiales; Veillonellaceae; Veillonella  
4674 1 Root; Bacteria; Firmicutes; "Clostridia"; Clostridiales; Veillonellaceae; Selenomonas  
4687 1 Root; Bacteria; Proteobacteria; Betaproteobacteria; Neisseriales; Neisseriaceae  
4698 1 Root; Bacteria; Spirochaetes; Spirochaetes; Spirochaetales; Spirochaetaceae; Treponema  
4712 1 Root; Bacteria; Firmicutes; "Clostridia"; Clostridiales; Veillonellaceae; Veillonella  
4717 1 Root; Bacteria; Actinobacteria; Actinobacteria; Actinobacteridae; Actinomycetales; Micrococcineae; Micrococcaceae; Rothia  
4721 1 Root; Bacteria; Firmicutes; "Bacilli"; "Lactobacillales"; Streptococcaceae; Streptococcus  
4730 1 Root; Bacteria; Firmicutes; "Clostridia"; Clostridiales; "Lachnospiraceae"  
4736 1 Root; Bacteria; Bacteroidetes; Bacteroidetes; Bacteroidales; Prevotellaceae; Prevotella  
4743 1 Root; Bacteria; Firmicutes; "Bacilli"; "Lactobacillales"; "Carnobacteriaceae"; "Carnobacteriaceae 2"; Granulicatella  
4801 1 Root; Bacteria; Firmicutes; "Clostridia"; Clostridiales; "Lachnospiraceae"; Catonella  
4812 1 Root; Bacteria; Proteobacteria; Betaproteobacteria; Neisseriales; Neisseriaceae; Neisseria  
4813 1 Root; Bacteria; Firmicutes; "Clostridia"; Clostridiales; Veillonellaceae; Veillonella  
4830 1 Root; Bacteria; Firmicutes; "Clostridia"; Clostridiales; Veillonellaceae; Megasphaera  
4831 1 Root; Bacteria; Firmicutes; "Clostridia"; Clostridiales; "Lachnospiraceae"  
4854 1 Root; Bacteria; Fusobacteria; Fusobacteria; Fusobacteriales; Fusobacteriaceae; Leptotrichia  
4859 1 Root; Bacteria; Firmicutes; "Clostridia"; Clostridiales; Veillonellaceae; Veillonella  
4860 1 Root; Bacteria; Proteobacteria; Alphaproteobacteria; Rhizobiales; Hyphomicrobiaceae; Devosia  
4863 1 Root; Bacteria; Actinobacteria; Actinobacteria; Coriobacteridae; Coriobacteriales; Coriobacterineae; Coriobacteriaceae; Slackia  
4890 1 Root; Bacteria; Proteobacteria  
4897 1 Root; Bacteria; Firmicutes; "Clostridia"; Clostridiales; Veillonellaceae; Veillonella  
4904 1 Root; Bacteria; Bacteroidetes; Bacteroidetes; Bacteroidales; Prevotellaceae; Prevotella  
4920 1 Root; Bacteria; Proteobacteria; Betaproteobacteria; Neisseriales; Neisseriaceae  
4940 1 Root; Bacteria; Firmicutes; "Bacilli"; "Lactobacillales"; Streptococcaceae  
4943 1 Root; Bacteria; Bacteroidetes; Bacteroidetes; Bacteroidales; Prevotellaceae; Prevotella  
5001 1 Root; Bacteria; Proteobacteria; Gammaproteobacteria; Pasteurellales; Pasteurellaceae; Aggregatibacter  
5018 1 Root; Bacteria; Bacteroidetes; Sphingobacteria; Sphingobacteriales; Sphingobacteriaceae; Sphingobacterium  
5034 1 Root; Bacteria; Firmicutes; "Bacilli"; "Lactobacillales"  
5078 1 Root; Bacteria; Proteobacteria  
5093 1 Root; Bacteria; Bacteroidetes; Bacteroidetes; Bacteroidales; Prevotellaceae; Prevotella  
5118 1 Root; Bacteria; Bacteroidetes; Bacteroidetes; Bacteroidales; Prevotellaceae; Prevotella  
5120 1 Root; Bacteria; Firmicutes; "Bacilli"; "Lactobacillales"; Streptococcaceae; Streptococcus  
5139 1 Root; Bacteria; Firmicutes; "Clostridia"; Clostridiales; Veillonellaceae; Veillonella  
5142 1 Root; Bacteria; Firmicutes; "Bacilli"; "Lactobacillales"; Streptococcaceae; Streptococcus  
5165 1 Root; Bacteria; Firmicutes; "Bacilli"; Bacillales; Bacillaceae; "Bacillaceae 2"; Gracilibacillus  
5180 1 Root; Bacteria; Bacteroidetes; Bacteroidetes; Bacteroidales; Prevotellaceae; Prevotella  
5182 1 Root; Bacteria; Firmicutes; "Clostridia"; Clostridiales; Veillonellaceae; Veillonella  
5266 1 Root; Bacteria; Spirochaetes; Spirochaetes; Spirochaetales; Spirochaetaceae; Treponema  
5305 1 Root; Bacteria; Firmicutes; "Clostridia"; Clostridiales; Veillonellaceae; Veillonella  
5310 1 Root; Bacteria; Firmicutes  
5316 1 Root; Bacteria; Firmicutes; "Clostridia"; Clostridiales; "Peptostreptococcaceae"; Peptostreptococcus  
5322 1 Root; Bacteria; Firmicutes; "Clostridia"; Clostridiales; Veillonellaceae; Veillonella



5328 1 Root; Bacteria; Firmicutes; "Clostridia"; Clostridiales; Veillonellaceae; Centipeda  
5338 1 Root; Bacteria; Proteobacteria; Gammaproteobacteria; Pasteurellales; Pasteurellaceae; Phocoenobacter  
5344 1 Root; Bacteria; Firmicutes; "Clostridia"; Clostridiales  
5351 1 Root; Bacteria; Bacteroidetes; Bacteroidetes; Bacteroidales; Rikenellaceae; Alistipes  
5398 1 Root; Bacteria; Firmicutes; "Bacilli"; Bacillales  
5431 1 Root; Bacteria; Proteobacteria; Gammaproteobacteria; Pasteurellales; Pasteurellaceae  
5440 1 Root; Bacteria; Bacteroidetes; Bacteroidetes; Bacteroidales; Prevotellaceae; Prevotella  
5457 1 Root; Bacteria; Firmicutes  
5476 1 Root; Bacteria; Firmicutes; "Clostridia"; Clostridiales; Veillonellaceae; Selenomonas  
5479 1 Root; Bacteria; Firmicutes; "Clostridia"; Clostridiales  
5510 1 Root; Bacteria; Firmicutes; "Clostridia"; Clostridiales; "Lachnospiraceae"; Oribacterium  
5517 1 Root; Bacteria; Actinobacteria; Actinobacteria  
5518 1 Root; Bacteria; Bacteroidetes; Bacteroidetes; Bacteroidales; Prevotellaceae; Prevotella  
5519 1 Root; Bacteria; Firmicutes; "Clostridia"; Clostridiales; Veillonellaceae; Veillonella  
5526 1 Root; Bacteria; Bacteroidetes; Bacteroidetes; Bacteroidales; Prevotellaceae; Prevotella  
5543 1 Root; Bacteria; Bacteroidetes; Bacteroidetes; Bacteroidales; Prevotellaceae; Prevotella  
5546 1 Root; Bacteria; Firmicutes; "Bacilli"; "Lactobacillales"; Streptococcaceae; Streptococcus  
5559 1 Root; Bacteria; Firmicutes; "Clostridia"; Clostridiales; "Lachnospiraceae"  
5566 1 Root; Bacteria; Firmicutes; "Bacilli"; "Lactobacillales"; Streptococcaceae; Streptococcus  
5567 1 Root; Bacteria; Firmicutes; "Clostridia"; Clostridiales; "Ruminococcaceae"  
5569 1 Root; Bacteria; Firmicutes; "Clostridia"; Clostridiales; Veillonellaceae; Veillonella
