# Supplementary material
Source: PubMed Central journal article supplement (PMC3208663)
Supplement: supp_184_8_957__6.pdf [file supp_184_8_957__6.pdf]

Table E4

| <b>Sample Name</b>         | <b>Sequence Count</b> | <b>Observed Species</b> | <b>Chao1</b>     |
|----------------------------|-----------------------|-------------------------|------------------|
| <b>Extraction Controls</b> |                       |                         |                  |
| h2o1.11.2.223              | 967                   | 77                      | 83               |
| h2o1.11.2.280              | 1219                  | 83                      | 103              |
| h2o1.11.4.222              | 1044                  | 44                      | 51               |
| h2o1.11.5.208              | 456                   | 17                      | 17               |
| h2o1.12.6.281              | 1028                  | 38                      | 44               |
| sal1.11.2.224              | 1499                  | 46                      | 73               |
| sal1.11.4.201              | 525                   | 43                      | 45               |
| sal1.11.5.209              | 804                   | 42                      | 48               |
| ss1.11.2.253               | 1273                  | 82                      | 91               |
| ss1.11.4.272               | 889                   | 57                      | 61               |
| PSBmetal.12.6.286          | 1790                  | 64                      | 73               |
| PSBplastic.12.6.285        | 3717                  | 64                      | 92               |
| <b>Mean (SD)</b>           | <b>1268 (858)</b>     | <b>55 (20)</b>          | <b>65 (25)</b>   |
| <b>Scope #1 Prewash</b>    |                       |                         |                  |
| 3B06.Bronch1.PreWash       | 584                   | 54                      | 66               |
| 3B07.Bronch1.PreWash       | 180                   | 33                      | 38               |
| 3B08.Bronch1.PreWash       | 646                   | 45                      | 46               |
| 3B09.Bronch1.PreWash       | 294                   | 23                      | 33               |
| 3B10.Bronch1.PreWash       | 965                   | 44                      | 65               |
| 3B11.Bronch1.PreWash       | 996                   | 48                      | 51               |
| <b>Mean (SD)</b>           | <b>611 (335)</b>      | <b>41 (11)</b>          | <b>50 (14)</b>   |
| <b>Scope #2 Prewash</b>    |                       |                         |                  |
| 3B06.Bronch2.PreWash       | 2931                  | 103                     | 114              |
| 3B07.Bronch2.PreWash       | 2636                  | 47                      | 58               |
| 3B08.Bronch2.PreWash       | 573                   | 36                      | 36               |
| 3B09.Bronch2.PreWash       | 662                   | 29                      | 32               |
| 3B10.Bronch2.PreWash       | 231                   | 18                      | 18               |
| 3B11.Bronch2.PreWash       | 271                   | 21                      | 22               |
| <b>Mean (SD)</b>           | <b>1217 (1228)</b>    | <b>42 (32)</b>          | <b>47 (36)</b>   |
| <b>Nasopharyngeal Swab</b> |                       |                         |                  |
| 3B06.NP.                   | 561                   | 78                      | 115              |
| 3B07.NP.                   | 871                   | 102                     | 143              |
| 3B08.NP.                   | 5091                  | 93                      | 195              |
| 3B09.NP.                   | 4803                  | 314                     | 563              |
| 3B10.NP.                   | 2117                  | 148                     | 189              |
| 3B11.NP.                   | 65898                 | 523                     | 1030             |
| <b>Mean (SD)</b>           | <b>13224 (23622)</b>  | <b>210 (176)</b>        | <b>373 (361)</b> |
| <b>Oropharygeal Swab</b>   |                       |                         |                  |
| 3B06.OP.                   | 6079                  | 181                     | 426              |
| 3B07.OP.                   | 6322                  | 234                     | 477              |
| 3B08.OP.                   | 8335                  | 253                     | 502              |
| 3B09.OP.                   | 5259                  | 274                     | 512              |

|                  |                    |                 |                 |
|------------------|--------------------|-----------------|-----------------|
| 3B10.OP.         | 7818               | 232             | 507             |
| 3B11.OP.         | 6115               | 218             | 481             |
| <b>Mean (SD)</b> | <b>6655 (1069)</b> | <b>232 (32)</b> | <b>484 (32)</b> |

**Oral Wash**

|                  |                    |                 |                  |
|------------------|--------------------|-----------------|------------------|
| 3B06.OW.         | 5580               | 188             | 351              |
| 3B07.OW.         | 4930               | 174             | 290              |
| 3B08.OW.         | 7967               | 283             | 720              |
| 3B09.OW.         | 6277               | 315             | 756              |
| 3B10.OW.         | 6706               | 250             | 368              |
| 3B11.OW.         | 7523               | 353             | 763              |
| <b>Mean (SD)</b> | <b>6497 (1049)</b> | <b>261 (71)</b> | <b>541 (227)</b> |

**Scope #1 Tip Swab**

|                       |                    |                 |                 |
|-----------------------|--------------------|-----------------|-----------------|
| 3B06.Bronch1.TipSwab. | 6830               | 218             | 381             |
| 3B07.Bronch1.TipSwab. | 4226               | 132             | 175             |
| 3B08.Bronch1.TipSwab. | 3109               | 121             | 162             |
| 3B09.Bronch1.TipSwab. | 4108               | 171             | 301             |
| 3B10.Bronch1.TipSwab. | 3351               | 161             | 227             |
| 3B11.Bronch1.TipSwab. | 3808               | 133             | 228             |
| <b>Mean (SD)</b>      | <b>4239 (1224)</b> | <b>156 (36)</b> | <b>246 (83)</b> |

**Scope #1 PostWash**

|                        |                   |                 |                 |
|------------------------|-------------------|-----------------|-----------------|
| 3B06.Bronch1.PostWash. | 3851              | 140             | 201             |
| 3B07.Bronch1.PostWash. | 3594              | 119             | 145             |
| 3B08.Bronch1.PostWash. | 4909              | 209             | 338             |
| 3B09.Bronch1.PostWash. | 4598              | 195             | 370             |
| 3B10.Bronch1.PostWash. | 5180              | 187             | 315             |
| 3B11.Bronch1.PostWash. | 4913              | 141             | 336             |
| <b>Mean (SD)</b>       | <b>4508 (585)</b> | <b>165 (36)</b> | <b>284 (90)</b> |

**BAL A 1st Return**

|                      |                    |                 |                 |
|----------------------|--------------------|-----------------|-----------------|
| 3B06.BALA.1stReturn. | 246                | 60              | 119             |
| 3B07.BALA.1stReturn. | 4334               | 151             | 222             |
| 3B08.BALA.1stReturn. | 4472               | 168             | 266             |
| 3B09.BALA.1stReturn. | 3149               | 169             | 227             |
| 3B10.BALA.1stReturn. | 4079               | 152             | 253             |
| 3B11.BALA.1stReturn. | 3996               | 166             | 301             |
| <b>Mean (SD)</b>     | <b>3379 (1463)</b> | <b>144 (42)</b> | <b>231 (62)</b> |

**BAL A 2nd Return**

|                      |                    |                 |                 |
|----------------------|--------------------|-----------------|-----------------|
| 3B06.BALA.2ndReturn. | 137                | 43              | 57              |
| 3B07.BALA.2ndReturn. | 5111               | 148             | 298             |
| 3B08.BALA.2ndReturn. | 4359               | 131             | 176             |
| 3B09.BALA.2ndReturn. | 727                | 96              | 125             |
| 3B10.BALA.2ndReturn. | 3545               | 139             | 195             |
| 3B11.BALA.2ndReturn. | 2804               | 134             | 236             |
| <b>Mean (SD)</b>     | <b>2781 (1813)</b> | <b>115 (40)</b> | <b>181 (84)</b> |

**BAL B**

|                  |                    |                |                  |
|------------------|--------------------|----------------|------------------|
| 3B06.BAL.B.      | 610                | 78             | 103              |
| 3B07.BAL.B.      | 750                | 68             | 73               |
| 3B08.BAL.B.      | 1757               | 93             | 103              |
| 3B09.BAL.B.      | 6100               | 243            | 389              |
| 3B10.BAL.B.      | 226                | 50             | 67               |
| 3B11.BAL.B.      | 190                | 41             | 73               |
| <b>Mean (SD)</b> | <b>1606 (2076)</b> | <b>96 (75)</b> | <b>134 (126)</b> |

**PSB**

|                  |                    |                 |                  |
|------------------|--------------------|-----------------|------------------|
| 3B06.PSB.        | 626                | 70              | 76               |
| 3B07.PSB.        | 3601               | 136             | 318              |
| 3B08.PSB.        | 4204               | 128             | 201              |
| 3B09.PSB.        | 4990               | 231             | 357              |
| 3B10.PSB.        | 4282               | 151             | 211              |
| 3B11.PSB.        | 3919               | 160             | 282              |
| <b>Mean (SD)</b> | <b>3604 (1397)</b> | <b>146 (52)</b> | <b>241 (101)</b> |
